# Supplementary material for: Acoustic indices as proxies for bird species richness in an urban green space in Metro Manila
Source: PubMed Central journal article supplement (PMC10381043; doi:10.1371/journal.pone.0289001), 2023-07-28
Supplement: pone.0289001.s001.pdf [file pone.0289001.s001.pdf]

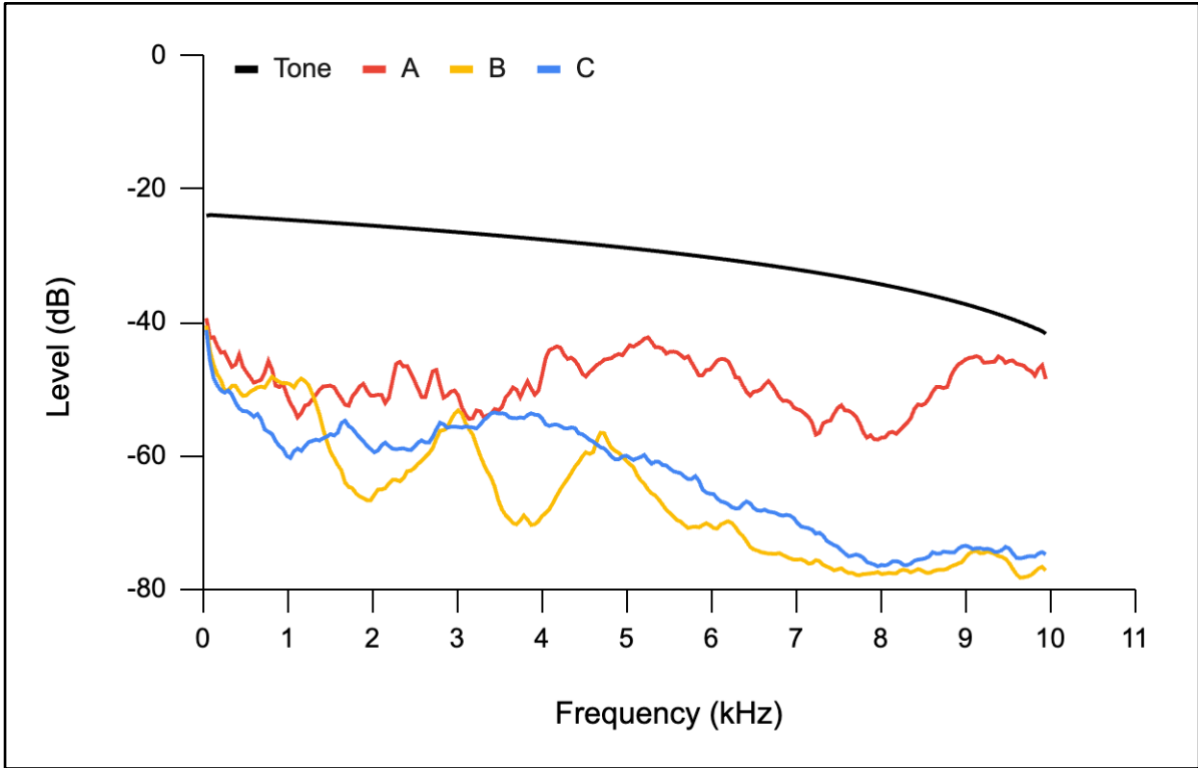

**S1 Fig. The frequency response of recorders A, B, and C with respect to the generated tone (black line) in Audacity® [40]. The spectrum was computed using a default 1024-point FFT analysis. The frequency range is 0-10 kHz.**
