# Supplementary material for: Acoustic indices as proxies for bird species richness in an urban green space in Metro Manila
Source: PubMed Central journal article supplement (PMC10381043; doi:10.1371/journal.pone.0289001), 2023-07-28
Supplement: pone.0289001.s002.pdf [file pone.0289001.s002.pdf]

**S1 Table. Summary of parameters used in the calculation of acoustic indices.**

| Acoustic Index                  | Parameters                                                                | Reference and library <sup>a</sup>         |
|---------------------------------|---------------------------------------------------------------------------|--------------------------------------------|
| Acoustic Complexity Index (ACI) | min_freq = NA, max_freq = NA,<br>j = 5, fft_w = 512                       | Pieretti et al. 2011 <sup>1</sup>          |
| Acoustic Diversity Index (ADI)  | max_freq = 10000, db_threshold = -50,<br>freq_step = 1000, shannon = TRUE | Villanueva-Rivera et al. 2011 <sup>1</sup> |
| Acoustic Evenness Index (AEI)   | max_freq = 10000, db_threshold = -50,<br>freq_step = 1000                 | Villanueva-Rivera et al. 2011 <sup>1</sup> |
| Bioacoustic Index (BI)          | min_freq = 2000, max_freq = 8000,<br>fft_w = 512                          | Boelman et al. 2007 <sup>1</sup>           |
| Acoustic Entropy Index (H)      | f = 44100, wl = 512, envt = "hil"                                         | Sueur et al. 2008 <sup>2</sup>             |
| Acoustic Richness Index (AR)    | envt = "hil"                                                              | Depraetere et al. 2012 <sup>2</sup>        |

<sup>a</sup> R package used for the index calculation: <sup>1</sup> *soundecology* and <sup>2</sup> *seewave*.
