# Supplementary material for: Acoustic indices as proxies for bird species richness in an urban green space in Metro Manila
Source: PubMed Central journal article supplement (PMC10381043; doi:10.1371/journal.pone.0289001), 2023-07-28
Supplement: pone.0289001.s003.pdf [file pone.0289001.s003.pdf]

**S2 Table. The results of GLMM examining how eight acoustic indices reflect bird species richness, season, and time of day, using the dataset of 840 pre-processed 5-min sound samples.**

|                                                                                         | <b>Model</b>                             | <b>k</b> | <b>AIC<sub>c</sub></b> | <b>ΔAIC<sub>c</sub></b> | <b>AIC<sub>cw</sub></b> | <b>log(L)</b> |
|-----------------------------------------------------------------------------------------|------------------------------------------|----------|------------------------|-------------------------|-------------------------|---------------|
| <b>nACI</b>                                                                             |                                          |          |                        |                         |                         |               |
| 1                                                                                       | Richness + Season + Hour + Random effect | 6        | -3688.10               | 14.15                   | 0.00                    | 1850.10       |
| 2                                                                                       | Richness + Season + Random effect        | 5        | -3702.25               | 0.00                    | 0.84                    | 1856.16       |
| 3                                                                                       | Richness + Hour + Random effect          | 5        | -3698.88               | 3.37                    | 0.16                    | 1854.48       |
| <b>ADI</b>                                                                              |                                          |          |                        |                         |                         |               |
| 1                                                                                       | Richness + Season + Hour + Random effect | 6        | 1160.82                | 0.35                    | 0.46                    | -574.36       |
| 2                                                                                       | Richness + Season + Random effect        | 5        | 1160.47                | 0.00                    | 0.54                    | -575.20       |
| 3                                                                                       | Richness + Hour + Random effect          | 5        | 1210.47                | 50.00                   | 0.00                    | -600.20       |
| <i>LRT. 1 vs 2: <math>X^2=10.763</math>, <math>d.f.=1</math>, <math>p=0.0010</math></i> |                                          |          |                        |                         |                         |               |
| <b>1-ΔFI</b>                                                                            |                                          |          |                        |                         |                         |               |
| 1                                                                                       | Richness + Season + Hour + Random effect | 6        | -475.08                | 0.00                    | 0.87                    | 243.59        |
| 2                                                                                       | Richness + Season + Random effect        | 5        | -471.27                | 3.81                    | 0.13                    | 240.67        |
| 3                                                                                       | Richness + Hour + Random effect          | 5        | -446.98                | 28.10                   | 0.00                    | 228.53        |
| <i>LRT. 1 vs 2: <math>X^2=5.843</math>, <math>d.f.=1</math>, <math>p=0.0156</math></i>  |                                          |          |                        |                         |                         |               |
| <b>BI</b>                                                                               |                                          |          |                        |                         |                         |               |
| 1                                                                                       | Richness + Season + Hour + Random effect | 6        | 4287.74                | 0.00                    | 0.57                    | -2137.82      |
| 2                                                                                       | Richness + Season + Random effect        | 5        | 4288.33                | 0.59                    | 0.43                    | -2139.13      |
| 3                                                                                       | Richness + Hour + Random effect          | 5        | 4308.80                | 21.06                   | 0.00                    | -2149.37      |
| <i>LRT. 1 vs 2: <math>X^2=7.951</math>, <math>d.f.=1</math>, <math>p=0.0048</math></i>  |                                          |          |                        |                         |                         |               |
| <b>H</b>                                                                                |                                          |          |                        |                         |                         |               |
| 1                                                                                       | Richness + Season + Hour + Random effect | 6        | -2542.09               | 0.00                    | 0.77                    | 1277.09       |
| 2                                                                                       | Richness + Season + Random effect        | 5        | -2539.14               | 2.95                    | 0.18                    | 1274.60       |
| 3                                                                                       | Richness + Hour + Random effect          | 5        | -2536.88               | 5.21                    | 0.06                    | 1273.47       |
| <i>LRT. 1 vs 2: <math>X^2=4.979</math>, <math>d.f.=1</math>, <math>p=0.0257</math></i>  |                                          |          |                        |                         |                         |               |
| <b>Ht</b>                                                                               |                                          |          |                        |                         |                         |               |
| 1                                                                                       | Richness + Season + Hour + Random effect | 6        | -5292.30               | 0.00                    | 0.77                    | 2652.20       |
| 2                                                                                       | Richness + Season + Random effect        | 5        | -5289.89               | 2.41                    | 0.23                    | 2649.98       |
| 3                                                                                       | Richness + Hour + Random effect          | 5        | -5280.91               | 11.39                   | 0.00                    | 2645.49       |
| <i>LRT. 1 vs 2: <math>X^2=4.436</math>, <math>d.f.=1</math>, <math>p=0.0352</math></i>  |                                          |          |                        |                         |                         |               |
| <b>Hf</b>                                                                               |                                          |          |                        |                         |                         |               |
| 1                                                                                       | Richness + Season + Hour + Random effect | 6        | -2632.26               | 0.00                    | 0.65                    | 1322.18       |

|   |                                   |   |          |      |      |         |
|---|-----------------------------------|---|----------|------|------|---------|
| 2 | Richness + Season + Random effect | 5 | -2629.71 | 2.54 | 0.18 | 1319.89 |
| 3 | Richness + Hour + Random effect   | 5 | -2629.46 | 2.79 | 0.16 | 1319.77 |

*LRT. 1 vs 2:  $X^2=4.574$ ,  $d.f.=1$ ,  $p=0.0325$*

*LRT. 1 vs 3:  $X^2=4.824$ ,  $d.f.=1$ ,  $p=0.0281$*

---

|           |                                          |   |        |       |      |       |
|-----------|------------------------------------------|---|--------|-------|------|-------|
| <b>AR</b> |                                          |   |        |       |      |       |
| 1         | Richness + Season + Hour + Random effect | 6 | -59.78 | 0.00  | 1.00 | 35.94 |
| 2         | Richness + Season + Random effect        | 5 | -37.18 | 22.60 | 0.00 | 23.63 |
| 3         | Richness + Hour + Random effect          | 5 | 21.35  | 81.13 | 0.00 | -5.64 |

---

We specified the acoustic index as the dependent variable, bird species richness, season, and time of day as fixed effects, and the recording point as the random effect. A common set of three models were fitted: full model (Richness + Season + Hour + Random effect), and fixed effects models (Richness + Season + Random effect; Richness + Hour + Random effect). Normalized Acoustic Complexity index (nACI), Acoustic Diversity index (ADI), Inverse Acoustic Evenness index (1-AEI), Bioacoustic index (BI), Acoustic Entropy index (H), Temporal Entropy Index (Ht), Spectral Entropy Index (Hf), and Acoustic Richness Index (AR). For each model is indicated: k, the number of parameters;  $AIC_c$ , corrected Akaike Information Criterion;  $\Delta AIC_c$ , difference in  $AIC_c$  values between each model with the lowest  $AIC_c$  model;  $AIC_{c,w}$ ,  $AIC_c$  weight; and  $\log(L)$ , the log-likelihood. Random effect: (1|Site). LRT, Likelihood-ratio test.
