# Supplementary material for: Acoustic indices as proxies for bird species richness in an urban green space in Metro Manila
Source: PubMed Central journal article supplement (PMC10381043; doi:10.1371/journal.pone.0289001), 2023-07-28
Supplement: pone.0289001.s004.pdf [file pone.0289001.s004.pdf]

**S3 Table. The results of the acoustic index analysis for 840 raw 5-min sound samples.**

| WAV                    | Site | Season | Hour | nACI       | ADI      | 1-AEI    | BI         | H          | Ht         | Hf         | AR         | SH |
|------------------------|------|--------|------|------------|----------|----------|------------|------------|------------|------------|------------|----|
| 2021-07-28-12-36-IB100 | A    | Wet    | 12   | 1.07559083 | 0.38814  | 0.143843 | 3.29263888 | 0.66716821 | 0.97889301 | 0.68155376 | 0.25       | 1  |
| 2021-08-08-14-30-IB100 | A    | Wet    | 14   | 1.04062759 | 0.047968 | 0.101831 | 1.90157493 | 0.502519   | 0.94868075 | 0.52970296 | 0.109375   | 1  |
| 2021-08-19-18-00-IB100 | A    | Wet    | 18   | 1.006191   | 2.083415 | 0.634492 | 3.30991612 | 0.74159129 | 0.99170868 | 0.74779147 | 0.30078125 | 1  |
| 2020-09-11-09-54-IB100 | A    | Wet    | 09   | 1.01168017 | 2.300942 | 0.967357 | 4.74863244 | 0.87663996 | 0.99134425 | 0.88429419 | 0.00286858 | 0  |
| 2020-10-02-10-18-IB100 | A    | Wet    | 10   | 1.0125641  | 2.29343  | 0.923184 | 4.48608279 | 0.83952714 | 0.99350019 | 0.84501961 | 0.00699292 | 0  |
| 2020-10-04-11-06-IB100 | A    | Wet    | 11   | 1.07001307 | 1.37266  | 0.327065 | 8.68033847 | 0.5534336  | 0.99608745 | 0.55560744 | 0.89122807 | 5  |
| 2020-10-08-18-00-IB100 | A    | Wet    | 18   | 1.05268483 | 0.884476 | 0.198603 | 4.2779863  | 0.65760581 | 0.98644542 | 0.66664186 | 0.03567867 | 0  |
| 2020-10-25-06-06-IB100 | A    | Wet    | 06   | 1.20218092 | 2.289806 | 0.919309 | 1.09408915 | 0.81044176 | 0.99096941 | 0.81782723 | 0.20683287 | 3  |
| 2020-11-01-05-24-IB100 | A    | Dry    | 05   | 1.01564286 | 0.7046   | 0.163377 | 3.98673636 | 0.69791554 | 0.98888935 | 0.70575696 | 0.00853186 | 0  |
| 2020-11-01-12-12-IB100 | A    | Dry    | 12   | 1.13983514 | 0.936291 | 0.271896 | 1.95848357 | 0.81064697 | 0.97216306 | 0.83385905 | 0.02880886 | 2  |
| 2020-11-01-16-42-IB100 | A    | Dry    | 16   | 1.07433983 | 1.054209 | 0.303133 | 2.64485279 | 0.708349   | 0.96620224 | 0.73312706 | 0.03053247 | 0  |
| 2020-11-02-10-18-IB100 | A    | Dry    | 10   | 1.0264045  | 1.809784 | 0.466213 | 1.97701495 | 0.66704378 | 0.99129685 | 0.67290013 | 0.07074177 | 5  |
| 2020-11-02-11-12-IB100 | A    | Dry    | 11   | 1.02268101 | 1.914546 | 0.524646 | 2.6913031  | 0.68683036 | 0.99134418 | 0.69282735 | 0.05141274 | 3  |
| 2020-11-05-09-06-IB100 | A    | Dry    | 09   | 1.02220358 | 1.624741 | 0.419258 | 3.72368346 | 0.63999482 | 0.99075716 | 0.64596537 | 0.49133887 | 2  |
| 2020-11-06-10-48-IB100 | A    | Dry    | 10   | 1.09587544 | 1.618837 | 0.412345 | 1.69220615 | 0.63032895 | 0.9911922  | 0.6359301  | 0.57772853 | 1  |
| 2020-11-06-12-12-IB100 | A    | Dry    | 12   | 1.02121795 | 1.447581 | 0.325586 | 2.24928898 | 0.66997364 | 0.99071401 | 0.67625332 | 0.22759003 | 2  |
| 2020-11-06-17-00-IB100 | A    | Dry    | 17   | 1.01603423 | 0.776582 | 0.193645 | 3.88594303 | 0.6964621  | 0.9905514  | 0.70310546 | 0.24975069 | 1  |
| 2020-11-07-09-30-IB100 | A    | Dry    | 09   | 1.01869872 | 2.235528 | 0.801481 | 2.77324446 | 0.67470374 | 0.99160472 | 0.68041602 | 0.65152355 | 1  |
| 2020-11-10-12-18-IB100 | A    | Dry    | 12   | 1.01676868 | 1.207393 | 0.25836  | 2.28431105 | 0.64477042 | 0.99111991 | 0.65054734 | 0.11867036 | 2  |
| 2020-11-14-08-00-IB100 | A    | Dry    | 08   | 1.03353765 | 1.878224 | 0.571993 | 3.86619177 | 0.65430887 | 0.9912666  | 0.66007355 | 0.51417667 | 5  |
| 2020-11-14-10-00-IB100 | A    | Dry    | 10   | 1.03163498 | 2.013063 | 0.61974  | 1.69908852 | 0.64743953 | 0.99129453 | 0.65312529 | 0.51732841 | 3  |
| 2020-11-16-08-00-IB100 | A    | Dry    | 08   | 1.02130392 | 1.855453 | 0.495067 | 3.55178114 | 0.70810006 | 0.9895839  | 0.71555333 | 0.15298246 | 3  |
| 2020-11-16-10-00-IB100 | A    | Dry    | 10   | 1.02328638 | 1.699674 | 0.414344 | 2.82068372 | 0.66502787 | 0.99132099 | 0.67085019 | 0.17327178 | 3  |
| 2020-11-19-07-00-IB100 | A    | Dry    | 07   | 1.03859458 | 0.838775 | 0.193615 | 4.17245192 | 0.6760237  | 0.98499823 | 0.68631972 | 0.0128655  | 4  |
| 2020-11-21-11-42-IB100 | A    | Dry    | 11   | 1.01580503 | 1.317564 | 0.288618 | 1.53319561 | 0.65233074 | 0.99093327 | 0.65829937 | 0.21811019 | 1  |

|                        |   |     |    |            |          |          |            |            |            |            |            |   |
|------------------------|---|-----|----|------------|----------|----------|------------|------------|------------|------------|------------|---|
| 2020-11-21-13-12-IB100 | A | Dry | 13 | 1.02212315 | 0.525025 | 0.139768 | 1.88168239 | 0.60259867 | 0.9869958  | 0.61053823 | 0.14589104 | 1 |
| 2020-11-21-18-36-IB100 | A | Dry | 18 | 1.1031774  | 1.960281 | 0.564788 | 9.40587656 | 0.74889097 | 0.99066683 | 0.75594634 | 0.04678363 | 0 |
| 2020-11-25-15-12-IB100 | A | Dry | 15 | 1.02453909 | 1.609397 | 0.376946 | 3.33837437 | 0.60760292 | 0.99155802 | 0.61277596 | 0.71449677 | 0 |
| 2020-11-25-17-30-IB100 | A | Dry | 17 | 1.01700189 | 2.272408 | 0.863886 | 5.27399766 | 0.75478863 | 0.99152559 | 0.76123969 | 0.2255217  | 1 |
| 2020-11-26-10-48-IB100 | A | Dry | 10 | 1.02320399 | 0.250194 | 0.117427 | 2.53700338 | 0.61820574 | 0.98758064 | 0.62598001 | 0.21540166 | 2 |
| 2020-11-26-16-24-IB100 | A | Dry | 16 | 1.01791703 | 0.324129 | 0.12215  | 2.69701847 | 0.60756733 | 0.9881116  | 0.61487723 | 0.24099723 | 1 |
| 2020-11-27-05-06-IB100 | A | Dry | 05 | 1.07671683 | 2.106503 | 0.660439 | 6.4212675  | 0.74743487 | 0.98951202 | 0.75535704 | 0.03791936 | 0 |
| 2020-11-30-15-24-IB100 | A | Dry | 15 | 1.00786862 | 0.583432 | 0.167588 | 1.35402989 | 0.65340888 | 0.98874122 | 0.66084924 | 0.2128655  | 1 |
| 2020-12-01-08-00-IB100 | A | Dry | 08 | 1.02712914 | 0.861309 | 0.217618 | 2.20000533 | 0.63800902 | 0.99029993 | 0.64425836 | 0.41052632 | 3 |
| 2020-12-02-11-00-IB100 | A | Dry | 11 | 1.02610158 | 1.338249 | 0.295629 | 2.29292521 | 0.60107584 | 0.99132166 | 0.60633785 | 0.5445614  | 1 |
| 2020-12-04-07-48-IB100 | A | Dry | 07 | 1.01942588 | 1.180812 | 0.256544 | 4.30690284 | 0.6260187  | 0.99144878 | 0.6314181  | 0.4806402  | 5 |
| 2020-12-04-13-42-IB100 | A | Dry | 13 | 1.00351497 | 0.195732 | 0.109959 | 1.9649742  | 0.58474003 | 0.99130553 | 0.58986862 | 0.64792859 | 1 |
| 2020-12-07-10-30-IB100 | A | Dry | 10 | 1.12155013 | 1.845539 | 0.495903 | 1.86651135 | 0.684051   | 0.99123643 | 0.69009873 | 0.57982148 | 0 |
| 2020-12-07-12-42-IB100 | A | Dry | 12 | 1.04335906 | 1.811476 | 0.476324 | 1.0411925  | 0.68067274 | 0.99095076 | 0.68688856 | 0.06640813 | 1 |
| 2020-12-09-15-06-IB100 | A | Dry | 15 | 1.11717739 | 1.713782 | 0.51181  | 2.46149442 | 0.79296329 | 0.98818974 | 0.80244032 | 0.25893506 | 0 |
| 2020-12-10-05-42-IB100 | A | Dry | 05 | 1.12758207 | 1.423466 | 0.335922 | 2.0146756  | 0.81961941 | 0.97941453 | 0.83684628 | 0.03854725 | 2 |
| 2020-12-11-08-30-IB100 | A | Dry | 08 | 1.00195475 | 1.413527 | 0.315676 | 2.26407102 | 0.61243378 | 0.99161773 | 0.61761075 | 0.83718067 | 7 |
| 2020-12-18-15-24-IB100 | A | Dry | 15 | 1.0191421  | 0.410118 | 0.129304 | 2.4422638  | 0.65509436 | 0.9854649  | 0.66475667 | 0.06352724 | 2 |
| 2020-12-18-16-54-IB100 | A | Dry | 16 | 1.03668912 | 2.28411  | 0.901035 | 2.07947099 | 0.8193924  | 0.99094181 | 0.82688246 | 0.10649431 | 1 |
| 2020-12-22-07-30-IB100 | A | Dry | 07 | 1.04369145 | 1.63482  | 0.41505  | 3.84660107 | 0.73868507 | 0.98463874 | 0.75020923 | 0.0851462  | 5 |
| 2020-12-25-12-48-IB100 | A | Dry | 12 | 1.01879197 | 0.969009 | 0.21155  | 2.21121099 | 0.71976927 | 0.98961947 | 0.72731923 | 0.04530625 | 2 |
| 2020-12-26-09-42-IB100 | A | Dry | 09 | 1.03410712 | 2.20321  | 0.756436 | 2.07207066 | 0.75503611 | 0.99121998 | 0.76172407 | 0.02708526 | 3 |
| 2020-12-26-18-06-IB100 | A | Dry | 18 | 1.05818459 | 2.272203 | 0.861449 | 2.58161689 | 0.78757524 | 0.99100672 | 0.7947224  | 0.02880886 | 0 |
| 2020-12-28-05-54-IB100 | A | Dry | 05 | 1.04305121 | 1.13549  | 0.262913 | 3.84402158 | 0.72546445 | 0.98933653 | 0.7332838  | 0.04520776 | 2 |
| 2020-12-29-12-00-IB100 | A | Dry | 12 | 1.01484392 | 1.792844 | 0.458413 | 2.14901846 | 0.64691997 | 0.99127904 | 0.65261137 | 0.19769775 | 2 |
| 2020-12-31-16-12-IB100 | A | Dry | 16 | 1.023044   | 0.743241 | 0.233553 | 1.23528497 | 0.70092451 | 0.96839027 | 0.72380375 | 0.01895968 | 2 |
| 2021-01-01-05-12-IB100 | A | Dry | 05 | 1.01750972 | 1.949783 | 0.564438 | 6.10695132 | 0.72876206 | 0.99133894 | 0.73512905 | 0.0141582  | 1 |
| 2021-01-01-08-12-IB100 | A | Dry | 08 | 1.01162964 | 1.161781 | 0.251224 | 2.91260408 | 0.74452947 | 0.99070971 | 0.75151123 | 0.01739612 | 5 |

|                        |   |     |    |            |          |          |            |            |            |            |            |   |
|------------------------|---|-----|----|------------|----------|----------|------------|------------|------------|------------|------------|---|
| 2021-01-05-11-00-IB100 | A | Dry | 11 | 1.01555277 | 1.237772 | 0.262587 | 2.11867441 | 0.64419394 | 0.99060723 | 0.65030207 | 0.12657433 | 2 |
| 2021-01-12-09-12-IB100 | A | Dry | 09 | 1.01029981 | 1.528825 | 0.429201 | 4.45448644 | 0.71668102 | 0.97379527 | 0.73596682 | 0.0102924  | 4 |
| 2021-01-12-17-30-IB100 | A | Dry | 17 | 1.01012212 | 1.963161 | 0.548855 | 2.63685182 | 0.69390271 | 0.99156916 | 0.69980264 | 0.66729455 | 2 |
| 2021-01-14-08-36-IB100 | A | Dry | 08 | 1.05464258 | 1.516084 | 0.346943 | 2.94324679 | 0.71865694 | 0.98769334 | 0.72761141 | 0.23118498 | 4 |
| 2021-01-16-07-54-IB100 | A | Dry | 07 | 1.03031348 | 1.66033  | 0.407335 | 2.9562917  | 0.64027251 | 0.99145684 | 0.64578959 | 0.55953216 | 4 |
| 2021-01-18-14-42-IB100 | A | Dry | 14 | 1.02034547 | 1.212815 | 0.290399 | 2.620895   | 0.67332388 | 0.98920118 | 0.68067436 | 0.28051708 | 1 |
| 2021-01-19-05-42-IB100 | A | Dry | 05 | 1.0301437  | 1.879021 | 0.535165 | 7.32865754 | 0.7485221  | 0.99117233 | 0.75518865 | 0.048261   | 0 |
| 2021-01-27-07-18-IB100 | A | Dry | 07 | 1.02286466 | 1.932141 | 0.532674 | 2.55100195 | 0.78336115 | 0.99049629 | 0.79087742 | 0.11619575 | 4 |
| 2021-01-27-14-54-IB100 | A | Dry | 14 | 1.01305722 | 0.612884 | 0.168168 | 1.99240947 | 0.70153624 | 0.98865729 | 0.70958485 | 0.23955679 | 1 |
| 2021-01-28-06-30-IB100 | A | Dry | 06 | 1.01900041 | 1.739308 | 0.45152  | 3.52284083 | 0.73836882 | 0.99125097 | 0.74488585 | 0.10297322 | 2 |
| 2021-02-04-06-06-IB100 | A | Dry | 06 | 1.02086853 | 1.588741 | 0.381286 | 5.68003324 | 0.70091945 | 0.98795367 | 0.70946591 | 0.04904894 | 3 |
| 2021-02-05-07-00-IB100 | A | Dry | 07 | 1.02933336 | 2.146445 | 0.691827 | 3.85076526 | 0.74475414 | 0.99114084 | 0.75141101 | 0.03564174 | 6 |
| 2021-02-05-08-30-IB100 | A | Dry | 08 | 1.11854713 | 1.112408 | 0.292743 | 4.43511117 | 0.72472156 | 0.98953713 | 0.7323844  | 0.2426839  | 3 |
| 2021-02-05-11-00-IB100 | A | Dry | 11 | 1.03567268 | 0.30273  | 0.134432 | 1.76030617 | 0.59492669 | 0.98746851 | 0.60247662 | 0.24524469 | 3 |
| 2021-02-07-14-00-IB100 | A | Dry | 14 | 1.01637179 | 1.61608  | 0.40317  | 1.90763763 | 0.66186275 | 0.99133035 | 0.66765106 | 0.40316405 | 2 |
| 2021-02-11-08-00-IB100 | A | Dry | 08 | 1.07184589 | 1.966635 | 0.554759 | 4.09873597 | 0.68651399 | 0.99117759 | 0.69262461 | 0.47294552 | 3 |
| 2021-02-12-09-18-IB100 | A | Dry | 09 | 1.0213876  | 0.849863 | 0.203418 | 1.95284283 | 0.61305447 | 0.9910638  | 0.61858224 | 0.08930748 | 3 |
| 2021-02-12-12-30-IB100 | A | Dry | 12 | 1.02075506 | 0.232118 | 0.119081 | 2.68803897 | 0.59000719 | 0.98640858 | 0.59813672 | 0.02427824 | 7 |
| 2021-02-13-09-54-IB100 | A | Dry | 09 | 1.13905949 | 1.973118 | 0.625019 | 2.28590103 | 0.88644269 | 0.98024792 | 0.90430458 | 0.03235457 | 2 |
| 2021-02-15-08-54-IB100 | A | Dry | 08 | 1.01589485 | 1.939952 | 0.53822  | 2.10750581 | 0.63897019 | 0.99150026 | 0.64444783 | 0.45835642 | 4 |
| 2021-02-15-09-00-IB100 | A | Dry | 09 | 1.0171767  | 2.092779 | 0.645507 | 2.77759944 | 0.65041257 | 0.99150081 | 0.65598794 | 0.46330563 | 4 |
| 2021-02-15-14-36-IB100 | A | Dry | 14 | 1.00287225 | 2.300844 | 0.972693 | 5.26835463 | 0.89572837 | 0.98595112 | 0.90849166 | 0.13728532 | 0 |
| 2021-02-16-09-18-IB100 | A | Dry | 09 | 1.02097916 | 0.681339 | 0.167441 | 2.38680729 | 0.70699366 | 0.98887208 | 0.71494956 | 0.06448754 | 7 |
| 2021-02-16-13-24-IB100 | A | Dry | 13 | 1.02985305 | 0.666129 | 0.170956 | 5.00897304 | 0.6898742  | 0.97743868 | 0.70579793 | 0.02677747 | 3 |
| 2021-02-19-12-00-IB100 | A | Dry | 12 | 1.0626074  | 1.204231 | 0.335139 | 1.10054383 | 0.7706842  | 0.98046653 | 0.78603825 | 0.07470606 | 3 |
| 2021-02-20-15-54-IB100 | A | Dry | 15 | 1.04624911 | 0.805092 | 0.19101  | 3.65008379 | 0.72455291 | 0.98928263 | 0.73240234 | 0.0613358  | 3 |
| 2021-02-22-17-12-IB100 | A | Dry | 17 | 1.0489714  | 1.429152 | 0.325196 | 2.04024648 | 0.68294447 | 0.99042103 | 0.68954965 | 0.38675285 | 2 |
| 2021-02-23-10-06-IB100 | A | Dry | 10 | 1.0365748  | 1.7881   | 0.511463 | 2.02857553 | 0.65209694 | 0.99129057 | 0.65782623 | 0.46914127 | 3 |

|                        |   |     |    |            |          |          |            |            |            |            |            |   |
|------------------------|---|-----|----|------------|----------|----------|------------|------------|------------|------------|------------|---|
| 2021-02-26-18-36-IB100 | A | Dry | 18 | 1.02634327 | 0.934611 | 0.198032 | 6.87435589 | 0.74501683 | 0.98017762 | 0.7600835  | 0.02804555 | 0 |
| 2021-03-02-07-54-IB100 | A | Dry | 07 | 1.00532015 | 1.935381 | 0.534893 | 1.841231   | 0.74811522 | 0.99101754 | 0.75489605 | 0.04983687 | 6 |
| 2021-03-03-09-24-IB100 | A | Dry | 09 | 1.0297546  | 2.272362 | 0.861507 | 4.12267679 | 0.76644458 | 0.99154443 | 0.77298058 | 0.67800554 | 2 |
| 2021-03-04-12-00-IB100 | A | Dry | 12 | 1.02569801 | 0.994428 | 0.222024 | 2.52240376 | 0.62378921 | 0.99116302 | 0.62935077 | 0.40603263 | 3 |
| 2021-03-05-18-12-IB100 | A | Dry | 18 | 1.02249606 | 1.123081 | 0.242494 | 5.60553833 | 0.74657474 | 0.98731826 | 0.75616422 | 0.15756233 | 1 |
| 2021-03-06-11-30-IB100 | A | Dry | 11 | 1.02493067 | 1.57307  | 0.376017 | 1.71943144 | 0.63294281 | 0.99134455 | 0.63846904 | 0.44941828 | 5 |
| 2021-03-09-11-06-IB100 | A | Dry | 11 | 1.01736768 | 1.987223 | 0.559858 | 2.68802871 | 0.69647483 | 0.99143628 | 0.70249076 | 0.51245306 | 2 |
| 2021-03-10-06-42-IB100 | A | Dry | 06 | 1.01597839 | 1.911216 | 0.534492 | 3.12488044 | 0.73948955 | 0.99113467 | 0.74610401 | 0.08509695 | 6 |
| 2021-03-10-08-24-IB100 | A | Dry | 08 | 1.02611919 | 2.248944 | 0.824063 | 4.98318629 | 0.75884193 | 0.99154532 | 0.7653124  | 0.5322253  | 3 |
| 2021-03-10-12-30-IB100 | A | Dry | 12 | 1.04295344 | 1.048572 | 0.242568 | 4.56496192 | 0.75723125 | 0.98532498 | 0.76850913 | 0.1235334  | 0 |
| 2021-03-11-14-00-IB100 | A | Dry | 14 | 1.03436723 | 1.775915 | 0.466651 | 2.57261875 | 0.73326157 | 0.99098301 | 0.73993355 | 0.50403201 | 2 |
| 2021-03-12-14-36-IB100 | A | Dry | 14 | 1.02519431 | 0.450122 | 0.137646 | 2.61503587 | 0.70257438 | 0.98731446 | 0.71160143 | 0.19782087 | 1 |
| 2021-03-15-07-24-IB100 | A | Dry | 07 | 1.02233953 | 2.033277 | 0.59481  | 6.72150206 | 0.77650845 | 0.98861819 | 0.78544827 | 0.05489689 | 4 |
| 2021-03-16-15-06-IB100 | A | Dry | 15 | 1.04863135 | 1.316548 | 0.294218 | 2.36528304 | 0.74274091 | 0.99028631 | 0.75002643 | 0.19321637 | 1 |
| 2021-03-16-18-30-IB100 | A | Dry | 18 | 1.02220737 | 0.315024 | 0.122082 | 3.94279351 | 0.67529551 | 0.98484142 | 0.68568959 | 0.04188366 | 0 |
| 2021-03-17-07-54-IB100 | A | Dry | 07 | 1.03467657 | 1.690663 | 0.431074 | 2.27725147 | 0.76653985 | 0.98886015 | 0.77517518 | 0.21392428 | 4 |
| 2021-03-17-16-12-IB100 | A | Dry | 16 | 1.0108613  | 0.017544 | 0.100572 | 2.71420704 | 0.6445243  | 0.97383646 | 0.66184039 | 0.01452755 | 4 |
| 2021-03-17-18-00-IB100 | A | Dry | 18 | 1.02983468 | 1.033002 | 0.220928 | 7.55937946 | 0.73573543 | 0.9725723  | 0.75648405 | 0.02137273 | 2 |
| 2021-03-19-11-24-IB100 | A | Dry | 11 | 1.02671695 | 2.194466 | 0.742458 | 3.21683518 | 0.72070157 | 0.99156232 | 0.72683437 | 0.72701754 | 4 |
| 2021-03-20-16-18-IB100 | A | Dry | 16 | 1.02563997 | 0.676591 | 0.158598 | 4.30124048 | 0.7269101  | 0.97869378 | 0.74273498 | 0.0282056  | 2 |
| 2021-03-21-09-00-IB100 | A | Dry | 09 | 1.02568692 | 1.036471 | 0.226818 | 2.82208445 | 0.69273919 | 0.98247662 | 0.70509484 | 0.00554017 | 6 |
| 2021-03-25-08-06-IB100 | A | Dry | 08 | 1.03306794 | 2.164339 | 0.713714 | 2.2883916  | 0.79912546 | 0.99078812 | 0.80655535 | 0.22001847 | 5 |
| 2021-03-26-05-00-IB100 | A | Dry | 05 | 1.0383474  | 1.959227 | 0.570717 | 8.21277701 | 0.73662669 | 0.99139438 | 0.74302084 | 0.20008618 | 2 |
| 2021-03-27-05-48-IB100 | A | Dry | 05 | 1.07277386 | 2.196623 | 0.748862 | 7.06125589 | 0.76601675 | 0.99132029 | 0.77272377 | 0.12799015 | 3 |
| 2021-03-29-17-36-IB100 | A | Dry | 17 | 1.16794667 | 1.918364 | 0.543435 | 2.31637744 | 0.83660663 | 0.98152378 | 0.85235492 | 0.00837181 | 2 |
| 2021-03-30-05-48-IB100 | A | Dry | 05 | 1.06681807 | 1.771156 | 0.445473 | 5.86108674 | 0.72812709 | 0.98512501 | 0.73912151 | 0.05653432 | 4 |
| 2021-03-30-08-36-IB100 | A | Dry | 08 | 1.02254045 | 2.227886 | 0.782728 | 2.734195   | 0.83486391 | 0.99099113 | 0.84245346 | 0.03526008 | 3 |
| 2021-03-30-12-24-IB100 | A | Dry | 12 | 1.03013731 | 0.303783 | 0.125139 | 2.88884991 | 0.76121913 | 0.98324573 | 0.77419012 | 0.01909511 | 3 |

|                        |   |     |    |            |          |          |            |            |            |            |            |   |
|------------------------|---|-----|----|------------|----------|----------|------------|------------|------------|------------|------------|---|
| 2021-04-01-14-42-IB100 | A | Dry | 14 | 1.03322915 | 0.337686 | 0.122679 | 2.37536261 | 0.74486724 | 0.9764757  | 0.76281186 | 0.00113266 | 4 |
| 2021-04-03-12-42-IB100 | A | Dry | 12 | 1.02695817 | 0.724257 | 0.17579  | 3.14218173 | 0.70044474 | 0.98562575 | 0.71065994 | 0.006008   | 4 |
| 2021-04-03-16-06-IB100 | A | Dry | 16 | 1.02646466 | 0.572631 | 0.177053 | 3.26472034 | 0.76283626 | 0.98187603 | 0.77691709 | 0.00302862 | 3 |
| 2021-04-04-16-00-IB100 | A | Dry | 16 | 1.03575412 | 2.298717 | 0.95001  | 2.42869554 | 0.9157072  | 0.98919395 | 0.92571047 | 0.03072946 | 2 |
| 2021-04-04-18-54-IB100 | A | Dry | 18 | 1.0345185  | 1.223883 | 0.263364 | 10.6615446 | 0.76671586 | 0.96297755 | 0.79619287 | 0.00103416 | 0 |
| 2021-04-07-09-24-IB100 | A | Dry | 09 | 1.01465363 | 1.186542 | 0.279377 | 2.10138778 | 0.6738027  | 0.99014208 | 0.68051113 | 0.20487535 | 5 |
| 2021-04-07-13-18-IB100 | A | Dry | 13 | 1.02738369 | 0.526125 | 0.140516 | 2.83839735 | 0.66365822 | 0.97702973 | 0.67926103 | 0.04520776 | 4 |
| 2021-04-10-10-42-IB100 | A | Dry | 10 | 1.01781777 | 2.202825 | 0.757218 | 2.01345894 | 0.7587605  | 0.99070482 | 0.76587948 | 0.20991074 | 2 |
| 2021-04-11-16-00-IB100 | A | Dry | 16 | 1.03288706 | 0.345093 | 0.143722 | 0.92812882 | 0.69751608 | 0.95343756 | 0.73158024 | 0.00025854 | 2 |
| 2021-04-14-16-48-IB100 | A | Dry | 16 | 1.01099743 | 1.9238   | 0.531434 | 2.29737559 | 0.72716503 | 0.9912999  | 0.73354696 | 0.03826408 | 3 |
| 2021-04-16-05-30-IB100 | A | Dry | 05 | 1.0549079  | 2.093523 | 0.659214 | 7.66050638 | 0.80849858 | 0.98977684 | 0.81684936 | 0.04469067 | 6 |
| 2021-04-16-06-54-IB100 | A | Dry | 06 | 1.01951059 | 1.641761 | 0.392363 | 6.92135923 | 0.790509   | 0.97328375 | 0.81220816 | 0.00819945 | 4 |
| 2021-04-17-07-12-IB100 | A | Dry | 07 | 1.0053711  | 2.057476 | 0.656237 | 7.20872971 | 0.77521646 | 0.99157415 | 0.78180382 | 0.37284087 | 6 |
| 2021-04-18-05-12-IB100 | A | Dry | 05 | 1.01568604 | 2.073659 | 0.636175 | 6.72255731 | 0.79886282 | 0.99116787 | 0.80598135 | 0.00720222 | 2 |
| 2021-04-19-15-48-IB100 | A | Dry | 15 | 1.03198568 | 0.031201 | 0.1012   | 1.60067118 | 0.52771938 | 0.96413547 | 0.54734983 | 0.01891043 | 2 |
| 2021-04-22-10-06-IB100 | A | Dry | 10 | 1.01235473 | 0.992926 | 0.220573 | 3.0546848  | 0.71315186 | 0.98955063 | 0.72068254 | 0.11546938 | 4 |
| 2021-04-22-15-42-IB100 | A | Dry | 15 | 1.0207818  | 0.373028 | 0.130054 | 3.24942015 | 0.58614005 | 0.97427512 | 0.60161656 | 0.06256694 | 4 |
| 2021-04-27-13-48-IB100 | A | Dry | 13 | 1.11292826 | 1.927495 | 0.5644   | 2.5079278  | 0.70759843 | 0.99120358 | 0.713878   | 0.4140474  | 2 |
| 2021-04-29-15-00-IB100 | A | Dry | 15 | 1.05662821 | 1.768568 | 0.453703 | 2.16899829 | 0.7508066  | 0.97290748 | 0.77171428 | 0.04609418 | 4 |
| 2021-05-02-06-06-IB100 | A | Wet | 06 | 1.01635927 | 2.023205 | 0.589269 | 2.91185948 | 0.73768916 | 0.9921615  | 0.74351722 | 0.13146199 | 5 |
| 2021-05-02-08-18-IB100 | A | Wet | 08 | 1.02227898 | 2.016878 | 0.607878 | 3.47418879 | 0.81614565 | 0.98195211 | 0.83114609 | 0.09462604 | 3 |
| 2021-05-04-07-36-IB100 | A | Wet | 07 | 1.00729164 | 1.946254 | 0.572452 | 8.80992142 | 0.80875796 | 0.99057847 | 0.81645017 | 0.47374577 | 3 |
| 2021-05-07-06-12-IB100 | A | Wet | 06 | 1.0057909  | 2.016396 | 0.626719 | 8.67671664 | 0.81433162 | 0.98113184 | 0.82999204 | 0.10179132 | 5 |
| 2021-05-09-13-00-IB100 | A | Wet | 13 | 1.01426377 | 2.119187 | 0.665401 | 3.71313478 | 0.73675304 | 0.9912697  | 0.74324176 | 0.10489381 | 2 |
| 2021-05-13-11-30-IB100 | A | Wet | 11 | 1.01923386 | 1.618304 | 0.45074  | 7.27587412 | 0.78128082 | 0.97830572 | 0.79860601 | 0.06282549 | 2 |
| 2021-05-13-13-36-IB100 | A | Wet | 13 | 1.0089031  | 1.415562 | 0.33024  | 5.52469735 | 0.75479673 | 0.98457579 | 0.76662126 | 0.10485688 | 4 |
| 2021-05-13-15-06-IB100 | A | Wet | 15 | 1.01555533 | 1.835211 | 0.523228 | 7.67196083 | 0.7990416  | 0.97617485 | 0.81854352 | 0.06040012 | 2 |
| 2021-05-15-12-18-IB100 | A | Wet | 12 | 1.00098873 | 2.103049 | 0.654317 | 4.62812783 | 0.76291515 | 0.99142404 | 0.76951447 | 0.3309326  | 3 |

|                        |   |     |    |            |          |          |            |            |            |            |            |   |
|------------------------|---|-----|----|------------|----------|----------|------------|------------|------------|------------|------------|---|
| 2021-05-16-11-54-IB100 | A | Wet | 11 | 1.01243368 | 1.772058 | 0.497688 | 7.18245535 | 0.81865962 | 0.9801965  | 0.83519949 | 0.08574946 | 0 |
| 2021-05-17-13-00-IB100 | A | Wet | 13 | 1.01477954 | 1.616666 | 0.443607 | 5.90333579 | 0.79548784 | 0.98299684 | 0.80924761 | 0.07871961 | 0 |
| 2021-05-18-07-54-IB100 | A | Wet | 07 | 1.02957192 | 2.29821  | 0.949475 | 6.08181342 | 0.83690929 | 0.98716097 | 0.84779414 | 0.25263158 | 0 |
| 2021-05-18-08-00-IB100 | A | Wet | 08 | 1.01177519 | 2.228458 | 0.795783 | 8.66373709 | 0.79601724 | 0.98101067 | 0.81142567 | 0.12304094 | 0 |
| 2021-05-18-14-36-IB100 | A | Wet | 14 | 1.00277081 | 2.161596 | 0.716939 | 7.34513046 | 0.80614372 | 0.97827632 | 0.82404501 | 0.0646599  | 4 |
| 2021-05-21-07-54-IB100 | A | Wet | 07 | 1.01718517 | 2.070271 | 0.6414   | 8.13103262 | 0.81308374 | 0.99015954 | 0.82116438 | 0.44674669 | 0 |
| 2021-05-21-17-30-IB100 | A | Wet | 17 | 1.01468579 | 0.049302 | 0.10313  | 4.02156343 | 0.60507354 | 0.96019621 | 0.63015615 | 0.00669745 | 3 |
| 2021-05-23-15-48-IB100 | A | Wet | 15 | 1.0267512  | 2.134847 | 0.70136  | 5.16669577 | 0.77493501 | 0.99150024 | 0.78157824 | 0.37838104 | 2 |
| 2021-05-23-18-30-IB100 | A | Wet | 18 | 1.02412017 | 1.011211 | 0.221759 | 4.15580406 | 0.71876051 | 0.98575943 | 0.72914393 | 0.06106494 | 2 |
| 2021-05-25-18-54-IB100 | A | Wet | 18 | 1.06376653 | 2.23278  | 0.795194 | 6.60530297 | 0.73004485 | 0.99167353 | 0.73617459 | 0.32840874 | 0 |
| 2021-05-27-06-42-IB100 | A | Wet | 06 | 1.01428147 | 2.219648 | 0.827416 | 14.971085  | 0.78337144 | 0.99138665 | 0.79017752 | 0.82043706 | 1 |
| 2021-05-27-16-12-IB100 | A | Wet | 16 | 1.02580755 | 1.412524 | 0.323246 | 4.77595438 | 0.6609256  | 0.98964185 | 0.66784322 | 0.30419206 | 3 |
| 2021-05-28-10-54-IB100 | A | Wet | 10 | 1.00686038 | 2.116599 | 0.678376 | 6.55327725 | 0.77211172 | 0.99082823 | 0.7792589  | 0.48659895 | 4 |
| 2021-05-30-14-00-IB100 | A | Wet | 14 | 1.00763349 | 1.633871 | 0.444038 | 7.63222053 | 0.80002902 | 0.98002448 | 0.81633574 | 0.10522622 | 2 |
| 2021-06-01-10-24-IB100 | A | Wet | 10 | 1.01476858 | 1.901448 | 0.513657 | 3.98677161 | 0.81100708 | 0.97195169 | 0.8344109  | 0.0344229  | 2 |
| 2021-06-03-10-54-IB100 | A | Wet | 10 | 1.01418842 | 1.776133 | 0.50955  | 9.27730348 | 0.80657151 | 0.98801148 | 0.81635844 | 0.28336103 | 2 |
| 2021-06-06-06-48-IB100 | A | Wet | 06 | 1.01355171 | 2.236816 | 0.842049 | 14.5777638 | 0.7935109  | 0.99127903 | 0.80049197 | 0.74725762 | 2 |
| 2021-06-08-07-24-IB100 | A | Wet | 07 | 1.02516422 | 2.296795 | 0.946142 | 6.66539756 | 0.84433114 | 0.99015169 | 0.85272908 | 0.4449369  | 1 |
| 2021-06-08-14-18-IB100 | A | Wet | 14 | 1.03805219 | 2.302261 | 0.985537 | 1.67595512 | 0.92351884 | 0.99008499 | 0.93276723 | 0.4443952  | 0 |
| 2021-06-09-14-42-IB100 | A | Wet | 14 | 1.00519701 | 1.44254  | 0.354122 | 2.2699469  | 0.68804225 | 0.98980982 | 0.69512571 | 0.32743613 | 2 |
| 2021-06-09-17-18-IB100 | A | Wet | 17 | 1.01733237 | 2.253345 | 0.826599 | 2.11917271 | 0.69488993 | 0.99160964 | 0.70076964 | 0.47377039 | 3 |
| 2021-06-11-14-36-IB100 | A | Wet | 14 | 0.99556224 | 0.630891 | 0.161027 | 3.39293779 | 0.61981012 | 0.99086877 | 0.6255219  | 0.49048938 | 4 |
| 2021-06-11-16-54-IB100 | A | Wet | 16 | 1.12114945 | 2.2971   | 0.945644 | 1.86901211 | 0.82502575 | 0.99135626 | 0.83221923 | 0.22372422 | 3 |
| 2021-06-12-09-12-IB100 | A | Wet | 09 | 1.01003409 | 2.012435 | 0.623769 | 8.3648717  | 0.82807742 | 0.99069671 | 0.83585361 | 0.35075408 | 4 |
| 2021-06-13-06-42-IB100 | A | Wet | 06 | 1.00765564 | 2.226555 | 0.819078 | 12.5976618 | 0.80609322 | 0.99127169 | 0.813191   | 0.6955494  | 4 |
| 2021-06-15-16-18-IB100 | A | Wet | 16 | 1.01781282 | 1.332077 | 0.290442 | 4.90822587 | 0.73127999 | 0.98452109 | 0.74277738 | 0.0947984  | 2 |
| 2021-06-17-17-18-IB100 | A | Wet | 17 | 1.02492824 | 0.64429  | 0.188851 | 3.23401539 | 0.72614592 | 0.98531046 | 0.73697169 | 0.09894737 | 3 |
| 2021-06-18-14-48-IB100 | A | Wet | 14 | 1.003008   | 1.70561  | 0.443088 | 7.26321478 | 0.81393164 | 0.98335648 | 0.82770761 | 0.1417667  | 5 |

|                        |   |     |    |            |          |          |            |            |            |            |            |   |
|------------------------|---|-----|----|------------|----------|----------|------------|------------|------------|------------|------------|---|
| 2021-06-19-16-42-IB100 | A | Wet | 16 | 1.00869175 | 0.118205 | 0.108376 | 3.33647215 | 0.67869258 | 0.98230184 | 0.69092061 | 0.08017236 | 2 |
| 2021-06-20-05-30-IB100 | A | Wet | 05 | 1.01207052 | 2.236747 | 0.830047 | 13.6704078 | 0.78900926 | 0.98986646 | 0.79708657 | 0.41524161 | 3 |
| 2021-06-20-10-24-IB100 | A | Wet | 10 | 1.0048853  | 1.939494 | 0.571679 | 7.01624042 | 0.81465541 | 0.99061881 | 0.82237023 | 0.25300092 | 4 |
| 2021-06-22-08-54-IB100 | A | Wet | 08 | 1.00264226 | 2.164151 | 0.708955 | 5.25307341 | 0.82220067 | 0.99097239 | 0.82969079 | 0.169012   | 4 |
| 2021-06-22-15-48-IB100 | A | Wet | 15 | 0.99718115 | 0.761343 | 0.179364 | 4.52833328 | 0.71525332 | 0.97313262 | 0.73500087 | 0.04269621 | 4 |
| 2021-06-22-16-54-IB100 | A | Wet | 16 | 1.00889753 | 1.682845 | 0.448887 | 2.76211377 | 0.72316815 | 0.99106771 | 0.72968592 | 0.30389658 | 5 |
| 2021-06-23-07-00-IB100 | A | Wet | 07 | 1.01709499 | 2.228366 | 0.825152 | 13.319106  | 0.79300073 | 0.99123286 | 0.80001457 | 0.68390274 | 4 |
| 2021-06-25-09-00-IB100 | A | Wet | 09 | 1.01226921 | 2.055309 | 0.645515 | 12.1082329 | 0.79975393 | 0.98985612 | 0.80794967 | 0.41037858 | 4 |
| 2021-06-26-07-42-IB100 | A | Wet | 07 | 1.01529023 | 2.300074 | 0.961322 | 7.60805965 | 0.82693144 | 0.99030839 | 0.83502417 | 0.45710065 | 2 |
| 2021-06-28-06-18-IB100 | A | Wet | 06 | 1.00993027 | 2.268776 | 0.864768 | 7.38388768 | 0.81078667 | 0.98933467 | 0.8195272  | 0.11065559 | 4 |
| 2021-06-29-11-42-IB100 | A | Wet | 11 | 0.99722641 | 0.401239 | 0.129215 | 2.21902308 | 0.55110772 | 0.98952076 | 0.55694407 | 0.35804248 | 3 |
| 2021-07-03-14-24-IB100 | A | Wet | 14 | 1.17615182 | 2.302432 | 0.990259 | 2.29005706 | 0.86971005 | 0.99041513 | 0.87812678 | 0.3567867  | 0 |
| 2021-07-04-16-48-IB100 | A | Wet | 16 | 1.01660613 | 0.378479 | 0.144401 | 1.83660917 | 0.72298641 | 0.98195687 | 0.73627104 | 0.02276393 | 0 |
| 2021-07-08-09-00-IB100 | A | Wet | 09 | 1.00390969 | 2.143457 | 0.709312 | 5.45118576 | 0.82858157 | 0.99100933 | 0.83609866 | 0.59720529 | 1 |
| 2021-07-08-15-36-IB100 | A | Wet | 15 | 1.02510017 | 1.701687 | 0.438186 | 2.91475153 | 0.72576643 | 0.99091464 | 0.73242074 | 0.27578947 | 1 |
| 2021-07-10-06-18-IB100 | A | Wet | 06 | 1.00266892 | 1.736748 | 0.492122 | 8.70569072 | 0.79395248 | 0.98852005 | 0.80317286 | 0.18736842 | 4 |
| 2021-07-13-06-06-IB100 | A | Wet | 06 | 0.99617322 | 1.767209 | 0.462235 | 5.86365363 | 0.73149667 | 0.98725114 | 0.74094285 | 0.1365097  | 4 |
| 2021-07-13-13-54-IB100 | A | Wet | 13 | 1.07821207 | 1.701453 | 0.426523 | 3.2484182  | 0.68510748 | 0.98995181 | 0.69206144 | 0.37850416 | 4 |
| 2021-07-13-17-00-IB100 | A | Wet | 17 | 1.01550119 | 2.280522 | 0.892307 | 14.0526471 | 0.83404651 | 0.97864393 | 0.85224716 | 0.08480148 | 5 |
| 2021-07-15-17-18-IB100 | A | Wet | 17 | 1.01270398 | 2.116989 | 0.703784 | 12.1216719 | 0.82929647 | 0.98684261 | 0.84035332 | 0.17108033 | 2 |
| 2021-07-15-18-54-IB100 | A | Wet | 18 | 1.01738337 | 1.596297 | 0.375677 | 6.7331006  | 0.75309928 | 0.99097616 | 0.759957   | 0.05012004 | 0 |
| 2021-07-16-15-30-IB100 | A | Wet | 15 | 1.0261898  | 2.032823 | 0.667741 | 14.6603056 | 0.82988989 | 0.98685    | 0.84094836 | 0.24176054 | 1 |
| 2021-07-17-06-48-IB100 | A | Wet | 06 | 1.01303762 | 2.244831 | 0.820531 | 7.28237056 | 0.80962038 | 0.98992133 | 0.81786336 | 0.19698369 | 3 |
| 2021-07-18-13-06-IB100 | A | Wet | 13 | 1.02088097 | 1.759558 | 0.449818 | 7.50083807 | 0.78597392 | 0.98810514 | 0.79543552 | 0.18313327 | 6 |
| 2021-07-19-06-00-IB100 | A | Wet | 06 | 1.12201724 | 2.280965 | 0.892307 | 2.14168669 | 0.79311984 | 0.99128507 | 0.80009259 | 0.44552786 | 3 |
| 2021-07-19-16-18-IB100 | A | Wet | 16 | 1.00819697 | 1.735597 | 0.434204 | 3.57634653 | 0.69733884 | 0.9913103  | 0.70345163 | 0.51523546 | 5 |
| 2021-07-21-12-12-IB100 | A | Wet | 12 | 1.1021577  | 2.302309 | 0.987492 | 2.28183611 | 0.86487311 | 0.99113281 | 0.87261071 | 0.57141274 | 1 |
| 2021-07-23-18-12-IB100 | A | Wet | 18 | 1.0598406  | 2.293179 | 0.92405  | 4.07651969 | 0.88504233 | 0.99051613 | 0.89351632 | 0.48930748 | 0 |

|                        |   |     |    |            |          |          |            |            |            |            |            |   |
|------------------------|---|-----|----|------------|----------|----------|------------|------------|------------|------------|------------|---|
| 2021-07-24-05-00-IB100 | A | Wet | 05 | 1.11327545 | 2.302488 | 0.992281 | 2.25801238 | 0.88303989 | 0.99081247 | 0.89122808 | 0.45553709 | 0 |
| 2021-07-25-06-48-IB100 | A | Wet | 06 | 1.11382187 | 1.875598 | 0.563325 | 1.297954   | 0.8283127  | 0.96067853 | 0.86221631 | 0.01569714 | 1 |
| 2021-07-25-08-12-IB100 | A | Wet | 08 | 1.10237297 | 2.302572 | 0.997265 | 1.73618972 | 0.89695853 | 0.99049606 | 0.90556496 | 0.36363189 | 2 |
| 2021-07-25-09-00-IB100 | A | Wet | 09 | 1.12853845 | 2.302482 | 0.992454 | 1.87512637 | 0.87532754 | 0.99066699 | 0.88357394 | 0.43512465 | 1 |
| 2021-07-25-17-06-IB100 | A | Wet | 17 | 1.01763992 | 2.281489 | 0.917295 | 12.256407  | 0.84413408 | 0.99108137 | 0.85173035 | 0.61335796 | 1 |
| 2021-07-27-10-30-IB100 | A | Wet | 10 | 1.07856242 | 1.16611  | 0.278344 | 2.4013194  | 0.77771952 | 0.97953395 | 0.79396893 | 0.09967375 | 2 |
| 2021-07-27-11-36-IB100 | A | Wet | 11 | 1.05858949 | 0.866023 | 0.198661 | 2.96040447 | 0.66732165 | 0.97272113 | 0.68603593 | 0.04819945 | 2 |
| 2021-08-01-09-30-IB100 | A | Wet | 09 | 1.02372618 | 0.124389 | 0.113458 | 2.17199952 | 0.58742138 | 0.96429777 | 0.60917012 | 0.02437673 | 5 |
| 2021-08-01-16-48-IB100 | A | Wet | 16 | 1.02334008 | 0.031721 | 0.101134 | 2.10097487 | 0.5991959  | 0.95563814 | 0.62701129 | 0.00526931 | 2 |
| 2021-08-01-17-54-IB100 | A | Wet | 17 | 1.00905135 | 0.09242  | 0.104481 | 2.52081412 | 0.64420972 | 0.9854159  | 0.65374399 | 0.16270853 | 0 |
| 2021-08-02-11-18-IB100 | A | Wet | 11 | 1.06077977 | 0.187335 | 0.110406 | 2.1830513  | 0.54740606 | 0.96192254 | 0.56907499 | 0.01964912 | 2 |
| 2021-08-03-05-00-IB100 | A | Wet | 05 | 1.1758303  | 2.300736 | 0.966312 | 1.7377823  | 0.83887284 | 0.99101335 | 0.84647986 | 0.44609418 | 0 |
| 2021-08-04-07-12-IB100 | A | Wet | 07 | 1.01632018 | 1.802045 | 0.496943 | 3.71893651 | 0.79368374 | 0.97915308 | 0.81058188 | 0.09492151 | 2 |
| 2021-08-05-05-00-IB100 | A | Wet | 05 | 1.00907102 | 1.818211 | 0.47308  | 5.57121312 | 0.67513167 | 0.99149281 | 0.68092442 | 0.49950139 | 2 |
| 2021-08-05-13-48-IB100 | A | Wet | 13 | 1.02033196 | 1.714484 | 0.456568 | 4.95638867 | 0.86834255 | 0.9833367  | 0.8830572  | 0.15778393 | 0 |
| 2021-08-06-05-00-IB100 | A | Wet | 05 | 1.06165156 | 2.086367 | 0.645495 | 7.77658767 | 0.73074448 | 0.99137473 | 0.73710219 | 0.43475531 | 0 |
| 2021-08-12-08-18-IB100 | A | Wet | 08 | 1.01147355 | 2.200952 | 0.757853 | 4.98061614 | 0.80084866 | 0.99053472 | 0.80850135 | 0.40982456 | 4 |
| 2021-08-13-07-06-IB100 | A | Wet | 07 | 0.99505357 | 2.134194 | 0.679259 | 3.96951673 | 0.75177537 | 0.9915501  | 0.75818193 | 0.1845614  | 5 |
| 2021-08-13-12-06-IB100 | A | Wet | 12 | 1.02657549 | 1.727048 | 0.431276 | 2.85338033 | 0.66810681 | 0.99148374 | 0.67384546 | 0.27502616 | 3 |
| 2021-08-16-11-54-IB100 | A | Wet | 11 | 1.03479867 | 0.618296 | 0.183168 | 4.75905447 | 0.68749582 | 0.98478365 | 0.69811864 | 0.09461373 | 6 |
| 2021-08-18-06-48-IB100 | A | Wet | 06 | 0.99815753 | 2.08636  | 0.639306 | 3.98504397 | 0.75909471 | 0.99168153 | 0.76546219 | 0.19028624 | 7 |
| 2021-08-21-17-06-IB100 | A | Wet | 17 | 1.06067138 | 2.282648 | 0.890962 | 2.25485761 | 0.87506891 | 0.98639204 | 0.88714109 | 0.21281625 | 0 |
| 2021-08-24-16-12-IB100 | A | Wet | 16 | 1.053285   | 2.302508 | 0.993067 | 2.31737393 | 0.88170574 | 0.99126002 | 0.88947977 | 0.40784241 | 1 |
| 2021-08-24-18-42-IB100 | A | Wet | 18 | 1.05223561 | 2.052564 | 0.623121 | 2.83491021 | 0.76733698 | 0.99130632 | 0.77406647 | 0.2426839  | 0 |
| 2021-08-25-16-12-IB100 | A | Wet | 16 | 1.08903159 | 2.174409 | 0.730456 | 2.31377333 | 0.73015897 | 0.99143088 | 0.73646987 | 0.48363189 | 2 |
| 2021-08-27-12-18-IB100 | A | Wet | 12 | 1.01115352 | 0.573381 | 0.15432  | 3.1157641  | 0.63604029 | 0.98672916 | 0.6445946  | 0.09440443 | 3 |
| 2021-08-28-05-24-IB100 | A | Wet | 05 | 1.00472359 | 2.103824 | 0.666474 | 8.04021056 | 0.7654811  | 0.99147786 | 0.77206071 | 0.36934441 | 1 |
| 2021-08-28-07-18-IB100 | A | Wet | 07 | 1.02047724 | 2.046476 | 0.607462 | 7.41667682 | 0.70860199 | 0.99112525 | 0.71494696 | 0.47017544 | 4 |



|                        |   |     |    |            |          |          |            |            |            |            |            |   |
|------------------------|---|-----|----|------------|----------|----------|------------|------------|------------|------------|------------|---|
| 2021-08-28-11-30-IB100 | A | Wet | 11 | 1.0195365  | 2.054996 | 0.631179 | 8.23346369 | 0.81333049 | 0.98907267 | 0.82231621 | 0.22352724 | 1 |
| 2021-08-28-12-30-IB100 | A | Wet | 12 | 1.03080974 | 2.294258 | 0.928641 | 2.2951354  | 0.88062145 | 0.98896426 | 0.8904482  | 0.3133518  | 1 |
| 2021-08-29-18-30-IB100 | A | Wet | 18 | 1.02409119 | 2.15296  | 0.72578  | 4.82372239 | 0.75424081 | 0.99175027 | 0.76051485 | 0.20802709 | 1 |
| 2021-09-03-13-30-IB100 | A | Wet | 13 | 1.03806618 | 2.078516 | 0.65533  | 2.03776065 | 0.76383451 | 0.99052657 | 0.77113985 | 0.20529394 | 0 |
| 2021-09-06-14-42-IB100 | A | Wet | 14 | 1.07091766 | 2.268453 | 0.856774 | 2.26142395 | 0.7462553  | 0.99147305 | 0.7526733  | 0.39852262 | 3 |
| 2021-09-08-17-42-IB100 | A | Wet | 17 | 1.04026796 | 2.244717 | 0.816793 | 2.66046772 | 0.76305398 | 0.991555   | 0.76955285 | 0.38677747 | 1 |
| 2021-09-13-05-30-IB100 | A | Wet | 05 | 1.01513385 | 2.178608 | 0.74326  | 7.69999833 | 0.76945646 | 0.99152675 | 0.77603198 | 0.33799938 | 4 |
| 2021-09-13-06-54-IB100 | A | Wet | 06 | 1.00156186 | 1.77996  | 0.461838 | 3.96188081 | 0.71086394 | 0.99127472 | 0.71712102 | 0.35469375 | 5 |
| 2021-09-13-13-18-IB100 | A | Wet | 13 | 1.01858487 | 1.216612 | 0.285668 | 4.53439159 | 0.71136159 | 0.98893492 | 0.71932093 | 0.14035088 | 3 |
| 2021-09-16-07-48-IB100 | A | Wet | 07 | 1.00146859 | 0.994727 | 0.219563 | 2.22902974 | 0.71728223 | 0.98697255 | 0.72674992 | 0.09292705 | 4 |
| 2021-09-19-10-42-IB100 | A | Wet | 10 | 1.01079799 | 0.433838 | 0.142937 | 2.99274501 | 0.76267297 | 0.99075832 | 0.7697871  | 0.11819021 | 4 |
| 2021-09-23-13-06-IB100 | A | Wet | 13 | 1.02783794 | 2.292368 | 0.938567 | 2.02918208 | 0.83343951 | 0.99027456 | 0.84162468 | 0.39815328 | 1 |
| 2021-09-25-08-06-IB100 | A | Wet | 08 | 0.99845197 | 2.026577 | 0.601438 | 5.71949536 | 0.77454565 | 0.99046411 | 0.78200274 | 0.13961219 | 5 |
| 2021-09-25-15-24-IB100 | A | Wet | 15 | 1.01116121 | 1.026182 | 0.220172 | 3.28398329 | 0.53607956 | 0.99259352 | 0.54007965 | 0.97207756 | 0 |
| 2021-09-26-13-42-IB100 | A | Wet | 13 | 1.01157618 | 2.249388 | 0.82458  | 2.53233856 | 0.75721765 | 0.99134574 | 0.76382802 | 0.20252385 | 2 |
| 2021-09-27-08-42-IB100 | A | Wet | 08 | 1.06889246 | 1.72783  | 0.5007   | 1.97851307 | 0.80422204 | 0.98653318 | 0.8152002  | 0.12927055 | 5 |
| 2021-09-27-14-12-IB100 | A | Wet | 14 | 0.99956476 | 1.727525 | 0.441415 | 3.276997   | 0.72002287 | 0.99079076 | 0.72671537 | 0.2433241  | 5 |
| 2021-09-27-17-12-IB100 | A | Wet | 17 | 0.99956313 | 1.390571 | 0.338586 | 3.38888198 | 0.76413639 | 0.9908489  | 0.77119366 | 0.27423823 | 2 |
| 2021-09-30-05-18-IB100 | A | Wet | 05 | 1.0549834  | 2.302387 | 0.988983 | 2.38635914 | 0.88049797 | 0.99087956 | 0.88860242 | 0.31231764 | 0 |
| 2021-10-01-13-06-IB100 | A | Wet | 13 | 1.01392675 | 0.675838 | 0.184298 | 4.25230221 | 0.70160531 | 0.9886251  | 0.70967783 | 0.20274546 | 0 |
| 2021-10-01-17-00-IB100 | A | Wet | 17 | 1.01747548 | 2.041219 | 0.648813 | 12.2653785 | 0.82675201 | 0.98810951 | 0.83670079 | 0.27104955 | 1 |
| 2021-10-05-09-54-IB100 | A | Wet | 09 | 1.05518585 | 2.272818 | 0.869159 | 2.52461029 | 0.87518135 | 0.98887473 | 0.88502752 | 0.22682672 | 0 |
| 2021-10-05-10-48-IB100 | A | Wet | 10 | 1.06436197 | 2.231693 | 0.790912 | 2.94822595 | 0.81208449 | 0.99122516 | 0.81927348 | 0.38356417 | 3 |
| 2021-10-12-15-06-IB100 | A | Wet | 15 | 1.07448868 | 0.340834 | 0.135395 | 1.48545518 | 0.71099854 | 0.98911445 | 0.71882333 | 0.28024623 | 4 |
| 2021-10-15-12-00-IB100 | A | Wet | 12 | 1.01555072 | 1.194602 | 0.253322 | 2.48842971 | 0.57964455 | 0.99145449 | 0.58464061 | 0.56405048 | 2 |
| 2021-10-15-18-12-IB100 | A | Wet | 18 | 1.09707046 | 2.230607 | 0.797012 | 6.38568848 | 0.78411142 | 0.99154139 | 0.79080049 | 0.53776547 | 0 |
| 2021-10-18-12-48-IB100 | A | Wet | 12 | 1.01610228 | 0.407204 | 0.132271 | 3.78548062 | 0.61524621 | 0.98631927 | 0.62377998 | 0.16982456 | 1 |
| 2021-10-18-14-06-IB100 | A | Wet | 14 | 1.01665249 | 1.00827  | 0.21106  | 3.21168565 | 0.62697601 | 0.99133973 | 0.63245322 | 0.61144968 | 2 |

|                        |   |     |    |            |          |          |            |            |            |            |            |   |
|------------------------|---|-----|----|------------|----------|----------|------------|------------|------------|------------|------------|---|
| 2021-10-19-18-06-IB100 | A | Wet | 18 | 1.0140523  | 0.914698 | 0.197346 | 6.99272066 | 0.68102249 | 0.99048388 | 0.68756544 | 0.32982456 | 1 |
| 2021-10-22-06-54-IB100 | A | Wet | 06 | 1.01593228 | 1.488616 | 0.343275 | 3.28990629 | 0.69841689 | 0.99225266 | 0.70387001 | 0.43397969 | 3 |
| 2021-10-24-17-42-IB100 | A | Wet | 17 | 1.01506343 | 2.204916 | 0.759105 | 7.34738072 | 0.74906789 | 0.99176769 | 0.75528563 | 0.43124654 | 1 |
| 2021-10-25-10-48-IB100 | A | Wet | 10 | 1.03437069 | 1.577993 | 0.368594 | 2.3328021  | 0.6777673  | 0.99164835 | 0.68347545 | 0.67220683 | 3 |
| 2021-10-29-13-18-IB100 | A | Wet | 13 | 1.0194639  | 1.84838  | 0.489771 | 3.18091477 | 0.63179366 | 0.99149968 | 0.63721015 | 0.74132348 | 0 |
| 2021-10-30-15-48-IB100 | A | Wet | 15 | 1.01920999 | 1.564293 | 0.371094 | 3.91618018 | 0.68764543 | 0.99063084 | 0.69414902 | 0.14128655 | 1 |
| 2021-11-01-14-30-IB100 | A | Dry | 14 | 1.02225709 | 0.970779 | 0.20574  | 2.71003949 | 0.71133974 | 0.9885355  | 0.71958947 | 0.06426593 | 0 |
| 2021-11-03-15-54-IB100 | A | Dry | 15 | 1.01049599 | 0.491852 | 0.135958 | 3.22823637 | 0.68316236 | 0.99070546 | 0.68957161 | 0.39372115 | 0 |
| 2021-11-08-17-48-IB100 | A | Dry | 17 | 1.03622448 | 1.176101 | 0.2492   | 3.86904685 | 0.72370574 | 0.98976367 | 0.73119044 | 0.2245614  | 0 |
| 2021-12-26-10-18-IB100 | A | Dry | 10 | 1.01810615 | 1.87909  | 0.498895 | 3.87174765 | 0.69012126 | 0.99206953 | 0.695638   | 0.09307479 | 4 |
| 2022-01-01-05-24-IB100 | A | Dry | 05 | 1.01044089 | 1.521769 | 0.355707 | 6.02649337 | 0.69754129 | 0.98605148 | 0.70740859 | 0.06697445 | 0 |
| 2022-01-02-17-54-IB100 | A | Dry | 17 | 1.00228895 | 2.138873 | 0.685289 | 7.26896538 | 0.78228475 | 0.99165917 | 0.78886454 | 0.21589412 | 1 |
| 2022-01-04-14-30-IB100 | A | Dry | 14 | 1.03409555 | 1.034775 | 0.23895  | 2.27774152 | 0.75579065 | 0.99087516 | 0.76275062 | 0.21999384 | 3 |
| 2022-01-04-15-00-IB100 | A | Dry | 15 | 1.02160461 | 2.069111 | 0.640634 | 2.22429983 | 0.72150036 | 0.99147179 | 0.7277064  | 0.29921822 | 1 |
| 2022-01-05-18-54-IB100 | A | Dry | 18 | 1.03165541 | 1.947202 | 0.57284  | 9.30642754 | 0.78228161 | 0.99151109 | 0.78897918 | 0.23730379 | 0 |
| 2022-01-06-13-06-IB100 | A | Dry | 13 | 1.01407999 | 0.993605 | 0.212343 | 3.44080436 | 0.63190205 | 0.99106302 | 0.63760028 | 0.11843644 | 3 |
| 2022-01-08-11-18-IB100 | A | Dry | 11 | 1.01762502 | 0.712295 | 0.172084 | 4.38320361 | 0.64029092 | 0.9897369  | 0.64693043 | 0.05127732 | 7 |
| 2022-01-09-17-54-IB100 | A | Dry | 17 | 1.05247355 | 2.284752 | 0.896704 | 10.1679709 | 0.83593709 | 0.99088502 | 0.84362674 | 0.13604186 | 0 |
| 2022-01-10-11-06-IB100 | A | Dry | 11 | 1.02014153 | 0.565052 | 0.149568 | 2.99178396 | 0.61368585 | 0.98949469 | 0.62020126 | 0.13956294 | 4 |
| 2022-01-11-18-30-IB100 | A | Dry | 18 | 1.03535816 | 1.881183 | 0.518843 | 4.63242976 | 0.73029814 | 0.9910099  | 0.73692315 | 0.22182826 | 0 |
| 2022-01-15-08-18-IB100 | A | Dry | 08 | 1.03072504 | 1.567501 | 0.394903 | 3.17529662 | 0.78039598 | 0.98616301 | 0.79134583 | 0.09843029 | 3 |
| 2022-01-15-11-54-IB100 | A | Dry | 11 | 1.01327609 | 1.55389  | 0.35929  | 3.03860458 | 0.64182    | 0.99159028 | 0.6472633  | 0.34773777 | 3 |
| 2022-01-15-18-24-IB100 | A | Dry | 18 | 1.04495882 | 1.806169 | 0.47889  | 5.61268676 | 0.73661724 | 0.98968318 | 0.74429601 | 0.18449985 | 0 |
| 2022-01-16-06-42-IB100 | A | Dry | 06 | 1.00584582 | 2.019171 | 0.590767 | 4.91517026 | 0.69570181 | 0.99182032 | 0.70143936 | 0.39844875 | 3 |
| 2022-01-17-13-24-IB100 | A | Dry | 13 | 1.02819751 | 0.551068 | 0.150671 | 1.87346071 | 0.67392375 | 0.98863539 | 0.68167068 | 0.18204986 | 4 |
| 2022-01-24-10-00-IB100 | A | Dry | 10 | 1.00345335 | 2.082524 | 0.636497 | 2.78519833 | 0.71193073 | 0.99145557 | 0.7180662  | 0.21806094 | 4 |
| 2022-01-24-15-42-IB100 | A | Dry | 15 | 1.01442637 | 1.412638 | 0.314804 | 2.6667254  | 0.67373132 | 0.99144748 | 0.67954312 | 0.16454294 | 5 |
| 2022-01-29-09-12-IB100 | A | Dry | 09 | 1.0082733  | 1.545    | 0.355174 | 3.35611134 | 0.72481612 | 0.99088205 | 0.73148576 | 0.11027393 | 4 |

|                        |   |     |    |            |          |          |            |            |            |            |            |   |
|------------------------|---|-----|----|------------|----------|----------|------------|------------|------------|------------|------------|---|
| 2022-01-29-13-54-IB100 | A | Dry | 13 | 1.02027118 | 1.14629  | 0.248593 | 3.09497624 | 0.66417195 | 0.99040646 | 0.67060544 | 0.07590028 | 5 |
| 2022-01-30-09-48-IB100 | A | Dry | 09 | 1.01704217 | 0.259264 | 0.123391 | 4.10540102 | 0.60482286 | 0.95599432 | 0.63266365 | 0.00369344 | 5 |
| 2022-01-31-11-00-IB100 | A | Dry | 11 | 1.01563934 | 1.763089 | 0.451149 | 2.22858086 | 0.66271405 | 0.9912512  | 0.66856317 | 0.23630348 | 6 |
| 2020-07-17-08-36-ADMIN | B | Wet | 08 | 1.01718564 | 1.218374 | 0.2654   | 4.79352504 | 0.70753163 | 0.97523941 | 0.72549532 | 0.0349646  | 6 |
| 2020-07-19-07-42-ADMIN | B | Wet | 07 | 1.06376967 | 1.961051 | 0.567961 | 5.12449213 | 0.75732245 | 0.98737426 | 0.76700647 | 0.39022469 | 5 |
| 2020-08-16-09-42-ADMIN | B | Wet | 09 | 1.02758446 | 0.763497 | 0.178345 | 2.27522571 | 0.72575137 | 0.98920561 | 0.7336709  | 0.14164358 | 4 |
| 2020-08-25-09-12-ADMIN | B | Wet | 09 | 1.03981403 | 0.683992 | 0.171666 | 3.75435517 | 0.64679043 | 0.98665684 | 0.65553737 | 0.29577101 | 1 |
| 2020-08-27-17-30-ADMIN | B | Wet | 17 | 1.02800629 | 0.616088 | 0.156114 | 2.66069751 | 0.6982281  | 0.98758845 | 0.7070031  | 0.22714681 | 0 |
| 2020-08-30-14-12-ADMIN | B | Wet | 14 | 1.02579704 | 0.633108 | 0.16006  | 2.74696612 | 0.69022581 | 0.98619851 | 0.69988527 | 0.15546938 | 3 |
| 2020-09-01-17-18-ADMIN | B | Wet | 17 | 1.03280994 | 0.760001 | 0.174826 | 3.04438427 | 0.67796847 | 0.98689092 | 0.68697407 | 0.21037858 | 2 |
| 2020-09-07-07-18-ADMIN | B | Wet | 07 | 1.03192509 | 0.541199 | 0.143478 | 3.22989418 | 0.7045391  | 0.98447548 | 0.71564921 | 0.07290859 | 3 |
| 2020-09-08-12-30-ADMIN | B | Wet | 12 | 1.03653403 | 0.597745 | 0.155787 | 2.06404866 | 0.64826675 | 0.98720341 | 0.65666989 | 0.32233918 | 2 |
| 2020-09-12-17-42-ADMIN | B | Wet | 17 | 1.04335814 | 0.500514 | 0.137339 | 3.46706992 | 0.69279035 | 0.98153374 | 0.70582428 | 0.04155125 | 0 |
| 2020-09-16-16-18-ADMIN | B | Wet | 16 | 1.03004611 | 1.003811 | 0.218399 | 5.35092965 | 0.65585826 | 0.98640028 | 0.66490073 | 0.28100954 | 3 |
| 2020-09-19-09-30-ADMIN | B | Wet | 09 | 1.02067901 | 1.254789 | 0.279029 | 5.57042502 | 0.69585879 | 0.98578512 | 0.70589297 | 0.20176054 | 2 |
| 2020-09-20-12-54-ADMIN | B | Wet | 12 | 1.03503832 | 1.688613 | 0.410068 | 5.54045699 | 0.77853014 | 0.98890774 | 0.78726267 | 0.10518929 | 1 |
| 2020-10-08-07-18-ADMIN | B | Wet | 07 | 1.03542503 | 0.323276 | 0.1192   | 2.58025357 | 0.68069444 | 0.98469692 | 0.69127304 | 0.08386581 | 4 |
| 2020-10-09-05-12-ADMIN | B | Wet | 05 | 1.04989196 | 0.792159 | 0.176315 | 4.36528375 | 0.70741481 | 0.98456626 | 0.71850401 | 0.04924592 | 0 |
| 2020-10-11-05-42-ADMIN | B | Wet | 05 | 1.04436051 | 1.372226 | 0.301157 | 4.59133927 | 0.74493777 | 0.98775983 | 0.75416893 | 0.08322561 | 1 |
| 2020-10-14-17-00-ADMIN | B | Wet | 17 | 1.0316434  | 1.036056 | 0.219701 | 5.93352606 | 0.71959558 | 0.98956841 | 0.72718124 | 0.50607572 | 2 |
| 2020-10-18-06-54-ADMIN | B | Wet | 06 | 1.02912692 | 1.072627 | 0.225893 | 4.8054096  | 0.73290462 | 0.98676802 | 0.74273245 | 0.12345953 | 3 |
| 2020-10-20-18-42-ADMIN | B | Wet | 18 | 1.01965697 | 1.597204 | 0.38821  | 6.88239371 | 0.6915842  | 0.98784353 | 0.70009489 | 0.46357649 | 0 |
| 2020-10-21-07-24-ADMIN | B | Wet | 07 | 1.04661176 | 0.569198 | 0.146109 | 4.146253   | 0.62712116 | 0.98705651 | 0.63534473 | 0.33573407 | 3 |
| 2020-10-21-09-36-ADMIN | B | Wet | 09 | 1.0665852  | 1.176717 | 0.261356 | 6.85631879 | 0.72038009 | 0.97940282 | 0.73552994 | 0.06666667 | 1 |
| 2020-11-03-08-48-ADMIN | B | Dry | 08 | 1.032507   | 0.872811 | 0.191501 | 3.27256734 | 0.6698292  | 0.98966535 | 0.67682394 | 0.68446907 | 2 |
| 2020-11-04-06-36-ADMIN | B | Dry | 06 | 1.05710031 | 0.407345 | 0.127634 | 5.10008508 | 0.61147441 | 0.97452794 | 0.62745703 | 0.02581718 | 5 |
| 2020-11-05-14-06-ADMIN | B | Dry | 14 | 1.02014076 | 1.486504 | 0.33507  | 6.42408639 | 0.73419574 | 0.98937034 | 0.74208385 | 0.53495845 | 1 |
| 2020-11-06-14-30-ADMIN | B | Dry | 14 | 1.0297982  | 0.715778 | 0.164577 | 2.74962027 | 0.67871485 | 0.98665615 | 0.68789401 | 0.18744229 | 2 |

|                        |   |     |    |            |          |          |            |            |            |            |            |   |
|------------------------|---|-----|----|------------|----------|----------|------------|------------|------------|------------|------------|---|
| 2020-11-10-10-42-ADMIN | B | Dry | 10 | 1.0306693  | 0.699791 | 0.166265 | 3.18209009 | 0.66045379 | 0.98924463 | 0.66763444 | 0.62089258 | 2 |
| 2020-11-10-11-42-ADMIN | B | Dry | 11 | 1.03600648 | 0.593151 | 0.148189 | 3.2583541  | 0.68203543 | 0.98463528 | 0.69267824 | 0.10360111 | 1 |
| 2020-11-10-12-00-ADMIN | B | Dry | 12 | 1.03786003 | 0.561277 | 0.145072 | 2.45727667 | 0.65206924 | 0.98708617 | 0.66060011 | 0.26376116 | 2 |
| 2020-11-11-13-00-ADMIN | B | Dry | 13 | 1.02747568 | 1.617756 | 0.393244 | 7.14307305 | 0.75165576 | 0.98619296 | 0.76217919 | 0.21707602 | 0 |
| 2020-11-18-18-12-ADMIN | B | Dry | 18 | 1.03513907 | 1.042095 | 0.217418 | 2.69748423 | 0.67929526 | 0.99058533 | 0.68575138 | 0.50293629 | 0 |
| 2020-11-19-11-18-ADMIN | B | Dry | 11 | 1.03638851 | 0.955408 | 0.204472 | 5.60816309 | 0.64636635 | 0.99037824 | 0.65264595 | 0.87985226 | 3 |
| 2020-11-21-05-24-ADMIN | B | Dry | 05 | 1.03790203 | 0.8528   | 0.185112 | 3.66477577 | 0.71082111 | 0.98675249 | 0.72036415 | 0.06497999 | 0 |
| 2020-11-23-15-00-ADMIN | B | Dry | 15 | 1.0329524  | 0.648911 | 0.15664  | 2.84949228 | 0.66935622 | 0.98892984 | 0.67684905 | 0.44813789 | 2 |
| 2020-11-24-16-06-ADMIN | B | Dry | 16 | 1.03161123 | 0.887965 | 0.199214 | 7.33374739 | 0.71129964 | 0.98762583 | 0.72021166 | 0.29311173 | 3 |
| 2020-11-25-10-18-ADMIN | B | Dry | 10 | 1.02212635 | 1.371742 | 0.306601 | 6.00994846 | 0.72726415 | 0.98879557 | 0.73550507 | 0.55578947 | 1 |
| 2020-11-25-12-48-ADMIN | B | Dry | 12 | 1.03810347 | 0.915768 | 0.198996 | 3.55555981 | 0.65659459 | 0.99035754 | 0.66298742 | 0.80683287 | 4 |
| 2020-11-26-07-18-ADMIN | B | Dry | 07 | 1.03219726 | 0.970207 | 0.207372 | 3.62781159 | 0.71943875 | 0.98984396 | 0.72682037 | 0.28183441 | 3 |
| 2020-11-26-07-30-ADMIN | B | Dry | 07 | 1.03356787 | 0.555997 | 0.143155 | 3.07703489 | 0.70009036 | 0.98847565 | 0.70825251 | 0.22850108 | 4 |
| 2020-11-27-05-48-ADMIN | B | Dry | 05 | 1.03744702 | 0.604897 | 0.14924  | 1.82738052 | 0.71588594 | 0.98905031 | 0.72381145 | 0.0833241  | 1 |
| 2020-11-27-15-30-ADMIN | B | Dry | 15 | 1.03792083 | 0.547915 | 0.144125 | 2.33417715 | 0.65939413 | 0.98847176 | 0.66708445 | 0.37388735 | 2 |
| 2020-11-30-18-12-ADMIN | B | Dry | 18 | 1.03787804 | 0.551274 | 0.141828 | 2.96271719 | 0.68266932 | 0.98667203 | 0.69189082 | 0.12162512 | 0 |
| 2020-12-01-12-00-ADMIN | B | Dry | 12 | 1.03340378 | 0.91718  | 0.200148 | 6.19790094 | 0.64999679 | 0.99015079 | 0.65646242 | 0.84333641 | 0 |
| 2020-12-04-18-06-ADMIN | B | Dry | 18 | 1.03866341 | 0.551932 | 0.141866 | 4.33132405 | 0.68386511 | 0.98712163 | 0.69278708 | 0.18181594 | 0 |
| 2020-12-06-16-30-ADMIN | B | Dry | 16 | 1.04011596 | 0.646389 | 0.158324 | 5.62585512 | 0.68903784 | 0.98948745 | 0.69635834 | 0.37675593 | 2 |
| 2020-12-06-17-30-ADMIN | B | Dry | 17 | 1.02880113 | 0.567351 | 0.144089 | 5.28842048 | 0.69220851 | 0.98885393 | 0.70001089 | 0.39652816 | 0 |
| 2020-12-09-09-42-ADMIN | B | Dry | 09 | 1.03487522 | 0.768586 | 0.173993 | 5.00066285 | 0.66712161 | 0.98680478 | 0.67604214 | 0.29742075 | 1 |
| 2020-12-12-05-48-ADMIN | B | Dry | 05 | 1.03794801 | 0.928697 | 0.197534 | 2.31948028 | 0.69841682 | 0.98973399 | 0.70566114 | 0.27629424 | 1 |
| 2020-12-14-11-36-ADMIN | B | Dry | 11 | 1.03651354 | 0.728444 | 0.164374 | 4.73577297 | 0.62968984 | 0.98258566 | 0.64084982 | 0.10190212 | 1 |
| 2020-12-20-18-48-ADMIN | B | Dry | 18 | 1.03590427 | 0.963432 | 0.204647 | 2.35685838 | 0.6776321  | 0.99027718 | 0.68428528 | 0.48590951 | 2 |
| 2020-12-21-10-48-ADMIN | B | Dry | 10 | 1.04156194 | 0.677855 | 0.160479 | 2.59052352 | 0.65656918 | 0.98931167 | 0.66366262 | 0.54879655 | 4 |
| 2020-12-21-10-54-ADMIN | B | Dry | 10 | 1.04277979 | 0.530311 | 0.141331 | 2.54875344 | 0.65905572 | 0.98742185 | 0.66745102 | 0.29307479 | 5 |
| 2020-12-23-11-30-ADMIN | B | Dry | 11 | 1.03959542 | 0.662099 | 0.158295 | 4.29720914 | 0.64358207 | 0.98749617 | 0.6517312  | 0.38643275 | 2 |
| 2020-12-25-12-00-ADMIN | B | Dry | 12 | 1.03365588 | 0.678851 | 0.159927 | 2.46713161 | 0.69463528 | 0.98744368 | 0.70346825 | 0.18137273 | 3 |

|                        |   |     |    |            |          |          |            |            |            |            |            |   |
|------------------------|---|-----|----|------------|----------|----------|------------|------------|------------|------------|------------|---|
| 2020-12-30-08-12-ADMIN | B | Dry | 08 | 1.04211125 | 1.183232 | 0.255751 | 5.31473204 | 0.71314204 | 0.98946387 | 0.72073581 | 0.27535857 | 2 |
| 2020-12-30-13-30-ADMIN | B | Dry | 13 | 1.036485   | 0.67518  | 0.163261 | 2.16932868 | 0.68482655 | 0.98892253 | 0.69249767 | 0.2842844  | 3 |
| 2021-01-06-12-06-ADMIN | B | Dry | 12 | 1.03354543 | 0.814805 | 0.180886 | 3.29169364 | 0.63651189 | 0.98977691 | 0.64308622 | 0.74227147 | 0 |
| 2021-01-07-06-30-ADMIN | B | Dry | 06 | 1.03764547 | 0.701898 | 0.161722 | 4.77996856 | 0.67928027 | 0.9835732  | 0.69062503 | 0.06696214 | 1 |
| 2021-01-12-11-54-ADMIN | B | Dry | 11 | 1.03254332 | 0.562607 | 0.145339 | 2.33616019 | 0.67227894 | 0.98907754 | 0.67970296 | 0.44444444 | 4 |
| 2021-01-12-13-36-ADMIN | B | Dry | 13 | 1.02989117 | 0.789297 | 0.175761 | 6.05326502 | 0.65998065 | 0.97874838 | 0.67431084 | 0.04033241 | 2 |
| 2021-01-13-14-42-ADMIN | B | Dry | 14 | 1.02717958 | 0.661446 | 0.161    | 2.2412199  | 0.68556646 | 0.98901395 | 0.69318179 | 0.39869498 | 2 |
| 2021-01-15-13-12-ADMIN | B | Dry | 13 | 1.02834433 | 0.903898 | 0.193565 | 3.06187074 | 0.67256622 | 0.98980168 | 0.67949593 | 0.60786704 | 4 |
| 2021-01-18-08-00-ADMIN | B | Dry | 08 | 1.02836498 | 0.81695  | 0.178961 | 2.97580724 | 0.73089917 | 0.98916056 | 0.73890852 | 0.13068637 | 4 |
| 2021-01-23-15-54-ADMIN | B | Dry | 15 | 1.02540905 | 0.872278 | 0.192865 | 1.61806943 | 0.72688193 | 0.99003887 | 0.73419535 | 0.17192983 | 5 |
| 2021-01-25-07-06-ADMIN | B | Dry | 07 | 1.02940417 | 1.155095 | 0.24463  | 3.39548659 | 0.7062694  | 0.99040014 | 0.71311152 | 0.5313635  | 4 |
| 2021-02-15-11-24-ADMIN | B | Dry | 11 | 1.03163552 | 0.782975 | 0.17349  | 4.27718897 | 0.68686159 | 0.98954144 | 0.6941211  | 0.60615574 | 5 |
| 2021-02-15-13-18-ADMIN | B | Dry | 13 | 1.02905045 | 0.822291 | 0.180412 | 2.77332276 | 0.69460455 | 0.98774045 | 0.70322579 | 0.21281625 | 2 |
| 2021-02-15-18-12-ADMIN | B | Dry | 18 | 1.0362167  | 0.56157  | 0.144661 | 4.19947825 | 0.69692355 | 0.98291018 | 0.70904093 | 0.04022161 | 1 |
| 2021-02-16-06-18-ADMIN | B | Dry | 06 | 1.03756252 | 0.575967 | 0.145174 | 4.13759898 | 0.65722545 | 0.98220228 | 0.66913452 | 0.07069252 | 4 |
| 2021-02-17-07-30-ADMIN | B | Dry | 07 | 1.03681891 | 1.01062  | 0.214018 | 3.15420562 | 0.69743202 | 0.98930389 | 0.70497248 | 0.40709141 | 4 |
| 2021-02-17-17-00-ADMIN | B | Dry | 17 | 1.03070956 | 0.883692 | 0.19021  | 3.05464261 | 0.73028828 | 0.98918895 | 0.73826974 | 0.16241305 | 2 |
| 2021-02-18-15-24-ADMIN | B | Dry | 15 | 1.03632361 | 0.829185 | 0.182704 | 4.79063798 | 0.6595169  | 0.98113448 | 0.67219826 | 0.07032318 | 1 |
| 2021-02-18-16-00-ADMIN | B | Dry | 16 | 1.02842463 | 0.636227 | 0.154358 | 3.83305374 | 0.71029027 | 0.98687554 | 0.71973642 | 0.15204678 | 2 |
| 2021-02-20-07-24-ADMIN | B | Dry | 07 | 1.02041541 | 0.752458 | 0.168367 | 3.4591609  | 0.73055695 | 0.98784715 | 0.73954452 | 0.13628809 | 4 |
| 2021-02-20-16-42-ADMIN | B | Dry | 16 | 1.03067136 | 0.936648 | 0.203202 | 2.18482515 | 0.72689847 | 0.99065738 | 0.73375366 | 0.23021237 | 1 |
| 2021-02-20-17-12-ADMIN | B | Dry | 17 | 1.02982759 | 0.98489  | 0.208815 | 2.85920018 | 0.71889125 | 0.98809985 | 0.7275492  | 0.13210219 | 2 |
| 2021-02-20-17-18-ADMIN | B | Dry | 17 | 1.03098925 | 1.358505 | 0.296995 | 2.84382103 | 0.74217707 | 0.98938413 | 0.75014047 | 0.07571561 | 4 |
| 2021-02-20-17-36-ADMIN | B | Dry | 17 | 1.03201492 | 1.08764  | 0.23306  | 2.07999936 | 0.74274144 | 0.99042279 | 0.74992362 | 0.10967067 | 3 |
| 2021-02-21-10-48-ADMIN | B | Dry | 10 | 1.03257477 | 0.777941 | 0.174147 | 2.72121507 | 0.73597628 | 0.98827842 | 0.74470541 | 0.03718067 | 4 |
| 2021-02-22-18-42-ADMIN | B | Dry | 18 | 1.03323572 | 1.11406  | 0.233113 | 2.92122617 | 0.71067044 | 0.98955102 | 0.71817463 | 0.22813173 | 0 |
| 2021-02-23-06-00-ADMIN | B | Dry | 06 | 1.03581745 | 0.644279 | 0.15288  | 2.92909701 | 0.72341802 | 0.98135957 | 0.73715898 | 0.00523238 | 2 |
| 2021-02-23-13-36-ADMIN | B | Dry | 13 | 1.04170022 | 0.378809 | 0.124093 | 4.72874073 | 0.62150389 | 0.97937821 | 0.63459027 | 0.0600554  | 3 |

|                        |   |     |    |            |          |          |            |            |            |            |            |   |
|------------------------|---|-----|----|------------|----------|----------|------------|------------|------------|------------|------------|---|
| 2021-02-24-08-00-ADMIN | B | Dry | 08 | 1.03788205 | 0.983707 | 0.209136 | 3.90921917 | 0.6792816  | 0.98695512 | 0.68825987 | 0.24733764 | 5 |
| 2021-02-25-11-18-ADMIN | B | Dry | 11 | 1.03480956 | 0.765813 | 0.176641 | 2.99933854 | 0.67618121 | 0.98972609 | 0.68320035 | 0.52819945 | 5 |
| 2021-02-26-15-18-ADMIN | B | Dry | 15 | 1.03014436 | 0.78231  | 0.178255 | 3.11012956 | 0.67214273 | 0.98948734 | 0.67928381 | 0.60576177 | 3 |
| 2021-02-27-08-36-ADMIN | B | Dry | 08 | 1.03129955 | 0.598799 | 0.149324 | 2.88548366 | 0.71559129 | 0.98776745 | 0.7244532  | 0.13386273 | 4 |
| 2021-02-27-10-30-ADMIN | B | Dry | 10 | 1.03709582 | 0.395671 | 0.126404 | 2.49033441 | 0.70242599 | 0.98637858 | 0.71212616 | 0.08576177 | 5 |
| 2021-02-28-08-06-ADMIN | B | Dry | 08 | 1.03399859 | 0.557821 | 0.144254 | 2.17392361 | 0.70114959 | 0.98944581 | 0.70862858 | 0.26888273 | 6 |
| 2021-03-02-14-24-ADMIN | B | Dry | 14 | 1.02970764 | 1.035979 | 0.223782 | 4.4879462  | 0.69440994 | 0.98846385 | 0.70251425 | 0.35791936 | 6 |
| 2021-03-02-15-00-ADMIN | B | Dry | 15 | 1.02778362 | 0.515147 | 0.138816 | 2.7411805  | 0.66361353 | 0.98351965 | 0.67473337 | 0.08686981 | 5 |
| 2021-03-03-11-00-ADMIN | B | Dry | 11 | 1.0303925  | 0.757633 | 0.172988 | 4.85622953 | 0.66492449 | 0.98417732 | 0.67561452 | 0.13591874 | 6 |
| 2021-03-03-16-24-ADMIN | B | Dry | 16 | 1.03177331 | 0.58344  | 0.148289 | 2.17715096 | 0.67606163 | 0.98270493 | 0.68795994 | 0.06776239 | 5 |
| 2021-03-03-17-30-ADMIN | B | Dry | 17 | 1.02875031 | 0.954887 | 0.209618 | 2.96792241 | 0.72855678 | 0.98901443 | 0.73664929 | 0.21181902 | 2 |
| 2021-03-03-18-18-ADMIN | B | Dry | 18 | 1.03834682 | 0.605646 | 0.149687 | 2.70870906 | 0.68163231 | 0.98517663 | 0.69188843 | 0.09473684 | 3 |
| 2021-03-04-17-36-ADMIN | B | Dry | 17 | 1.02751195 | 0.879754 | 0.195286 | 2.79102234 | 0.68730778 | 0.98998703 | 0.69425938 | 0.61628809 | 1 |
| 2021-03-05-10-42-ADMIN | B | Dry | 10 | 1.02511774 | 0.757568 | 0.17502  | 3.02406831 | 0.68775299 | 0.98959137 | 0.69498685 | 0.58762696 | 4 |
| 2021-03-06-07-12-ADMIN | B | Dry | 07 | 1.02357607 | 1.35887  | 0.297255 | 4.17175755 | 0.76172481 | 0.98910511 | 0.77011514 | 0.11052016 | 6 |
| 2021-03-06-10-48-ADMIN | B | Dry | 10 | 1.02460913 | 1.028631 | 0.216846 | 3.47770276 | 0.7259798  | 0.98941601 | 0.73374576 | 0.27400431 | 5 |
| 2021-03-06-13-00-ADMIN | B | Dry | 13 | 1.02529347 | 1.277993 | 0.275783 | 2.40474923 | 0.71905564 | 0.99068861 | 0.72581398 | 0.37979686 | 7 |
| 2021-03-06-17-12-ADMIN | B | Dry | 17 | 1.02311861 | 0.743864 | 0.173379 | 2.14563651 | 0.69599485 | 0.98972668 | 0.70321924 | 0.48842105 | 2 |
| 2021-03-10-07-30-ADMIN | B | Dry | 07 | 1.01689997 | 1.493365 | 0.342472 | 4.82313627 | 0.70957674 | 0.99046958 | 0.71640437 | 0.72754694 | 6 |
| 2021-03-10-13-36-ADMIN | B | Dry | 13 | 1.01358777 | 1.510294 | 0.3456   | 5.61253321 | 0.70671302 | 0.99046907 | 0.71351347 | 0.82555863 | 3 |
| 2021-03-12-17-00-ADMIN | B | Dry | 17 | 1.02606191 | 1.037853 | 0.220115 | 2.22318022 | 0.73448641 | 0.99056734 | 0.74148055 | 0.19649123 | 3 |
| 2021-03-13-12-06-ADMIN | B | Dry | 12 | 1.02911689 | 0.856048 | 0.190381 | 2.35626533 | 0.72578382 | 0.98940912 | 0.7335528  | 0.17074792 | 6 |
| 2021-03-15-14-12-ADMIN | B | Dry | 14 | 1.02649944 | 0.958496 | 0.206281 | 4.08544976 | 0.69489806 | 0.98379644 | 0.70634334 | 0.07623269 | 4 |
| 2021-03-16-08-12-ADMIN | B | Dry | 08 | 1.01753796 | 1.095546 | 0.228163 | 6.02974254 | 0.7313923  | 0.98874706 | 0.73971628 | 0.4178024  | 3 |
| 2021-03-16-09-30-ADMIN | B | Dry | 09 | 1.03722037 | 0.872343 | 0.192599 | 8.65485472 | 0.72151517 | 0.98474739 | 0.73269061 | 0.1004863  | 2 |
| 2021-03-16-12-18-ADMIN | B | Dry | 12 | 1.03838514 | 0.58437  | 0.149604 | 3.03052907 | 0.65571643 | 0.98782143 | 0.66380057 | 0.42245614 | 4 |
| 2021-03-17-05-48-ADMIN | B | Dry | 05 | 1.041481   | 1.180322 | 0.249398 | 5.22971932 | 0.73943106 | 0.9872863  | 0.74895302 | 0.08938135 | 4 |
| 2021-03-17-11-18-ADMIN | B | Dry | 11 | 1.02428456 | 0.965383 | 0.206155 | 4.09830852 | 0.68238827 | 0.98825035 | 0.69050142 | 0.42105263 | 5 |

|                        |   |     |    |            |          |          |            |            |            |            |            |   |
|------------------------|---|-----|----|------------|----------|----------|------------|------------|------------|------------|------------|---|
| 2021-03-18-10-00-ADMIN | B | Dry | 10 | 1.03091801 | 0.860208 | 0.188114 | 2.88350082 | 0.69408621 | 0.98819372 | 0.70237869 | 0.24975069 | 5 |
| 2021-03-20-09-12-ADMIN | B | Dry | 09 | 1.02829802 | 1.078783 | 0.230457 | 3.80191785 | 0.71925129 | 0.98887927 | 0.72733984 | 0.18958449 | 4 |
| 2021-03-22-05-48-ADMIN | B | Dry | 05 | 1.03321769 | 1.259389 | 0.269911 | 3.9302874  | 0.71409266 | 0.98706174 | 0.72345289 | 0.09920591 | 4 |
| 2021-03-23-08-48-ADMIN | B | Dry | 08 | 1.02800692 | 0.879584 | 0.193812 | 3.04057276 | 0.74041975 | 0.99012531 | 0.74780408 | 0.13739612 | 4 |
| 2021-03-24-10-54-ADMIN | B | Dry | 10 | 1.03106415 | 0.577338 | 0.146194 | 3.01271199 | 0.65215907 | 0.98747117 | 0.66043353 | 0.36155125 | 4 |
| 2021-03-24-16-12-ADMIN | B | Dry | 16 | 1.02746202 | 0.886017 | 0.193982 | 2.9465907  | 0.70258702 | 0.98931811 | 0.71017302 | 0.40336103 | 4 |
| 2021-03-25-13-00-ADMIN | B | Dry | 13 | 1.02105003 | 0.933416 | 0.204616 | 5.01694711 | 0.69571023 | 0.98704118 | 0.70484418 | 0.24992305 | 4 |
| 2021-03-27-05-30-ADMIN | B | Dry | 05 | 1.03244525 | 1.127486 | 0.236987 | 2.80415701 | 0.75469762 | 0.98731501 | 0.76439395 | 0.01229917 | 3 |
| 2021-03-27-14-00-ADMIN | B | Dry | 14 | 1.02387002 | 0.674935 | 0.162067 | 2.50723062 | 0.71241618 | 0.98920636 | 0.72018965 | 0.28473992 | 6 |
| 2021-03-27-18-30-ADMIN | B | Dry | 18 | 1.02637637 | 0.859745 | 0.188375 | 2.16682949 | 0.72322248 | 0.98987535 | 0.73061975 | 0.23734072 | 2 |
| 2021-03-28-18-54-ADMIN | B | Dry | 18 | 1.02809573 | 0.623609 | 0.152851 | 1.82013302 | 0.7012293  | 0.9880959  | 0.70967737 | 0.16842105 | 0 |
| 2021-03-31-05-06-ADMIN | B | Dry | 05 | 1.03450743 | 0.765254 | 0.169512 | 1.62436469 | 0.75706802 | 0.98829691 | 0.76603297 | 0.00748538 | 1 |
| 2021-03-31-12-12-ADMIN | B | Dry | 12 | 1.02865546 | 0.754965 | 0.172695 | 1.58434359 | 0.73908879 | 0.98954324 | 0.74689893 | 0.09307479 | 6 |
| 2021-04-07-17-00-ADMIN | B | Dry | 17 | 1.03197028 | 0.980319 | 0.212561 | 3.04950731 | 0.70210056 | 0.98634477 | 0.71182063 | 0.12606956 | 4 |
| 2021-04-08-11-30-ADMIN | B | Dry | 11 | 1.0278387  | 1.096134 | 0.23537  | 3.33419566 | 0.71570834 | 0.98954486 | 0.72327023 | 0.37402278 | 6 |
| 2021-04-08-14-48-ADMIN | B | Dry | 14 | 1.02341484 | 0.793912 | 0.182135 | 1.7849612  | 0.73271926 | 0.99072753 | 0.73957697 | 0.21926747 | 6 |
| 2021-04-08-16-06-ADMIN | B | Dry | 16 | 1.03163095 | 0.702277 | 0.163755 | 3.15949614 | 0.6822577  | 0.98544055 | 0.69233776 | 0.12899969 | 3 |
| 2021-04-10-06-24-ADMIN | B | Dry | 06 | 1.02787236 | 0.873868 | 0.192418 | 3.44377804 | 0.76584109 | 0.98555763 | 0.77706374 | 0.00465374 | 4 |
| 2021-04-10-12-48-ADMIN | B | Dry | 12 | 1.02273959 | 1.6534   | 0.409867 | 2.59305335 | 0.7838913  | 0.98980972 | 0.79196161 | 0.01446599 | 3 |
| 2021-04-12-10-18-ADMIN | B | Dry | 10 | 1.02361568 | 1.276777 | 0.281717 | 2.07376679 | 0.7254646  | 0.99059578 | 0.7323518  | 0.33324715 | 5 |
| 2021-04-12-11-06-ADMIN | B | Dry | 11 | 1.01908794 | 1.153773 | 0.255785 | 2.15504821 | 0.72289617 | 0.99061054 | 0.72974811 | 0.37754386 | 4 |
| 2021-04-12-15-00-ADMIN | B | Dry | 15 | 1.02089423 | 1.129981 | 0.248468 | 2.49618362 | 0.76489571 | 0.98959244 | 0.77294014 | 0.05765466 | 5 |
| 2021-04-15-06-24-ADMIN | B | Dry | 06 | 1.02594062 | 0.858651 | 0.187278 | 2.41917148 | 0.75478986 | 0.98939555 | 0.76287978 | 0.03804248 | 3 |
| 2021-04-15-10-12-ADMIN | B | Dry | 10 | 1.0305946  | 1.024388 | 0.218321 | 4.03044964 | 0.6895952  | 0.98566069 | 0.69962737 | 0.14930132 | 4 |
| 2021-04-16-05-36-ADMIN | B | Dry | 05 | 1.03911154 | 1.994047 | 0.58263  | 5.03280633 | 0.79121129 | 0.98955971 | 0.79955892 | 0.02979378 | 6 |
| 2021-04-16-14-06-ADMIN | B | Dry | 14 | 1.02461442 | 0.803575 | 0.179218 | 3.23798253 | 0.72112171 | 0.98818268 | 0.72974534 | 0.21929209 | 2 |
| 2021-04-17-09-24-ADMIN | B | Dry | 09 | 1.03663713 | 1.179506 | 0.254997 | 4.75727307 | 0.73985098 | 0.98795767 | 0.74886911 | 0.14168052 | 4 |
| 2021-04-18-12-54-ADMIN | B | Dry | 12 | 1.02521661 | 1.487708 | 0.334761 | 3.58550659 | 0.79362378 | 0.98564667 | 0.80518081 | 0.00162512 | 5 |

|                        |   |     |    |            |          |          |            |            |            |            |            |   |
|------------------------|---|-----|----|------------|----------|----------|------------|------------|------------|------------|------------|---|
| 2021-04-20-14-54-ADMIN | B | Dry | 14 | 1.04026373 | 0.50289  | 0.13977  | 3.41553376 | 0.59369806 | 0.98346085 | 0.60368245 | 0.12151431 | 2 |
| 2021-04-21-10-48-ADMIN | B | Dry | 10 | 1.0167081  | 1.264533 | 0.271276 | 5.03623557 | 0.74059792 | 0.98658332 | 0.75066942 | 0.22869806 | 2 |
| 2021-04-21-11-18-ADMIN | B | Dry | 11 | 1.02988329 | 0.588386 | 0.147584 | 4.39189239 | 0.7046928  | 0.97892763 | 0.719862   | 0.02566944 | 4 |
| 2021-05-21-14-00-ADMIN | B | Wet | 14 | 1.02250069 | 0.939661 | 0.199917 | 4.76929343 | 0.69032686 | 0.98378281 | 0.70170657 | 0.11912589 | 0 |
| 2021-05-22-13-06-ADMIN | B | Wet | 13 | 1.02552077 | 0.401389 | 0.137714 | 6.82492705 | 0.74816449 | 0.97913072 | 0.76411093 | 0.04060326 | 0 |
| 2021-05-23-09-00-ADMIN | B | Wet | 09 | 1.018897   | 1.663771 | 0.412701 | 7.68710921 | 0.81885925 | 0.9865053  | 0.83006067 | 0.06308403 | 1 |
| 2021-05-23-09-24-ADMIN | B | Wet | 09 | 1.02171578 | 1.652379 | 0.417709 | 6.75642102 | 0.79113891 | 0.98608672 | 0.80230155 | 0.09292705 | 3 |
| 2021-05-23-18-18-ADMIN | B | Wet | 18 | 1.03111898 | 1.562808 | 0.396197 | 4.30131353 | 0.73486757 | 0.98914438 | 0.74293257 | 0.21037858 | 2 |
| 2021-06-25-16-42-ADMIN | B | Wet | 16 | 1.03171215 | 0.986572 | 0.208874 | 3.20786513 | 0.72727802 | 0.98820468 | 0.73595889 | 0.10203755 | 1 |
| 2021-06-26-06-12-ADMIN | B | Wet | 06 | 1.02915513 | 1.69415  | 0.42198  | 6.16618875 | 0.80315546 | 0.98892816 | 0.81214743 | 0.09750693 | 4 |
| 2021-06-26-15-00-ADMIN | B | Wet | 15 | 1.03395616 | 0.717852 | 0.166392 | 4.24888703 | 0.70918995 | 0.98712742 | 0.71843811 | 0.11634349 | 1 |
| 2021-06-26-16-54-ADMIN | B | Wet | 16 | 1.03340051 | 1.839892 | 0.497509 | 4.01143699 | 0.77150736 | 0.98979076 | 0.77946511 | 0.0628378  | 4 |
| 2021-06-28-10-36-ADMIN | B | Wet | 10 | 1.028952   | 0.082264 | 0.103209 | 4.36642946 | 0.61564697 | 0.97980989 | 0.62833308 | 0.06773777 | 3 |
| 2021-06-28-13-24-ADMIN | B | Wet | 13 | 1.02522299 | 0.068512 | 0.10256  | 4.94732422 | 0.57734189 | 0.97237958 | 0.59374127 | 0.02747922 | 0 |
| 2021-06-28-15-12-ADMIN | B | Wet | 15 | 1.02849458 | 0.128201 | 0.105603 | 6.76471679 | 0.6956104  | 0.9873982  | 0.70448822 | 0.31580179 | 2 |
| 2021-06-28-18-18-ADMIN | B | Wet | 18 | 1.03115437 | 0.066616 | 0.102581 | 4.06948239 | 0.68348189 | 0.98475124 | 0.69406553 | 0.10038781 | 4 |
| 2021-06-29-07-30-ADMIN | B | Wet | 07 | 1.02041242 | 0.486555 | 0.135566 | 7.59734431 | 0.80002811 | 0.98372225 | 0.81326625 | 0.06549708 | 3 |
| 2021-06-29-13-00-ADMIN | B | Wet | 13 | 1.03030912 | 0.108958 | 0.104554 | 4.78571719 | 0.72212864 | 0.98530676 | 0.73289728 | 0.07844875 | 4 |
| 2021-07-02-08-06-ADMIN | B | Wet | 08 | 1.03105469 | 1.761058 | 0.457852 | 5.66659465 | 0.71394765 | 0.98670907 | 0.7235645  | 0.27146814 | 3 |
| 2021-07-02-09-36-ADMIN | B | Wet | 09 | 1.02477547 | 1.72612  | 0.435274 | 7.82224401 | 0.75602702 | 0.9796621  | 0.77172223 | 0.06008003 | 2 |
| 2021-07-02-09-48-ADMIN | B | Wet | 09 | 1.01712348 | 1.564763 | 0.385292 | 6.85381666 | 0.75743615 | 0.97893559 | 0.77373441 | 0.04767005 | 3 |
| 2021-07-03-18-24-ADMIN | B | Wet | 18 | 1.03676322 | 0.862429 | 0.185075 | 6.39334778 | 0.70247357 | 0.95923403 | 0.73232762 | 0.00380425 | 3 |
| 2021-07-04-14-12-ADMIN | B | Wet | 14 | 1.0258985  | 0.863247 | 0.208343 | 5.94111551 | 0.74264937 | 0.98847599 | 0.75130744 | 0.41625115 | 1 |
| 2021-07-05-12-42-ADMIN | B | Wet | 12 | 1.0538015  | 0.931905 | 0.198299 | 9.05381475 | 0.68799707 | 0.95155491 | 0.72302403 | 0.00220376 | 2 |
| 2021-07-05-17-36-ADMIN | B | Wet | 17 | 1.02881582 | 1.380246 | 0.30555  | 5.94238793 | 0.70652957 | 0.98995587 | 0.71369805 | 0.74770083 | 2 |
| 2021-07-07-12-48-ADMIN | B | Wet | 12 | 1.03283857 | 0.680786 | 0.161172 | 3.98222901 | 0.64984272 | 0.99086073 | 0.65583659 | 0.91074177 | 2 |
| 2021-07-09-08-18-ADMIN | B | Wet | 08 | 1.01875961 | 2.044307 | 0.604912 | 6.85386438 | 0.73934433 | 0.98870861 | 0.74778789 | 0.50683903 | 2 |
| 2021-07-10-06-12-ADMIN | B | Wet | 06 | 1.03048352 | 0.681169 | 0.162434 | 5.14320321 | 0.71569022 | 0.98149764 | 0.72918181 | 0.05537704 | 2 |



|                        |   |     |    |            |          |          |            |            |            |            |            |   |
|------------------------|---|-----|----|------------|----------|----------|------------|------------|------------|------------|------------|---|
| 2021-07-10-07-24-ADMIN | B | Wet | 07 | 1.01722074 | 1.86328  | 0.509767 | 5.72498337 | 0.76392508 | 0.98869924 | 0.77265668 | 0.23219452 | 3 |
| 2021-07-11-06-06-ADMIN | B | Wet | 06 | 1.03483718 | 1.306274 | 0.285271 | 3.48185221 | 0.73062004 | 0.98903231 | 0.73872212 | 0.16345953 | 4 |
| 2021-07-13-16-24-ADMIN | B | Wet | 16 | 1.02148809 | 0.683015 | 0.162194 | 2.71619817 | 0.6903388  | 0.98947176 | 0.69768419 | 0.48285626 | 4 |
| 2021-07-13-17-00-ADMIN | B | Wet | 17 | 1.01249161 | 1.58942  | 0.382432 | 9.55523484 | 0.7662874  | 0.99109414 | 0.77317317 | 0.90877193 | 2 |
| 2021-07-15-05-36-ADMIN | B | Wet | 05 | 1.02506878 | 0.330341 | 0.120947 | 7.17095912 | 0.76099851 | 0.9875245  | 0.77061228 | 0.15512465 | 3 |
| 2021-07-17-10-00-ADMIN | B | Wet | 10 | 1.01774161 | 0.627085 | 0.161895 | 7.04237105 | 0.76856654 | 0.98858098 | 0.77744419 | 0.36299169 | 2 |
| 2021-07-17-12-36-ADMIN | B | Wet | 12 | 1.02950508 | 0.003088 | 0.100069 | 2.78436642 | 0.70098966 | 0.9874133  | 0.70992527 | 0.17263158 | 4 |
| 2021-07-17-18-30-ADMIN | B | Wet | 18 | 1.02014807 | 0.754849 | 0.182667 | 8.76049585 | 0.76574842 | 0.9865472  | 0.77619035 | 0.25429363 | 0 |
| 2021-07-18-10-30-ADMIN | B | Wet | 10 | 1.03142999 | 0.192247 | 0.109565 | 2.89588767 | 0.70627197 | 0.98454391 | 0.71735954 | 0.04550323 | 3 |
| 2021-07-18-12-06-ADMIN | B | Wet | 12 | 1.0324551  | 0.027666 | 0.100867 | 2.61514669 | 0.69712365 | 0.98530294 | 0.70752214 | 0.06569406 | 3 |
| 2021-07-18-14-30-ADMIN | B | Wet | 14 | 1.03142343 | 0.054299 | 0.101922 | 4.97453865 | 0.56600346 | 0.96422972 | 0.58700063 | 0.01280394 | 2 |
| 2021-07-18-15-00-ADMIN | B | Wet | 15 | 1.03171795 | 0.018438 | 0.100532 | 3.0962917  | 0.58353727 | 0.96753921 | 0.60311485 | 0.01602955 | 2 |
| 2021-07-20-09-00-ADMIN | B | Wet | 09 | 1.03504141 | 0.166739 | 0.109046 | 4.27096315 | 0.69794882 | 0.98627465 | 0.70766172 | 0.08558941 | 5 |
| 2021-07-20-16-54-ADMIN | B | Wet | 16 | 1.01542067 | 0.663245 | 0.157724 | 8.79635104 | 0.73496273 | 0.98012459 | 0.74986664 | 0.05660819 | 1 |
| 2021-07-21-11-36-ADMIN | B | Wet | 11 | 1.01635021 | 0.573961 | 0.151776 | 6.27881647 | 0.68908056 | 0.98831327 | 0.69722889 | 0.5198892  | 0 |
| 2021-07-21-15-00-ADMIN | B | Wet | 15 | 1.0344414  | 0.034257 | 0.101106 | 2.16280237 | 0.65676963 | 0.98539286 | 0.66650537 | 0.10889505 | 2 |
| 2021-07-23-05-42-ADMIN | B | Wet | 05 | 1.03268902 | 0.011329 | 0.100372 | 4.87854797 | 0.73399636 | 0.98331335 | 0.74645215 | 0.0171622  | 3 |
| 2021-07-24-10-42-ADMIN | B | Wet | 10 | 1.02568691 | 0.208499 | 0.110646 | 6.24359846 | 0.72537677 | 0.9878039  | 0.73433277 | 0.35752539 | 3 |
| 2021-07-24-13-18-ADMIN | B | Wet | 13 | 1.02663336 | 0.072785 | 0.102759 | 4.36693804 | 0.67723148 | 0.98591578 | 0.68690601 | 0.18603878 | 4 |
| 2021-07-26-16-00-ADMIN | B | Wet | 16 | 1.02953647 | 0.80598  | 0.199011 | 9.32484422 | 0.70020858 | 0.98102034 | 0.71375542 | 0.07871961 | 1 |
| 2021-07-27-18-00-ADMIN | B | Wet | 18 | 1.04544472 | 0.145735 | 0.107216 | 3.48549718 | 0.62761228 | 0.97745739 | 0.64208659 | 0.03825177 | 2 |
| 2021-07-29-11-30-ADMIN | B | Wet | 11 | 1.0381292  | 0.462761 | 0.133179 | 3.53537977 | 0.62911357 | 0.98601795 | 0.6380346  | 0.22989228 | 3 |
| 2021-07-30-09-00-ADMIN | B | Wet | 09 | 1.02469006 | 1.279707 | 0.279741 | 5.56553499 | 0.69126831 | 0.98960875 | 0.69852687 | 0.68944291 | 2 |
| 2021-08-04-06-54-ADMIN | B | Wet | 06 | 1.03476054 | 0.296656 | 0.117306 | 3.76682753 | 0.66393547 | 0.98505047 | 0.67401163 | 0.1461619  | 5 |
| 2021-08-04-18-30-ADMIN | B | Wet | 18 | 1.03356962 | 0.457888 | 0.133906 | 7.81236326 | 0.61163417 | 0.9657022  | 0.63335692 | 0.01649738 | 0 |
| 2021-08-05-16-00-ADMIN | B | Wet | 16 | 1.03195693 | 1.171147 | 0.268307 | 4.95130547 | 0.68672396 | 0.98172449 | 0.69950782 | 0.09376424 | 2 |
| 2021-08-06-08-24-ADMIN | B | Wet | 08 | 1.0338576  | 0.731    | 0.172483 | 6.0289433  | 0.68488318 | 0.97637357 | 0.70145609 | 0.03426285 | 3 |
| 2021-08-06-13-18-ADMIN | B | Wet | 13 | 1.04752148 | 0.347578 | 0.121369 | 6.46615913 | 0.5998805  | 0.95736873 | 0.62659296 | 0.00689443 | 0 |

|                        |   |     |    |            |          |          |            |            |            |            |            |   |
|------------------------|---|-----|----|------------|----------|----------|------------|------------|------------|------------|------------|---|
| 2021-08-07-17-24-ADMIN | B | Wet | 17 | 1.02580002 | 0.547831 | 0.141371 | 4.98313469 | 0.69626042 | 0.98381665 | 0.7077136  | 0.10184057 | 2 |
| 2021-08-09-06-06-ADMIN | B | Wet | 06 | 1.02758745 | 1.890285 | 0.507781 | 3.74583823 | 0.76939318 | 0.99034238 | 0.77689615 | 0.05988304 | 4 |
| 2021-08-10-16-18-ADMIN | B | Wet | 16 | 1.02910787 | 1.255745 | 0.273568 | 7.77304591 | 0.72824522 | 0.98764916 | 0.73735214 | 0.27239151 | 2 |
| 2021-08-12-08-18-ADMIN | B | Wet | 08 | 1.02692332 | 0.666632 | 0.158441 | 2.96621759 | 0.71586312 | 0.98892836 | 0.72387764 | 0.21392428 | 2 |
| 2021-08-12-09-18-ADMIN | B | Wet | 09 | 1.02782251 | 0.870975 | 0.188777 | 3.15002707 | 0.70555364 | 0.9867843  | 0.7150029  | 0.12594645 | 3 |
| 2021-08-15-08-48-ADMIN | B | Wet | 08 | 1.03229898 | 0.496126 | 0.136227 | 2.79145643 | 0.7516118  | 0.98562147 | 0.76257653 | 0.00560172 | 5 |
| 2021-08-16-10-30-ADMIN | B | Wet | 10 | 1.032817   | 0.720733 | 0.168911 | 2.62032649 | 0.6863588  | 0.98975623 | 0.69346247 | 0.4473992  | 5 |
| 2021-08-17-08-48-ADMIN | B | Wet | 08 | 1.02872837 | 1.460575 | 0.332124 | 8.20080279 | 0.72664911 | 0.98394471 | 0.73850604 | 0.12520776 | 1 |
| 2021-08-17-14-30-ADMIN | B | Wet | 14 | 1.02505102 | 0.927579 | 0.198583 | 2.90682137 | 0.69905932 | 0.99007178 | 0.70606933 | 0.47134503 | 2 |
| 2021-08-19-16-42-ADMIN | B | Wet | 16 | 1.03097559 | 1.033154 | 0.215634 | 3.08233728 | 0.7261261  | 0.98874396 | 0.73439245 | 0.10074485 | 1 |
| 2021-08-21-11-36-ADMIN | B | Wet | 11 | 1.03910383 | 0.414393 | 0.12864  | 1.69108837 | 0.6599872  | 0.98456115 | 0.67033642 | 0.09169591 | 3 |
| 2021-08-21-17-48-ADMIN | B | Wet | 17 | 1.03077395 | 0.950171 | 0.201923 | 3.29980718 | 0.68002344 | 0.99041786 | 0.68660257 | 0.63944598 | 1 |
| 2021-08-21-18-00-ADMIN | B | Wet | 18 | 1.03067839 | 1.352384 | 0.29526  | 5.87986938 | 0.7069881  | 0.9860322  | 0.71700306 | 0.193241   | 2 |
| 2021-08-22-07-24-ADMIN | B | Wet | 07 | 1.02902162 | 0.644227 | 0.154932 | 2.40964304 | 0.73556142 | 0.98876313 | 0.74392076 | 0.07953216 | 4 |
| 2021-08-22-15-00-ADMIN | B | Wet | 15 | 1.02292669 | 1.183491 | 0.267877 | 7.45500286 | 0.77479766 | 0.98802609 | 0.78418745 | 0.13540166 | 1 |
| 2021-08-23-05-18-ADMIN | B | Wet | 05 | 1.030054   | 0.487597 | 0.134573 | 3.90669006 | 0.69156624 | 0.97688919 | 0.70792701 | 0.01728532 | 1 |
| 2021-08-24-07-12-ADMIN | B | Wet | 07 | 1.02677245 | 0.454835 | 0.131463 | 3.8460909  | 0.68937176 | 0.98370065 | 0.70079425 | 0.06530009 | 4 |
| 2021-08-24-14-30-ADMIN | B | Wet | 14 | 1.05096643 | 0.731624 | 0.168642 | 8.91406626 | 0.67779711 | 0.98379102 | 0.68896452 | 0.12254848 | 3 |
| 2021-08-25-09-54-ADMIN | B | Wet | 09 | 1.03280368 | 0.745912 | 0.167462 | 4.11207798 | 0.69282972 | 0.98773073 | 0.70143583 | 0.23322869 | 2 |
| 2021-08-26-13-00-ADMIN | B | Wet | 13 | 1.03640144 | 0.678081 | 0.163894 | 1.9350125  | 0.65996589 | 0.99043446 | 0.66633979 | 0.7188181  | 4 |
| 2021-08-28-10-06-ADMIN | B | Wet | 10 | 1.03175244 | 1.056222 | 0.221057 | 3.9343623  | 0.71019119 | 0.98749677 | 0.7191833  | 0.19338874 | 1 |
| 2021-08-28-15-06-ADMIN | B | Wet | 15 | 1.02421616 | 1.415997 | 0.313423 | 6.37249594 | 0.73034657 | 0.99001704 | 0.73771111 | 0.58578024 | 1 |
| 2021-08-29-09-42-ADMIN | B | Wet | 09 | 1.03017977 | 0.671481 | 0.160338 | 1.96098568 | 0.72709639 | 0.98842104 | 0.73561404 | 0.06145891 | 4 |
| 2021-08-29-10-30-ADMIN | B | Wet | 10 | 1.03763541 | 0.592291 | 0.148251 | 2.85438442 | 0.6890412  | 0.98700295 | 0.69811464 | 0.14504155 | 3 |
| 2021-08-31-18-42-ADMIN | B | Wet | 18 | 1.03164529 | 0.858891 | 0.186414 | 3.43388653 | 0.68227563 | 0.98901072 | 0.68985666 | 0.38526316 | 0 |
| 2021-09-02-06-00-ADMIN | B | Wet | 06 | 1.0368809  | 1.300301 | 0.284786 | 3.19735274 | 0.72737058 | 0.98723491 | 0.73677559 | 0.06718375 | 2 |
| 2021-09-03-05-00-ADMIN | B | Wet | 05 | 1.03227436 | 0.493536 | 0.136631 | 2.45310076 | 0.73609587 | 0.98367914 | 0.74830891 | 0.00748538 | 0 |
| 2021-09-03-07-06-ADMIN | B | Wet | 07 | 1.03103297 | 0.747048 | 0.169149 | 2.86120819 | 0.69768783 | 0.98258526 | 0.71005323 | 0.03693444 | 4 |

|                        |   |     |    |            |          |          |            |            |            |            |            |   |
|------------------------|---|-----|----|------------|----------|----------|------------|------------|------------|------------|------------|---|
| 2021-09-03-12-24-ADMIN | B | Wet | 12 | 1.03233258 | 0.868539 | 0.189369 | 2.66186253 | 0.69769742 | 0.98836288 | 0.7059122  | 0.2137273  | 2 |
| 2021-09-04-09-54-ADMIN | B | Wet | 09 | 1.03146125 | 0.556096 | 0.145527 | 2.04941808 | 0.68312118 | 0.98881642 | 0.69084733 | 0.34060942 | 1 |
| 2021-09-04-13-06-ADMIN | B | Wet | 13 | 1.03440246 | 0.284105 | 0.116226 | 2.68613626 | 0.67436803 | 0.98559622 | 0.68422343 | 0.12606956 | 2 |
| 2021-09-05-06-18-ADMIN | B | Wet | 06 | 1.02975474 | 1.078234 | 0.230619 | 3.28514714 | 0.74036453 | 0.987256   | 0.74992153 | 0.03058172 | 4 |
| 2021-09-05-13-00-ADMIN | B | Wet | 13 | 1.03160011 | 0.782765 | 0.177363 | 1.49321399 | 0.74261607 | 0.98905568 | 0.75083343 | 0.03024931 | 1 |
| 2021-09-05-14-00-ADMIN | B | Wet | 14 | 1.02089642 | 2.118761 | 0.663317 | 8.69191663 | 0.77279376 | 0.986393   | 0.78345422 | 0.16960296 | 1 |
| 2021-09-06-12-36-ADMIN | B | Wet | 12 | 1.0376025  | 0.579642 | 0.14518  | 3.70781653 | 0.66528961 | 0.98606257 | 0.6746931  | 0.18334257 | 2 |
| 2021-09-06-13-36-ADMIN | B | Wet | 13 | 1.02623841 | 1.430922 | 0.3256   | 7.55238135 | 0.75942191 | 0.98617986 | 0.77006431 | 0.11449677 | 1 |
| 2021-09-07-14-00-ADMIN | B | Wet | 14 | 1.02630435 | 1.15372  | 0.248167 | 2.76536588 | 0.69257855 | 0.99014843 | 0.69946943 | 0.49355494 | 3 |
| 2021-09-07-15-06-ADMIN | B | Wet | 15 | 1.05311208 | 0.391921 | 0.12518  | 3.41565636 | 0.60993998 | 0.96865509 | 0.62967716 | 0.01663281 | 2 |
| 2021-09-08-07-42-ADMIN | B | Wet | 07 | 1.02623879 | 1.887019 | 0.524801 | 6.69951695 | 0.77322008 | 0.99100356 | 0.78023946 | 0.52097261 | 0 |
| 2021-09-08-11-54-ADMIN | B | Wet | 11 | 1.02346341 | 1.720195 | 0.450541 | 6.83729368 | 0.7627291  | 0.99093968 | 0.76970285 | 0.64923361 | 2 |
| 2021-09-09-15-12-ADMIN | B | Wet | 15 | 1.06318603 | 0.890783 | 0.19261  | 5.6969391  | 0.70529762 | 0.98728475 | 0.71438115 | 0.35561711 | 1 |
| 2021-09-09-15-36-ADMIN | B | Wet | 15 | 1.02163021 | 1.205663 | 0.26871  | 7.69486    | 0.7244631  | 0.98870125 | 0.73274217 | 0.50581718 | 1 |
| 2021-09-10-05-30-ADMIN | B | Wet | 05 | 1.03316948 | 1.013245 | 0.21622  | 4.92577667 | 0.72475673 | 0.98823132 | 0.73338774 | 0.1724346  | 2 |
| 2021-09-10-07-00-ADMIN | B | Wet | 07 | 1.03004978 | 0.929458 | 0.203771 | 3.97743592 | 0.73124973 | 0.9903325  | 0.7383881  | 0.23859649 | 3 |
| 2021-09-10-09-42-ADMIN | B | Wet | 09 | 1.02789432 | 0.464818 | 0.134685 | 3.52324684 | 0.66685306 | 0.98625919 | 0.67614382 | 0.22086796 | 4 |
| 2021-09-11-06-06-ADMIN | B | Wet | 06 | 1.03597035 | 1.163271 | 0.248617 | 5.41416733 | 0.71513162 | 0.99017129 | 0.72223021 | 0.45296399 | 2 |
| 2021-09-11-08-12-ADMIN | B | Wet | 08 | 1.03208121 | 0.895625 | 0.194787 | 3.14477056 | 0.67700877 | 0.99098365 | 0.68316845 | 0.70031394 | 4 |
| 2021-11-27-15-42-ADMIN | B | Dry | 15 | 1.0302217  | 0.59647  | 0.150167 | 2.50236765 | 0.69505417 | 0.98768201 | 0.70372262 | 0.18770083 | 2 |
| 2021-11-29-14-24-ADMIN | B | Dry | 14 | 1.00496266 | 2.205131 | 0.751178 | 6.09189565 | 0.85459475 | 0.99004947 | 0.86318389 | 0.68144044 | 1 |
| 2021-11-29-15-00-ADMIN | B | Dry | 15 | 1.02775506 | 0.713425 | 0.164638 | 2.46460947 | 0.69602109 | 0.98875657 | 0.70393575 | 0.35370883 | 3 |
| 2021-12-01-18-24-ADMIN | B | Dry | 18 | 1.03060283 | 1.1428   | 0.245552 | 2.30903412 | 0.72572075 | 0.99065105 | 0.7325695  | 0.20609418 | 0 |
| 2021-12-03-17-18-ADMIN | B | Dry | 17 | 1.0343281  | 0.694638 | 0.162841 | 2.93716712 | 0.69816442 | 0.98860245 | 0.70621352 | 0.27492767 | 2 |
| 2021-12-04-08-00-ADMIN | B | Dry | 08 | 1.02683816 | 1.045255 | 0.223992 | 3.16175229 | 0.71912629 | 0.98598236 | 0.72935006 | 0.07842413 | 1 |
| 2021-12-05-05-36-ADMIN | B | Dry | 05 | 1.03219162 | 0.773761 | 0.17212  | 2.05260666 | 0.7163713  | 0.98539143 | 0.72699162 | 0.03102493 | 0 |
| 2021-12-05-08-12-ADMIN | B | Dry | 08 | 1.0249383  | 0.723051 | 0.166117 | 2.00280646 | 0.74282669 | 0.98805979 | 0.75180338 | 0.05457679 | 3 |
| 2021-12-07-12-06-ADMIN | B | Dry | 12 | 1.02833201 | 0.962085 | 0.205635 | 3.39815487 | 0.67627765 | 0.98879794 | 0.68393918 | 0.45316097 | 2 |

|                        |   |     |    |            |          |          |            |            |            |            |            |   |
|------------------------|---|-----|----|------------|----------|----------|------------|------------|------------|------------|------------|---|
| 2021-12-09-16-36-ADMIN | B | Dry | 16 | 1.02497145 | 0.852646 | 0.1859   | 4.47045243 | 0.70886983 | 0.98752697 | 0.71782326 | 0.29346876 | 1 |
| 2021-12-12-16-18-ADMIN | B | Dry | 16 | 1.02631027 | 0.666533 | 0.162643 | 1.93139208 | 0.75524525 | 0.98955839 | 0.76321443 | 0.03235457 | 1 |
| 2021-12-13-07-18-ADMIN | B | Dry | 07 | 1.02419405 | 1.007047 | 0.213005 | 3.34897127 | 0.7375587  | 0.98903096 | 0.74573874 | 0.17174515 | 2 |
| 2021-12-13-13-42-ADMIN | B | Dry | 13 | 1.0262757  | 0.883035 | 0.192313 | 4.74978341 | 0.71305945 | 0.98690677 | 0.72251957 | 0.1934626  | 1 |
| 2021-12-29-06-54-ADMIN | B | Dry | 06 | 1.02478392 | 0.928411 | 0.199097 | 2.93854979 | 0.7507059  | 0.98942145 | 0.75873218 | 0.08491228 | 4 |
| 2021-12-30-05-18-ADMIN | B | Dry | 05 | 1.03548124 | 1.381406 | 0.305319 | 1.76422391 | 0.78700088 | 0.98884157 | 0.79588167 | 0.00215451 | 0 |
| 2021-12-30-13-00-ADMIN | B | Dry | 13 | 1.03208443 | 0.620467 | 0.152666 | 1.83531406 | 0.7243484  | 0.98843323 | 0.73282482 | 0.08891351 | 2 |
| 2021-12-30-15-54-ADMIN | B | Dry | 15 | 1.02566869 | 0.647195 | 0.156771 | 2.21814528 | 0.73315019 | 0.99032396 | 0.74031349 | 0.20013543 | 1 |
| 2021-12-31-16-48-ADMIN | B | Dry | 16 | 1.02871943 | 0.857069 | 0.192281 | 2.4969139  | 0.68461793 | 0.98880736 | 0.69236735 | 0.3833795  | 3 |
| 2022-01-03-07-30-ADMIN | B | Dry | 07 | 1.0201835  | 1.700434 | 0.420083 | 2.38982398 | 0.75560478 | 0.98997085 | 0.76325963 | 0.12811327 | 4 |
| 2022-01-03-11-06-ADMIN | B | Dry | 11 | 1.02221276 | 0.961421 | 0.206782 | 2.20431427 | 0.73910871 | 0.98960965 | 0.74686894 | 0.17451524 | 2 |
| 2022-01-03-16-24-ADMIN | B | Dry | 16 | 1.02434897 | 0.950516 | 0.207998 | 2.15757022 | 0.73032547 | 0.98801147 | 0.73918724 | 0.12409972 | 2 |
| 2022-01-05-08-12-ADMIN | B | Dry | 08 | 1.030777   | 0.493556 | 0.136386 | 2.16307915 | 0.72653657 | 0.98487943 | 0.73769088 | 0.03385657 | 5 |
| 2022-01-06-09-18-ADMIN | B | Dry | 09 | 1.02135857 | 1.423318 | 0.314268 | 3.37664938 | 0.72736685 | 0.98985453 | 0.73482196 | 0.3501385  | 3 |
| 2022-01-06-14-36-ADMIN | B | Dry | 14 | 1.02715547 | 0.948193 | 0.205685 | 1.89478737 | 0.73226296 | 0.99039538 | 0.73936427 | 0.23277316 | 3 |
| 2022-01-09-11-54-ADMIN | B | Dry | 11 | 1.03242677 | 0.781422 | 0.176275 | 1.86263688 | 0.73851809 | 0.98979559 | 0.74613192 | 0.11187442 | 2 |
| 2022-01-10-05-00-ADMIN | B | Dry | 05 | 1.02849047 | 0.525281 | 0.141761 | 1.8825695  | 0.73771975 | 0.98786507 | 0.74678189 | 0.0301385  | 0 |
| 2022-01-11-06-42-ADMIN | B | Dry | 06 | 1.01909748 | 1.413657 | 0.33906  | 3.33237096 | 0.80332096 | 0.98799745 | 0.81308    | 0.01711296 | 4 |
| 2022-01-12-11-36-ADMIN | B | Dry | 11 | 1.02412193 | 0.552166 | 0.142716 | 1.83438593 | 0.72599927 | 0.98752913 | 0.73516745 | 0.08110803 | 2 |
| 2022-01-14-05-36-ADMIN | B | Dry | 05 | 1.0325641  | 1.158061 | 0.244529 | 1.70098242 | 0.75674704 | 0.98931537 | 0.76491992 | 0.01969837 | 0 |
| 2022-01-15-05-00-ADMIN | B | Dry | 05 | 1.03710836 | 0.457934 | 0.132927 | 1.37893018 | 0.7563992  | 0.9879625  | 0.7656153  | 0.00509695 | 0 |
| 2022-01-18-17-18-ADMIN | B | Dry | 17 | 1.0251631  | 0.87505  | 0.192983 | 2.29351924 | 0.73087791 | 0.98771417 | 0.73996904 | 0.08286858 | 1 |
| 2022-01-19-06-30-ADMIN | B | Dry | 06 | 1.03342991 | 0.847059 | 0.184135 | 2.18497863 | 0.74702424 | 0.98833946 | 0.75583772 | 0.02654355 | 3 |
| 2022-01-20-18-00-ADMIN | B | Dry | 18 | 1.03325637 | 0.725354 | 0.167064 | 1.72830148 | 0.73233943 | 0.9898809  | 0.73982581 | 0.10887042 | 0 |
| 2022-01-22-08-24-ADMIN | B | Dry | 08 | 1.02599315 | 0.939456 | 0.200585 | 2.43808037 | 0.74528342 | 0.98991213 | 0.75287835 | 0.11819021 | 3 |
| 2022-01-23-06-12-ADMIN | B | Dry | 06 | 1.03134902 | 1.240989 | 0.263252 | 2.28190368 | 0.72088416 | 0.9893497  | 0.72864445 | 0.17408433 | 1 |
| 2022-01-26-14-36-ADMIN | B | Dry | 14 | 1.02870219 | 0.649274 | 0.160025 | 2.20171241 | 0.69988689 | 0.99015401 | 0.7068465  | 0.43571561 | 1 |
| 2022-01-26-15-36-ADMIN | B | Dry | 15 | 1.01899851 | 1.475345 | 0.339749 | 6.43160045 | 0.76396795 | 0.98935569 | 0.77218736 | 0.39237919 | 0 |

|                        |   |     |    |            |          |          |            |            |            |            |            |   |
|------------------------|---|-----|----|------------|----------|----------|------------|------------|------------|------------|------------|---|
| 2022-01-27-12-00-ADMIN | B | Dry | 12 | 1.02777207 | 0.590345 | 0.152334 | 2.84600515 | 0.67540926 | 0.98804005 | 0.6835849  | 0.38635888 | 2 |
| 2022-01-28-11-12-ADMIN | B | Dry | 11 | 1.02916961 | 0.880281 | 0.195047 | 2.53727763 | 0.67071226 | 0.9906761  | 0.67702477 | 0.78694983 | 2 |
| 2022-01-30-06-06-ADMIN | B | Dry | 06 | 1.02973269 | 1.670944 | 0.399874 | 2.84526911 | 0.74956138 | 0.99090774 | 0.75643912 | 0.0908618  | 2 |
| 2020-12-18-12-24-CSLIB | C | Dry | 12 | 1.04032626 | 0.284508 | 0.12261  | 9.90414426 | 0.51058011 | 0.97654247 | 0.52284476 | 0.18885811 | 3 |
| 2020-12-19-15-06-CSLIB | C | Dry | 15 | 1.00862776 | 0.609107 | 0.16581  | 10.0146191 | 0.547385   | 0.98447608 | 0.55601656 | 0.47679902 | 1 |
| 2020-12-20-15-06-CSLIB | C | Dry | 15 | 1.06037629 | 0.014878 | 0.10047  | 10.6517676 | 0.38497826 | 0.95764691 | 0.40200438 | 0.05207756 | 3 |
| 2020-12-20-17-42-CSLIB | C | Dry | 17 | 1.02234097 | 0.112763 | 0.106486 | 8.73981725 | 0.42280456 | 0.98539298 | 0.42907203 | 0.55578947 | 1 |
| 2020-12-22-12-48-CSLIB | C | Dry | 12 | 1.07629623 | 0.072344 | 0.104025 | 8.50367514 | 0.35312636 | 0.97847531 | 0.36089451 | 0.25927978 | 3 |
| 2020-12-22-14-00-CSLIB | C | Dry | 14 | 1.02145415 | 0.184408 | 0.10897  | 8.20471891 | 0.38338731 | 0.98385598 | 0.38967829 | 0.43951985 | 1 |
| 2020-12-23-11-12-CSLIB | C | Dry | 11 | 1.03792744 | 0.290788 | 0.131203 | 20.3396441 | 0.42058435 | 0.979386   | 0.42943676 | 0.29328409 | 3 |
| 2020-12-23-12-24-CSLIB | C | Dry | 12 | 1.049024   | 0.042151 | 0.101803 | 11.9317414 | 0.38630896 | 0.97572211 | 0.39592109 | 0.18009234 | 4 |
| 2020-12-27-05-18-CSLIB | C | Dry | 05 | 0.99663219 | 0.152195 | 0.110639 | 8.20174553 | 0.5194062  | 0.98230938 | 0.52876029 | 0.08204371 | 1 |
| 2020-12-27-09-18-CSLIB | C | Dry | 09 | 1.00539145 | 1.997574 | 0.587358 | 7.25295549 | 0.81208031 | 0.98467811 | 0.82471653 | 0.54976916 | 3 |
| 2020-12-27-15-06-CSLIB | C | Dry | 15 | 1.01416347 | 1.00128  | 0.242803 | 9.14896425 | 0.5119392  | 0.98754864 | 0.51839391 | 0.33868883 | 3 |
| 2020-12-27-16-06-CSLIB | C | Dry | 16 | 1.01207347 | 0.397409 | 0.140044 | 9.05087252 | 0.50804327 | 0.98068245 | 0.51805074 | 0.13185596 | 4 |
| 2020-12-30-05-48-CSLIB | C | Dry | 05 | 1.03605448 | 0.711279 | 0.166034 | 14.5878114 | 0.53285562 | 0.98345586 | 0.54181956 | 0.1767313  | 1 |
| 2021-01-04-18-00-CSLIB | C | Dry | 18 | 0.9714184  | 0.16126  | 0.110425 | 9.86079458 | 0.46639639 | 0.98243766 | 0.47473382 | 0.26674054 | 1 |
| 2021-01-07-06-54-CSLIB | C | Dry | 06 | 1.08389119 | 0.919044 | 0.214478 | 15.4941573 | 0.54693928 | 0.98260158 | 0.55662365 | 0.42307171 | 5 |
| 2021-01-13-05-42-CSLIB | C | Dry | 05 | 1.00497661 | 0.109914 | 0.104664 | 8.50612644 | 0.48532219 | 0.98208708 | 0.49417429 | 0.14697445 | 1 |
| 2021-01-14-16-48-CSLIB | C | Dry | 16 | 1.00019938 | 0.215508 | 0.111018 | 11.2735488 | 0.44746889 | 0.9797682  | 0.45670894 | 0.22049862 | 3 |
| 2021-01-16-06-54-CSLIB | C | Dry | 06 | 1.08960391 | 0.953984 | 0.226643 | 14.3796577 | 0.57283664 | 0.98258488 | 0.58298947 | 0.21698984 | 6 |
| 2021-01-18-15-30-CSLIB | C | Dry | 15 | 0.99826357 | 0.276956 | 0.11653  | 8.75126242 | 0.4787349  | 0.98830488 | 0.48440002 | 0.37016928 | 2 |
| 2021-01-20-14-54-CSLIB | C | Dry | 14 | 0.97580605 | 0.072282 | 0.103013 | 7.79328321 | 0.37401789 | 0.9827457  | 0.38058461 | 0.2714189  | 2 |
| 2021-01-26-13-30-CSLIB | C | Dry | 13 | 1.03498764 | 0.153762 | 0.107322 | 10.4385399 | 0.41779731 | 0.98632144 | 0.42359143 | 0.69978455 | 6 |
| 2021-01-26-14-36-CSLIB | C | Dry | 14 | 1.01530318 | 0.619609 | 0.181276 | 10.2452062 | 0.45170195 | 0.98465378 | 0.4587419  | 0.48007387 | 4 |
| 2021-01-28-09-18-CSLIB | C | Dry | 09 | 1.05891986 | 1.306195 | 0.323504 | 15.4241562 | 0.66776046 | 0.98158208 | 0.68028998 | 0.15364728 | 5 |
| 2021-01-28-14-30-CSLIB | C | Dry | 14 | 0.97467691 | 0.073513 | 0.103012 | 4.07655346 | 0.48512833 | 0.972096   | 0.49905393 | 0.10944906 | 2 |
| 2021-01-30-07-00-CSLIB | C | Dry | 07 | 1.01065345 | 0.792789 | 0.199044 | 6.56695588 | 0.52562799 | 0.98107888 | 0.53576527 | 0.18890736 | 7 |

|                        |   |     |    |            |          |          |            |            |            |            |            |   |
|------------------------|---|-----|----|------------|----------|----------|------------|------------|------------|------------|------------|---|
| 2021-01-31-07-42-CSLIB | C | Dry | 07 | 0.99275278 | 0.778165 | 0.185309 | 15.0976091 | 0.53007074 | 0.98460561 | 0.53835843 | 0.14108957 | 4 |
| 2021-02-01-12-12-CSLIB | C | Dry | 12 | 1.02847827 | 0.062858 | 0.102303 | 6.52964359 | 0.40951833 | 0.98118267 | 0.41737216 | 0.27368421 | 4 |
| 2021-02-02-08-54-CSLIB | C | Dry | 08 | 1.01722607 | 0.462828 | 0.139461 | 10.9675848 | 0.49495011 | 0.98302183 | 0.5034986  | 0.35601108 | 7 |
| 2021-02-02-13-30-CSLIB | C | Dry | 13 | 0.99145288 | 0.221411 | 0.111776 | 9.05396228 | 0.43569497 | 0.98398215 | 0.44278747 | 0.40467836 | 3 |
| 2021-02-03-08-18-CSLIB | C | Dry | 08 | 1.11871776 | 1.095247 | 0.252804 | 11.4315801 | 0.61973824 | 0.98272382 | 0.63063317 | 0.19458295 | 5 |
| 2021-02-03-10-00-CSLIB | C | Dry | 10 | 1.05686918 | 0.52745  | 0.149529 | 14.7391699 | 0.52178814 | 0.9687288  | 0.53863181 | 0.06955987 | 3 |
| 2021-02-05-05-18-CSLIB | C | Dry | 05 | 0.99455915 | 0.02581  | 0.100958 | 10.9293586 | 0.44393858 | 0.98342534 | 0.45142073 | 0.15157895 | 0 |
| 2021-02-05-17-54-CSLIB | C | Dry | 17 | 0.97609332 | 0.250393 | 0.1137   | 9.83507261 | 0.43516914 | 0.98692169 | 0.44093583 | 0.36195753 | 1 |
| 2021-02-06-14-00-CSLIB | C | Dry | 14 | 0.98858495 | 0.109381 | 0.105103 | 12.7100077 | 0.41409452 | 0.9829802  | 0.42126436 | 0.34578024 | 3 |
| 2021-02-06-15-54-CSLIB | C | Dry | 15 | 1.0078648  | 0.073816 | 0.103906 | 14.1897501 | 0.41355681 | 0.97908159 | 0.42239259 | 0.23165282 | 2 |
| 2021-02-07-12-00-CSLIB | C | Dry | 12 | 1.06131512 | 0.031738 | 0.101058 | 11.7337984 | 0.37951979 | 0.9373892  | 0.40486896 | 0.01827024 | 6 |
| 2021-02-10-10-42-CSLIB | C | Dry | 10 | 1.00084988 | 0.278103 | 0.119864 | 8.13067927 | 0.44546544 | 0.98156819 | 0.45383035 | 0.31791936 | 5 |
| 2021-02-10-17-06-CSLIB | C | Dry | 17 | 1.02677116 | 0.075467 | 0.103109 | 9.67605064 | 0.41391251 | 0.98473535 | 0.42032868 | 0.39533395 | 2 |
| 2021-02-12-14-00-CSLIB | C | Dry | 14 | 1.01353566 | 0.040312 | 0.101842 | 10.474462  | 0.38529195 | 0.98426411 | 0.39145179 | 0.12631579 | 2 |
| 2021-02-13-07-06-CSLIB | C | Dry | 07 | 1.01755339 | 0.404947 | 0.136535 | 14.6294459 | 0.45796839 | 0.98608399 | 0.46443142 | 0.23093875 | 3 |
| 2021-02-13-14-36-CSLIB | C | Dry | 14 | 0.98120725 | 0.10763  | 0.104539 | 7.18546006 | 0.38074654 | 0.98413809 | 0.38688325 | 0.45460142 | 3 |
| 2021-02-14-10-54-CSLIB | C | Dry | 10 | 0.96520064 | 0.115357 | 0.106744 | 10.2505946 | 0.40260885 | 0.98216209 | 0.40992098 | 0.05830717 | 5 |
| 2021-02-16-13-06-CSLIB | C | Dry | 13 | 1.01253584 | 0.05591  | 0.102095 | 9.69529202 | 0.38529878 | 0.97794293 | 0.39398902 | 0.21514312 | 3 |
| 2021-02-18-11-54-CSLIB | C | Dry | 11 | 0.9923724  | 0.168802 | 0.110367 | 6.81365509 | 0.42707093 | 0.9829963  | 0.43445833 | 0.34245614 | 3 |
| 2021-02-20-09-30-CSLIB | C | Dry | 09 | 1.01018012 | 0.19535  | 0.11103  | 13.2628499 | 0.42951369 | 0.98249199 | 0.43716763 | 0.20022161 | 7 |
| 2021-02-21-06-30-CSLIB | C | Dry | 06 | 0.99803725 | 0.518321 | 0.154902 | 8.20827337 | 0.49824846 | 0.98761179 | 0.50449829 | 0.08742382 | 5 |
| 2021-02-22-05-06-CSLIB | C | Dry | 05 | 1.00669637 | 0.723314 | 0.167312 | 6.25122415 | 0.51901227 | 0.98608379 | 0.52633689 | 0.22714681 | 3 |
| 2021-02-23-05-42-CSLIB | C | Dry | 05 | 0.99470573 | 0.561567 | 0.15644  | 10.9411753 | 0.54227283 | 0.98726772 | 0.54926624 | 0.30836565 | 6 |
| 2021-02-23-13-42-CSLIB | C | Dry | 13 | 1.02246521 | 0.135328 | 0.109298 | 11.6113339 | 0.42753655 | 0.97768574 | 0.43729446 | 0.22869806 | 4 |
| 2021-02-25-10-54-CSLIB | C | Dry | 10 | 0.96779811 | 0.12792  | 0.1064   | 10.1873072 | 0.39587484 | 0.97818406 | 0.40470384 | 0.19623269 | 4 |
| 2021-02-25-18-42-CSLIB | C | Dry | 18 | 1.00419819 | 0.612583 | 0.149616 | 9.99282801 | 0.54557968 | 0.98702329 | 0.55275259 | 0.35417667 | 1 |
| 2021-03-01-06-36-CSLIB | C | Dry | 06 | 1.02434761 | 0.652738 | 0.157806 | 8.9662943  | 0.54874845 | 0.98618046 | 0.55643817 | 0.31157895 | 5 |
| 2021-03-01-10-12-CSLIB | C | Dry | 10 | 1.00136381 | 0.456093 | 0.137929 | 9.40870187 | 0.47316074 | 0.98649969 | 0.47963597 | 0.38479532 | 6 |

|                        |   |     |    |            |          |          |            |            |            |            |            |   |
|------------------------|---|-----|----|------------|----------|----------|------------|------------|------------|------------|------------|---|
| 2021-03-02-09-48-CSLIB | C | Dry | 09 | 1.00726349 | 0.154456 | 0.108591 | 13.3887688 | 0.46677974 | 0.97940755 | 0.47659397 | 0.08558941 | 3 |
| 2021-03-02-10-00-CSLIB | C | Dry | 10 | 1.02657448 | 0.229375 | 0.114959 | 14.7616756 | 0.46650319 | 0.97510888 | 0.47841139 | 0.1047707  | 2 |
| 2021-03-03-06-42-CSLIB | C | Dry | 06 | 0.99625784 | 0.973044 | 0.215258 | 9.26558853 | 0.57391394 | 0.98813918 | 0.58080274 | 0.30118806 | 5 |
| 2021-03-03-07-00-CSLIB | C | Dry | 07 | 1.01433565 | 0.37375  | 0.127043 | 12.1858734 | 0.51824129 | 0.98599661 | 0.52560149 | 0.24434595 | 5 |
| 2021-03-03-08-36-CSLIB | C | Dry | 08 | 1.04458472 | 0.661578 | 0.17316  | 12.5378222 | 0.54292555 | 0.98060826 | 0.55366202 | 0.08834718 | 4 |
| 2021-03-03-13-36-CSLIB | C | Dry | 13 | 1.05531991 | 0.368938 | 0.135784 | 5.85871117 | 0.44146202 | 0.91930561 | 0.48021247 | 0.01030471 | 3 |
| 2021-03-03-15-48-CSLIB | C | Dry | 15 | 1.03113307 | 0.225996 | 0.112506 | 13.047034  | 0.42000087 | 0.97491232 | 0.43080887 | 0.13961219 | 5 |
| 2021-03-03-17-30-CSLIB | C | Dry | 17 | 1.0356964  | 0.401745 | 0.125977 | 11.8508509 | 0.48918138 | 0.95584437 | 0.51177932 | 0.04097261 | 1 |
| 2021-03-05-18-48-CSLIB | C | Dry | 18 | 1.02101206 | 0.035799 | 0.101184 | 8.59447953 | 0.44763876 | 0.9844082  | 0.4547288  | 0.35597415 | 1 |
| 2021-03-06-09-06-CSLIB | C | Dry | 09 | 1.00050604 | 0.561346 | 0.145483 | 12.1526559 | 0.50316903 | 0.98744073 | 0.50956884 | 0.22406894 | 6 |
| 2021-03-07-14-36-CSLIB | C | Dry | 14 | 1.08545035 | 0.008684 | 0.100223 | 8.03820876 | 0.37112534 | 0.95377856 | 0.38911059 | 0.02573099 | 2 |
| 2021-03-07-16-48-CSLIB | C | Dry | 16 | 1.07872635 | 0.033799 | 0.101459 | 9.99396006 | 0.39906103 | 0.97703238 | 0.40844197 | 0.1384426  | 6 |
| 2021-03-11-12-00-CSLIB | C | Dry | 12 | 1.03252066 | 0.437604 | 0.139707 | 9.10146187 | 0.45522116 | 0.97441578 | 0.46717343 | 0.10095414 | 6 |
| 2021-03-11-13-24-CSLIB | C | Dry | 13 | 1.0640518  | 0.046035 | 0.101916 | 7.87102598 | 0.36660542 | 0.93405066 | 0.39248987 | 0.01300092 | 2 |
| 2021-03-12-17-00-CSLIB | C | Dry | 17 | 1.00801841 | 0.27842  | 0.121363 | 10.8771317 | 0.43436265 | 0.9804325  | 0.44303167 | 0.19787011 | 4 |
| 2021-03-14-13-00-CSLIB | C | Dry | 13 | 0.99168288 | 0.300165 | 0.124611 | 11.4435432 | 0.42012598 | 0.98075308 | 0.4283708  | 0.10440135 | 5 |
| 2021-03-14-14-06-CSLIB | C | Dry | 14 | 1.04384888 | 0.035844 | 0.101739 | 11.0627687 | 0.41314296 | 0.96899933 | 0.42636042 | 0.03257618 | 3 |
| 2021-03-16-14-24-CSLIB | C | Dry | 14 | 1.00741581 | 0.29241  | 0.116725 | 10.2213924 | 0.44010443 | 0.98508748 | 0.44676685 | 0.43769775 | 6 |
| 2021-03-18-12-24-CSLIB | C | Dry | 12 | 1.02691195 | 0.124197 | 0.107768 | 11.8724391 | 0.3758466  | 0.98280772 | 0.3824213  | 0.34073253 | 4 |
| 2021-03-20-06-54-CSLIB | C | Dry | 06 | 1.00444123 | 0.40858  | 0.129518 | 10.8162887 | 0.46648986 | 0.98705349 | 0.47260849 | 0.05518006 | 6 |
| 2021-03-20-13-30-CSLIB | C | Dry | 13 | 0.96955929 | 0.138977 | 0.1106   | 10.2129503 | 0.36579488 | 0.98406255 | 0.37171913 | 0.1820868  | 7 |
| 2021-03-22-08-42-CSLIB | C | Dry | 08 | 0.99431327 | 0.342074 | 0.130206 | 7.5384119  | 0.4677506  | 0.98698394 | 0.47391916 | 0.06994152 | 6 |
| 2021-03-22-11-00-CSLIB | C | Dry | 11 | 0.99555025 | 0.305117 | 0.122658 | 15.3521398 | 0.45368514 | 0.97814262 | 0.4638231  | 0.22081871 | 3 |
| 2021-03-22-14-24-CSLIB | C | Dry | 14 | 1.04368917 | 0.375543 | 0.131427 | 5.98568609 | 0.38798328 | 0.90126496 | 0.43048748 | 0.00309018 | 4 |
| 2021-03-22-15-36-CSLIB | C | Dry | 15 | 1.01551293 | 0.014332 | 0.100441 | 10.881507  | 0.3854019  | 0.95015391 | 0.4056205  | 0.02116344 | 3 |
| 2021-03-23-06-00-CSLIB | C | Dry | 06 | 0.98702047 | 0.67089  | 0.162723 | 12.2176989 | 0.53922086 | 0.98771063 | 0.54593    | 0.31674977 | 5 |
| 2021-03-24-05-00-CSLIB | C | Dry | 05 | 1.03003793 | 0.897965 | 0.212958 | 14.122856  | 0.54310746 | 0.98302233 | 0.55248741 | 0.29197907 | 5 |
| 2021-03-25-07-30-CSLIB | C | Dry | 07 | 1.01054796 | 0.283407 | 0.121101 | 11.6171855 | 0.46000026 | 0.98451494 | 0.46723543 | 0.0767867  | 5 |

|                        |   |     |    |            |          |          |            |            |            |            |            |   |
|------------------------|---|-----|----|------------|----------|----------|------------|------------|------------|------------|------------|---|
| 2021-03-26-07-36-CSLIB | C | Dry | 07 | 1.00142138 | 0.440762 | 0.134189 | 14.726391  | 0.46700055 | 0.98724397 | 0.47303459 | 0.05894737 | 3 |
| 2021-03-27-06-36-CSLIB | C | Dry | 06 | 1.0204274  | 0.359019 | 0.123371 | 10.330934  | 0.43836475 | 0.98768952 | 0.44382849 | 0.07859649 | 3 |
| 2021-03-27-17-12-CSLIB | C | Dry | 17 | 1.04202559 | 0.094494 | 0.105997 | 8.33288202 | 0.45544363 | 0.97656071 | 0.46637513 | 0.1189289  | 2 |
| 2021-03-28-17-30-CSLIB | C | Dry | 17 | 1.03779033 | 0.336698 | 0.123934 | 10.0225666 | 0.46374742 | 0.98313402 | 0.47170316 | 0.18629732 | 1 |
| 2021-03-28-18-12-CSLIB | C | Dry | 18 | 1.02377909 | 0.685746 | 0.167421 | 10.9751594 | 0.51230662 | 0.95872591 | 0.53436192 | 0.01654663 | 0 |
| 2021-03-30-16-18-CSLIB | C | Dry | 16 | 1.02718622 | 0.052618 | 0.102602 | 13.345608  | 0.4222946  | 0.97989625 | 0.43095849 | 0.14497999 | 2 |
| 2021-03-31-05-00-CSLIB | C | Dry | 05 | 1.01999111 | 0.526052 | 0.147624 | 10.8487296 | 0.49034143 | 0.96956856 | 0.50573157 | 0.04034472 | 4 |
| 2021-03-31-16-48-CSLIB | C | Dry | 16 | 1.08205112 | 0.081516 | 0.103175 | 9.92846015 | 0.36266775 | 0.93711666 | 0.38700384 | 0.0145891  | 3 |
| 2021-04-01-15-00-CSLIB | C | Dry | 15 | 1.11668011 | 0.0293   | 0.100972 | 8.00557137 | 0.31104258 | 0.91722618 | 0.33911219 | 0.00435826 | 2 |
| 2021-04-01-16-54-CSLIB | C | Dry | 16 | 1.05569747 | 0.550218 | 0.144965 | 11.8420794 | 0.56136075 | 0.98029258 | 0.57264613 | 0.03545706 | 0 |
| 2021-04-02-14-06-CSLIB | C | Dry | 14 | 1.08252414 | 0.008049 | 0.100282 | 10.1459548 | 0.33730577 | 0.94825852 | 0.35571077 | 0.00384118 | 4 |
| 2021-04-04-09-12-CSLIB | C | Dry | 09 | 1.00648005 | 0.255398 | 0.11426  | 11.333274  | 0.41217898 | 0.98537668 | 0.41829586 | 0.01024315 | 4 |
| 2021-04-04-15-00-CSLIB | C | Dry | 15 | 1.03284215 | 0.332684 | 0.123786 | 11.0174461 | 0.44808878 | 0.97153718 | 0.46121629 | 0.00920899 | 5 |
| 2021-04-04-15-06-CSLIB | C | Dry | 15 | 1.03301343 | 0.86197  | 0.207663 | 14.086776  | 0.50827191 | 0.98123934 | 0.51798974 | 0.06371191 | 4 |
| 2021-04-06-09-24-CSLIB | C | Dry | 09 | 0.92606721 | 0.467437 | 0.156648 | 10.4484237 | 0.41111407 | 0.98016344 | 0.4194342  | 0.10762696 | 3 |
| 2021-04-06-16-18-CSLIB | C | Dry | 16 | 1.04238096 | 0.433225 | 0.135219 | 9.44498255 | 0.47472408 | 0.98105008 | 0.48389383 | 0.20178517 | 1 |
| 2021-04-07-08-24-CSLIB | C | Dry | 08 | 1.01767933 | 0.215737 | 0.112021 | 10.1599523 | 0.39621091 | 0.97317679 | 0.40713148 | 0.08244999 | 3 |
| 2021-04-08-05-24-CSLIB | C | Dry | 05 | 1.01577778 | 0.291427 | 0.11774  | 12.0855228 | 0.40292055 | 0.98590215 | 0.40868209 | 0.17525392 | 4 |
| 2021-04-10-09-30-CSLIB | C | Dry | 09 | 1.04171433 | 0.364085 | 0.128366 | 14.042547  | 0.42082217 | 0.96250545 | 0.43721537 | 0.03955679 | 7 |
| 2021-04-11-10-06-CSLIB | C | Dry | 10 | 1.01558938 | 0.259473 | 0.117461 | 13.974783  | 0.43392291 | 0.954503   | 0.45460613 | 0.00027085 | 6 |
| 2021-04-13-08-00-CSLIB | C | Dry | 08 | 0.96225462 | 1.003617 | 0.237572 | 9.90045783 | 0.59232265 | 0.98571382 | 0.60090732 | 0.12705448 | 3 |
| 2021-04-13-14-18-CSLIB | C | Dry | 14 | 1.0308821  | 0.389975 | 0.126291 | 14.1191967 | 0.40118777 | 0.98197457 | 0.40855209 | 0.17373961 | 4 |
| 2021-04-14-11-18-CSLIB | C | Dry | 11 | 0.95331735 | 0.959415 | 0.220259 | 8.46435869 | 0.53570385 | 0.98051396 | 0.54635005 | 0.09418283 | 2 |
| 2021-04-15-13-00-CSLIB | C | Dry | 13 | 1.01335893 | 0.155116 | 0.107824 | 9.52179634 | 0.42322945 | 0.983833   | 0.43018424 | 0.21430594 | 4 |
| 2021-04-16-15-36-CSLIB | C | Dry | 15 | 1.05258752 | 0.328801 | 0.133798 | 8.30173069 | 0.4395831  | 0.98102705 | 0.44808458 | 0.20800246 | 5 |
| 2021-04-19-13-12-CSLIB | C | Dry | 13 | 1.01145956 | 0.291335 | 0.119186 | 7.19736374 | 0.47963739 | 0.98733437 | 0.48579023 | 0.10006771 | 2 |
| 2021-04-20-06-30-CSLIB | C | Dry | 06 | 0.98291506 | 1.419208 | 0.3286   | 11.1565415 | 0.57850623 | 0.98626136 | 0.58656484 | 0.41237304 | 2 |
| 2021-04-21-14-36-CSLIB | C | Dry | 14 | 0.99456994 | 0.117039 | 0.105094 | 8.17401148 | 0.47926245 | 0.98674925 | 0.48569832 | 0.16318867 | 3 |



|                        |   |     |    |            |          |          |            |            |            |            |            |   |
|------------------------|---|-----|----|------------|----------|----------|------------|------------|------------|------------|------------|---|
| 2021-04-22-07-42-CSLIB | C | Dry | 07 | 1.00414654 | 0.991837 | 0.275726 | 6.92307522 | 0.50766617 | 0.98624704 | 0.51474545 | 0.11609726 | 5 |
| 2021-04-22-09-00-CSLIB | C | Dry | 09 | 0.9449784  | 1.520469 | 0.361147 | 11.0252453 | 0.61730753 | 0.98263908 | 0.6282139  | 0.25174515 | 5 |
| 2021-04-22-17-18-CSLIB | C | Dry | 17 | 1.05461578 | 1.298929 | 0.303291 | 13.3009188 | 0.619674   | 0.98134873 | 0.63145137 | 0.08354571 | 1 |
| 2021-04-24-10-18-CSLIB | C | Dry | 10 | 0.98150598 | 0.335664 | 0.133251 | 5.45100787 | 0.49827584 | 0.98764834 | 0.50450735 | 0.10113881 | 6 |
| 2021-04-24-16-12-CSLIB | C | Dry | 16 | 1.0816537  | 1.160093 | 0.264559 | 13.8911666 | 0.57564068 | 0.98681834 | 0.58332994 | 0.08411203 | 1 |
| 2021-04-25-13-36-CSLIB | C | Dry | 13 | 0.97569632 | 0.21846  | 0.112214 | 7.95443158 | 0.50023321 | 0.96130381 | 0.52036953 | 0.00066482 | 4 |
| 2021-04-26-06-30-CSLIB | C | Dry | 06 | 0.96841994 | 1.078014 | 0.231693 | 7.5316155  | 0.70742167 | 0.97306991 | 0.72699984 | 0.09795014 | 2 |
| 2021-04-26-10-48-CSLIB | C | Dry | 10 | 0.99106972 | 0.174461 | 0.111325 | 13.5163466 | 0.40235081 | 0.98781572 | 0.40731364 | 0.2550077  | 4 |
| 2021-04-26-17-18-CSLIB | C | Dry | 17 | 1.07670751 | 0.608694 | 0.151285 | 13.6820768 | 0.58016257 | 0.97939543 | 0.59236805 | 0.11353647 | 0 |
| 2021-04-29-08-00-CSLIB | C | Dry | 08 | 0.96954684 | 0.484106 | 0.150928 | 10.1674828 | 0.45067074 | 0.98657586 | 0.45680292 | 0.1859526  | 5 |
| 2021-05-01-12-48-CSLIB | C | Wet | 12 | 0.93097757 | 1.532348 | 0.361769 | 8.10386376 | 0.69611199 | 0.98178896 | 0.70902405 | 0.2498615  | 4 |
| 2021-05-01-16-06-CSLIB | C | Wet | 16 | 0.98022094 | 0.409085 | 0.135562 | 7.03150561 | 0.49677405 | 0.98795557 | 0.50283035 | 0.17141274 | 2 |
| 2021-05-02-11-12-CSLIB | C | Wet | 11 | 0.93910822 | 0.923014 | 0.251182 | 9.8308918  | 0.5820651  | 0.98796738 | 0.58915417 | 0.02698677 | 3 |
| 2021-05-02-11-18-CSLIB | C | Wet | 11 | 0.97198045 | 1.176614 | 0.301399 | 6.96593065 | 0.62874792 | 0.98612738 | 0.63759301 | 0.02515236 | 5 |
| 2021-05-04-08-06-CSLIB | C | Wet | 08 | 0.944122   | 0.214682 | 0.11468  | 8.58397151 | 0.55788828 | 0.98094664 | 0.56872439 | 0.23933518 | 3 |
| 2021-05-06-08-00-CSLIB | C | Wet | 08 | 0.97034235 | 0.646995 | 0.169264 | 9.55146705 | 0.60675478 | 0.97030319 | 0.62532494 | 0.05633734 | 5 |
| 2021-05-08-09-06-CSLIB | C | Wet | 09 | 0.96807694 | 1.623272 | 0.446252 | 10.9876076 | 0.70636937 | 0.98550047 | 0.71676209 | 0.46499231 | 5 |
| 2021-05-09-10-24-CSLIB | C | Wet | 10 | 0.97823591 | 1.629416 | 0.440341 | 13.8410433 | 0.74582413 | 0.98535541 | 0.75690875 | 0.22936288 | 1 |
| 2021-05-11-08-24-CSLIB | C | Wet | 08 | 1.02570113 | 1.890847 | 0.520123 | 16.1103181 | 0.79300702 | 0.97383249 | 0.81431563 | 0.13156048 | 2 |
| 2021-05-11-09-30-CSLIB | C | Wet | 09 | 0.98857364 | 1.832535 | 0.485834 | 14.0515809 | 0.74076716 | 0.9837588  | 0.75299673 | 0.25440443 | 3 |
| 2021-05-11-10-42-CSLIB | C | Wet | 10 | 0.97401432 | 1.661237 | 0.445195 | 10.5038339 | 0.76679938 | 0.9851317  | 0.77837245 | 0.54751616 | 4 |
| 2021-05-12-09-54-CSLIB | C | Wet | 09 | 0.98223533 | 1.640374 | 0.430122 | 12.9725574 | 0.74912616 | 0.98345004 | 0.76173281 | 0.48256079 | 3 |
| 2021-05-15-13-00-CSLIB | C | Wet | 13 | 0.96930611 | 0.8203   | 0.185219 | 10.2321037 | 0.61058874 | 0.97572384 | 0.62578028 | 0.08376731 | 3 |
| 2021-05-16-13-18-CSLIB | C | Wet | 13 | 0.97763033 | 0.016836 | 0.10057  | 6.95021817 | 0.68631403 | 0.96151605 | 0.71378323 | 0.01730994 | 3 |
| 2021-05-17-16-54-CSLIB | C | Wet | 16 | 1.10484128 | 0.06205  | 0.102369 | 16.8813882 | 0.47919613 | 0.95666475 | 0.50090288 | 0.03068021 | 1 |
| 2021-05-19-15-48-CSLIB | C | Wet | 15 | 0.98289838 | 0.17914  | 0.109753 | 7.42997058 | 0.54709588 | 0.97123966 | 0.56329648 | 0.05606648 | 2 |
| 2021-05-21-07-18-CSLIB | C | Wet | 07 | 0.99315888 | 1.803682 | 0.511422 | 12.2873113 | 0.80032794 | 0.98746143 | 0.81049033 | 0.70371191 | 3 |
| 2021-05-21-15-42-CSLIB | C | Wet | 15 | 1.03602419 | 0.434234 | 0.141985 | 13.0662412 | 0.48199128 | 0.98738576 | 0.4881489  | 0.12070175 | 2 |

|                        |   |     |    |            |          |          |            |            |            |            |            |   |
|------------------------|---|-----|----|------------|----------|----------|------------|------------|------------|------------|------------|---|
| 2021-05-22-09-12-CSLIB | C | Wet | 09 | 0.9902269  | 1.676198 | 0.44757  | 12.4043803 | 0.76315004 | 0.98044098 | 0.77837428 | 0.30040012 | 3 |
| 2021-05-22-14-54-CSLIB | C | Wet | 14 | 0.99548902 | 1.88966  | 0.518493 | 7.63534781 | 0.77505082 | 0.98422503 | 0.78747318 | 0.1358695  | 3 |
| 2021-05-22-15-42-CSLIB | C | Wet | 15 | 1.01107897 | 0.259816 | 0.121461 | 9.54988544 | 0.43620195 | 0.98814248 | 0.44143629 | 0.07213296 | 6 |
| 2021-05-23-05-06-CSLIB | C | Wet | 05 | 0.99638494 | 1.655588 | 0.439149 | 13.8818932 | 0.81010481 | 0.98712911 | 0.82066753 | 0.84052939 | 3 |
| 2021-05-23-05-30-CSLIB | C | Wet | 05 | 0.99834831 | 1.618609 | 0.416954 | 14.8927048 | 0.80451978 | 0.98441147 | 0.81725965 | 0.60584795 | 4 |
| 2021-05-25-11-06-CSLIB | C | Wet | 11 | 0.98489067 | 1.695413 | 0.450983 | 10.4734846 | 0.77391691 | 0.98606496 | 0.78485388 | 0.5736165  | 4 |
| 2021-05-28-12-54-CSLIB | C | Wet | 12 | 0.97350522 | 1.410809 | 0.324775 | 8.27400344 | 0.67473565 | 0.97605058 | 0.69129169 | 0.19304401 | 2 |
| 2021-05-29-17-00-CSLIB | C | Wet | 17 | 0.99167796 | 1.151552 | 0.253154 | 13.4085395 | 0.61556704 | 0.98936747 | 0.62218241 | 0.05614035 | 1 |
| 2021-05-30-06-24-CSLIB | C | Wet | 06 | 0.99511242 | 1.68187  | 0.448258 | 14.5999601 | 0.79874135 | 0.98624519 | 0.80988111 | 0.65408433 | 4 |
| 2021-06-01-09-00-CSLIB | C | Wet | 09 | 0.98514468 | 1.670754 | 0.448757 | 12.5703141 | 0.76761446 | 0.98454578 | 0.77966356 | 0.5497076  | 3 |
| 2021-06-02-11-48-CSLIB | C | Wet | 11 | 0.99015614 | 0.298314 | 0.128895 | 5.09621935 | 0.52769888 | 0.97895739 | 0.53904173 | 0.26874731 | 1 |
| 2021-06-02-16-18-CSLIB | C | Wet | 16 | 1.02959158 | 0.4458   | 0.130465 | 13.3982646 | 0.54060965 | 0.98180607 | 0.55062773 | 0.35265005 | 3 |
| 2021-06-04-05-06-CSLIB | C | Wet | 05 | 1.00903131 | 1.896573 | 0.578525 | 14.928716  | 0.81659829 | 0.98771027 | 0.82675893 | 0.92369344 | 0 |
| 2021-06-04-09-06-CSLIB | C | Wet | 09 | 0.99289058 | 1.769668 | 0.492227 | 11.4242113 | 0.79221772 | 0.98712747 | 0.80254856 | 0.60634041 | 4 |
| 2021-06-05-05-42-CSLIB | C | Wet | 05 | 0.99835458 | 1.807259 | 0.500986 | 11.4327091 | 0.79270892 | 0.98639529 | 0.80364224 | 0.65684211 | 5 |
| 2021-06-06-05-06-CSLIB | C | Wet | 05 | 1.01158997 | 1.846558 | 0.536267 | 14.4561058 | 0.80872645 | 0.98484963 | 0.82116744 | 0.67767313 | 3 |
| 2021-06-06-05-48-CSLIB | C | Wet | 05 | 1.02074545 | 1.798601 | 0.497147 | 11.3097837 | 0.80916912 | 0.98571628 | 0.82089455 | 0.39091413 | 3 |
| 2021-06-06-11-24-CSLIB | C | Wet | 11 | 0.99094297 | 1.626546 | 0.418963 | 11.4154085 | 0.75798336 | 0.98531481 | 0.76928039 | 0.13188058 | 3 |
| 2021-06-06-12-00-CSLIB | C | Wet | 12 | 0.98274369 | 1.683124 | 0.450148 | 11.4476804 | 0.74433304 | 0.98386057 | 0.75654322 | 0.21052632 | 4 |
| 2021-06-08-18-12-CSLIB | C | Wet | 18 | 1.01732317 | 0.817769 | 0.196357 | 12.5576784 | 0.55605942 | 0.9828278  | 0.56577502 | 0.27516159 | 0 |
| 2021-06-09-16-24-CSLIB | C | Wet | 16 | 1.00311028 | 0.097369 | 0.104978 | 7.23127357 | 0.57947208 | 0.98126017 | 0.59053868 | 0.17280394 | 1 |
| 2021-06-12-07-36-CSLIB | C | Wet | 07 | 1.00171597 | 1.715808 | 0.454365 | 10.7783798 | 0.75918619 | 0.985458   | 0.77038919 | 0.57396122 | 1 |
| 2021-06-16-06-24-CSLIB | C | Wet | 06 | 0.99302653 | 1.636589 | 0.424242 | 11.8366792 | 0.76745369 | 0.98263567 | 0.7810155  | 0.3080948  | 3 |
| 2021-06-16-12-24-CSLIB | C | Wet | 12 | 0.96382367 | 1.700012 | 0.462727 | 7.43371903 | 0.75858513 | 0.98784748 | 0.76791726 | 0.22603878 | 2 |
| 2021-06-18-08-30-CSLIB | C | Wet | 08 | 0.94423245 | 2.206799 | 0.762316 | 4.18919353 | 0.81544079 | 0.98739235 | 0.82585285 | 0.85775316 | 2 |
| 2021-06-18-11-24-CSLIB | C | Wet | 11 | 0.96596091 | 1.511951 | 0.363471 | 7.37436136 | 0.70488714 | 0.98512447 | 0.71553104 | 0.2374269  | 4 |
| 2021-06-20-07-48-CSLIB | C | Wet | 07 | 0.95755153 | 1.626103 | 0.392749 | 14.1062601 | 0.71430518 | 0.98183971 | 0.72751711 | 0.07694675 | 3 |
| 2021-06-23-12-06-CSLIB | C | Wet | 12 | 0.97327353 | 1.574179 | 0.367711 | 9.28158656 | 0.74569639 | 0.98735892 | 0.75524349 | 0.35929825 | 2 |

|                        |   |     |    |            |          |          |            |            |            |            |            |   |
|------------------------|---|-----|----|------------|----------|----------|------------|------------|------------|------------|------------|---|
| 2021-06-23-15-00-CSLIB | C | Wet | 15 | 1.007083   | 0.884029 | 0.226156 | 7.63064406 | 0.56636914 | 0.98799984 | 0.57324821 | 0.08802709 | 3 |
| 2021-06-23-16-36-CSLIB | C | Wet | 16 | 0.98184917 | 1.992616 | 0.591685 | 15.631296  | 0.78468424 | 0.98888907 | 0.79350077 | 0.52959064 | 0 |
| 2021-06-25-14-42-CSLIB | C | Wet | 14 | 0.9930656  | 0.444564 | 0.14753  | 6.03363132 | 0.52988453 | 0.98634391 | 0.53722087 | 0.34136042 | 3 |
| 2021-06-25-18-00-CSLIB | C | Wet | 18 | 1.05223    | 1.037047 | 0.229155 | 12.983196  | 0.58123703 | 0.9881001  | 0.58823699 | 0.43310557 | 1 |
| 2021-06-25-18-24-CSLIB | C | Wet | 18 | 1.04577719 | 1.039679 | 0.227449 | 15.2341273 | 0.57235513 | 0.98734475 | 0.57969127 | 0.42382272 | 2 |
| 2021-06-30-07-48-CSLIB | C | Wet | 07 | 0.95386269 | 0.853429 | 0.197411 | 7.91419512 | 0.55511853 | 0.98052666 | 0.56614323 | 0.21303786 | 2 |
| 2021-07-01-08-48-CSLIB | C | Wet | 08 | 0.9300809  | 0.249568 | 0.114668 | 8.74445435 | 0.47055224 | 0.97582913 | 0.48220762 | 0.13407202 | 3 |
| 2021-07-04-10-12-CSLIB | C | Wet | 10 | 0.96324206 | 1.668961 | 0.449637 | 11.2274707 | 0.71129063 | 0.97849836 | 0.72692062 | 0.08947984 | 3 |
| 2021-07-04-14-06-CSLIB | C | Wet | 14 | 1.03314304 | 0.371531 | 0.140619 | 7.2388229  | 0.50194609 | 0.97879816 | 0.5128188  | 0.24631579 | 1 |
| 2021-07-06-07-42-CSLIB | C | Wet | 07 | 0.94526139 | 1.630934 | 0.405326 | 9.92980324 | 0.66602036 | 0.98564106 | 0.67572303 | 0.58478301 | 3 |
| 2021-07-06-15-36-CSLIB | C | Wet | 15 | 1.00479875 | 0.548166 | 0.160133 | 10.3074093 | 0.48873586 | 0.98827673 | 0.4945334  | 0.67565405 | 2 |
| 2021-07-07-10-00-CSLIB | C | Wet | 10 | 0.96137648 | 0.129696 | 0.111286 | 7.72064546 | 0.46438172 | 0.98251633 | 0.47264529 | 0.41366574 | 4 |
| 2021-07-09-05-48-CSLIB | C | Wet | 05 | 0.94905833 | 1.431116 | 0.322723 | 9.87710888 | 0.68023931 | 0.97518239 | 0.69755086 | 0.11862111 | 5 |
| 2021-07-09-08-00-CSLIB | C | Wet | 08 | 0.9685563  | 0.648061 | 0.156804 | 10.9063471 | 0.59576152 | 0.97457354 | 0.61130484 | 0.13185596 | 2 |
| 2021-07-10-11-36-CSLIB | C | Wet | 11 | 0.9612522  | 0.350999 | 0.137459 | 8.47086065 | 0.50473337 | 0.97552574 | 0.51739626 | 0.14158203 | 5 |
| 2021-07-11-11-12-CSLIB | C | Wet | 11 | 0.94442925 | 0.370649 | 0.129569 | 9.7373548  | 0.61638991 | 0.96771155 | 0.63695624 | 0.0543675  | 4 |
| 2021-07-12-08-54-CSLIB | C | Wet | 08 | 0.94450218 | 0.07146  | 0.103666 | 10.1634251 | 0.40770915 | 0.98278679 | 0.41485005 | 0.36919668 | 2 |
| 2021-07-13-06-48-CSLIB | C | Wet | 06 | 0.96597423 | 1.579929 | 0.381522 | 9.11071084 | 0.67966575 | 0.98677946 | 0.68877169 | 0.36498615 | 3 |
| 2021-07-13-16-42-CSLIB | C | Wet | 16 | 1.06419512 | 0.638953 | 0.152479 | 12.4344232 | 0.48247434 | 0.98591404 | 0.48936755 | 0.46044937 | 1 |
| 2021-07-14-14-12-CSLIB | C | Wet | 14 | 0.96838305 | 0.216616 | 0.112161 | 9.77915373 | 0.39453131 | 0.98668504 | 0.39985537 | 0.38546014 | 4 |
| 2021-07-15-05-06-CSLIB | C | Wet | 05 | 0.95394789 | 0.042877 | 0.10248  | 6.31301265 | 0.5327827  | 0.97704288 | 0.54530125 | 0.13569714 | 5 |
| 2021-07-15-05-12-CSLIB | C | Wet | 05 | 0.96721599 | 1.431652 | 0.326917 | 11.4312836 | 0.6424683  | 0.98658606 | 0.6512035  | 0.69444137 | 5 |
| 2021-07-15-06-36-CSLIB | C | Wet | 06 | 0.98364968 | 2.034525 | 0.627643 | 12.3009334 | 0.79068817 | 0.98591809 | 0.8019816  | 0.72102185 | 2 |
| 2021-07-15-10-00-CSLIB | C | Wet | 10 | 0.99328368 | 1.488666 | 0.345952 | 6.7326293  | 0.8302985  | 0.98461861 | 0.84326915 | 0.58149585 | 0 |
| 2021-07-15-12-48-CSLIB | C | Wet | 12 | 0.92693568 | 0.788636 | 0.18546  | 9.74318368 | 0.58743845 | 0.98111787 | 0.59874402 | 0.31580179 | 2 |
| 2021-07-18-13-30-CSLIB | C | Wet | 13 | 1.00365278 | 0.504248 | 0.153994 | 9.35729547 | 0.50835004 | 0.98139767 | 0.51798578 | 0.05811019 | 4 |
| 2021-07-19-08-00-CSLIB | C | Wet | 08 | 0.97983927 | 0.132349 | 0.109348 | 5.66534753 | 0.46522312 | 0.986778   | 0.47145672 | 0.50351493 | 5 |
| 2021-07-20-18-12-CSLIB | C | Wet | 18 | 0.98654061 | 0.271694 | 0.115703 | 10.787929  | 0.41253245 | 0.98105178 | 0.42050018 | 0.11069252 | 1 |

|                        |   |     |    |            |          |          |            |            |            |            |            |   |
|------------------------|---|-----|----|------------|----------|----------|------------|------------|------------|------------|------------|---|
| 2021-07-21-13-06-CSLIB | C | Wet | 13 | 0.98876106 | 0.466854 | 0.140594 | 7.306318   | 0.60861497 | 0.98333052 | 0.61893225 | 0.38017852 | 2 |
| 2021-07-22-05-36-CSLIB | C | Wet | 05 | 1.00181612 | 0.257124 | 0.121114 | 16.0904811 | 0.45089525 | 0.98672022 | 0.45696363 | 0.31911357 | 6 |
| 2021-07-22-08-24-CSLIB | C | Wet | 08 | 0.99083149 | 1.311721 | 0.281406 | 7.29203921 | 0.6836393  | 0.98693025 | 0.69269262 | 0.64509695 | 3 |
| 2021-07-22-10-12-CSLIB | C | Wet | 10 | 0.99078129 | 0.330994 | 0.135301 | 9.9704043  | 0.48967622 | 0.98595553 | 0.49665143 | 0.3143121  | 4 |
| 2021-07-22-18-48-CSLIB | C | Wet | 18 | 1.00582261 | 0.83663  | 0.180847 | 7.40876822 | 0.70256414 | 0.98367949 | 0.71422059 | 0.08635272 | 0 |
| 2021-07-23-18-48-CSLIB | C | Wet | 18 | 1.00615128 | 0.104243 | 0.104378 | 6.6699452  | 0.59092136 | 0.9626044  | 0.61387768 | 0.01923053 | 0 |
| 2021-07-25-07-00-CSLIB | C | Wet | 07 | 0.98201177 | 1.592724 | 0.376384 | 5.02464004 | 0.73584775 | 0.98736304 | 0.74526564 | 0.24679594 | 1 |
| 2021-07-26-18-48-CSLIB | C | Wet | 18 | 1.00298507 | 0.305978 | 0.122006 | 6.85312976 | 0.47550659 | 0.98801504 | 0.48127465 | 0.02038781 | 0 |
| 2021-07-27-18-00-CSLIB | C | Wet | 18 | 1.02541168 | 0.048078 | 0.103233 | 6.41346295 | 0.44339483 | 0.98317551 | 0.45098238 | 0.01370268 | 0 |
| 2021-07-29-10-54-CSLIB | C | Wet | 10 | 0.99413582 | 1.908737 | 0.537217 | 16.198411  | 0.78511138 | 0.9890703  | 0.79378724 | 0.99649123 | 1 |
| 2021-07-29-12-00-CSLIB | C | Wet | 12 | 1.04462692 | 0.059991 | 0.103315 | 13.4992466 | 0.43073868 | 0.98344635 | 0.437989   | 0.40536781 | 1 |
| 2021-07-30-12-36-CSLIB | C | Wet | 12 | 0.98080544 | 1.312493 | 0.298797 | 8.89662302 | 0.71338597 | 0.98791655 | 0.72211157 | 0.52240074 | 0 |
| 2021-08-01-06-48-CSLIB | C | Wet | 06 | 1.00545218 | 0.428548 | 0.137406 | 16.2896416 | 0.47920042 | 0.98763529 | 0.48519977 | 0.11700831 | 4 |
| 2021-08-03-15-24-CSLIB | C | Wet | 15 | 1.02652106 | 1.488979 | 0.354671 | 7.29851812 | 0.63981729 | 0.98831398 | 0.64738261 | 0.22914127 | 0 |
| 2021-08-04-11-30-CSLIB | C | Wet | 11 | 0.99433353 | 1.369731 | 0.312964 | 7.78025748 | 0.65711951 | 0.98315405 | 0.66837899 | 0.39487842 | 1 |
| 2021-08-05-09-42-CSLIB | C | Wet | 09 | 0.98781251 | 0.57242  | 0.156008 | 6.20422218 | 0.55390625 | 0.98507129 | 0.56230068 | 0.35634349 | 4 |
| 2021-08-06-12-48-CSLIB | C | Wet | 12 | 0.9969517  | 0.027345 | 0.100888 | 8.27627119 | 0.62588376 | 0.95960372 | 0.65223149 | 0.01527855 | 1 |
| 2021-08-07-06-06-CSLIB | C | Wet | 06 | 0.99688459 | 0.941872 | 0.21647  | 6.71119257 | 0.58887008 | 0.9857094  | 0.59740739 | 0.13963681 | 5 |
| 2021-08-09-14-54-CSLIB | C | Wet | 14 | 0.9602338  | 0.060035 | 0.102176 | 4.22098395 | 0.35456101 | 0.98442876 | 0.36016929 | 0.06640813 | 1 |
| 2021-08-13-11-00-CSLIB | C | Wet | 11 | 0.98914491 | 1.249918 | 0.274195 | 17.5098341 | 0.74078997 | 0.98314999 | 0.75348622 | 0.54701139 | 0 |
| 2021-08-15-15-36-CSLIB | C | Wet | 15 | 1.02248473 | 0.117122 | 0.105728 | 6.41739884 | 0.41219051 | 0.9828702  | 0.41937431 | 0.10341644 | 0 |
| 2021-08-16-08-54-CSLIB | C | Wet | 08 | 1.00645052 | 0.026003 | 0.10126  | 6.45932252 | 0.36031559 | 0.98022889 | 0.36758312 | 0.05146199 | 3 |
| 2021-08-22-11-54-CSLIB | C | Wet | 11 | 0.99181751 | 1.065876 | 0.24352  | 11.5114637 | 0.67394727 | 0.97712133 | 0.68972732 | 0.04866728 | 2 |
| 2021-08-26-17-00-CSLIB | C | Wet | 17 | 0.98838912 | 0.042196 | 0.101772 | 13.7089977 | 0.42550906 | 0.98418811 | 0.43234526 | 0.14517698 | 0 |
| 2021-08-27-10-00-CSLIB | C | Wet | 10 | 0.98793547 | 0.30539  | 0.120332 | 8.35303943 | 0.51103649 | 0.98555826 | 0.51852489 | 0.49068637 | 3 |
| 2021-08-27-13-30-CSLIB | C | Wet | 13 | 0.9841629  | 1.40852  | 0.322222 | 9.38571609 | 0.59182395 | 0.98520277 | 0.60071284 | 0.43915051 | 2 |
| 2021-08-29-06-36-CSLIB | C | Wet | 06 | 0.99940779 | 0.06356  | 0.104517 | 11.7999316 | 0.35043767 | 0.9797122  | 0.35769451 | 0.09423207 | 3 |
| 2021-08-29-17-18-CSLIB | C | Wet | 17 | 1.07513652 | 0.88346  | 0.198695 | 11.7057486 | 0.49012637 | 0.97746594 | 0.50142552 | 0.02888273 | 0 |

|                        |   |     |    |            |          |          |            |            |            |            |            |   |
|------------------------|---|-----|----|------------|----------|----------|------------|------------|------------|------------|------------|---|
| 2021-08-30-11-42-CSLIB | C | Wet | 11 | 1.05240003 | 0.097944 | 0.107574 | 10.7327699 | 0.42631323 | 0.93714905 | 0.45490441 | 0.02016621 | 1 |
| 2021-08-31-09-00-CSLIB | C | Wet | 09 | 0.96904178 | 0.757979 | 0.168097 | 9.22339094 | 0.52386562 | 0.976155   | 0.53666233 | 0.18736842 | 2 |
| 2021-09-01-09-00-CSLIB | C | Wet | 09 | 0.97594339 | 1.047943 | 0.227636 | 18.2197204 | 0.71600957 | 0.97539455 | 0.73407174 | 0.17132656 | 0 |
| 2021-09-02-10-54-CSLIB | C | Wet | 10 | 0.98985283 | 1.286246 | 0.279257 | 13.6169036 | 0.77433912 | 0.98444164 | 0.78657697 | 0.60088643 | 1 |
| 2021-09-03-17-48-CSLIB | C | Wet | 17 | 0.99482908 | 0.322072 | 0.129556 | 9.35231834 | 0.52140955 | 0.96393654 | 0.54091689 | 0.05493383 | 0 |
| 2021-09-05-09-00-CSLIB | C | Wet | 09 | 0.9599189  | 0.084309 | 0.106769 | 6.25558627 | 0.37914744 | 0.9808017  | 0.38656891 | 0.00658664 | 2 |
| 2021-09-05-17-30-CSLIB | C | Wet | 17 | 1.00984121 | 0.030643 | 0.10106  | 5.99853312 | 0.3694777  | 0.97485886 | 0.37900635 | 0.03811634 | 0 |
| 2021-09-06-12-54-CSLIB | C | Wet | 12 | 1.00513804 | 0.159622 | 0.113373 | 9.62646867 | 0.39604446 | 0.98441108 | 0.40231613 | 0.59351185 | 3 |
| 2021-09-07-06-18-CSLIB | C | Wet | 06 | 0.99179131 | 0.764538 | 0.171611 | 7.81279413 | 0.64553441 | 0.984371   | 0.65578365 | 0.57585719 | 0 |
| 2021-09-12-07-30-CSLIB | C | Wet | 07 | 0.99913215 | 1.996638 | 0.595426 | 12.7625229 | 0.77543991 | 0.97552662 | 0.79489364 | 0.08853186 | 3 |
| 2021-09-12-18-00-CSLIB | C | Wet | 18 | 1.03307966 | 0.195315 | 0.109716 | 17.4715523 | 0.43439438 | 0.96996582 | 0.44784504 | 0.04062789 | 0 |
| 2021-09-16-16-54-CSLIB | C | Wet | 16 | 0.9894509  | 0.064148 | 0.103334 | 6.97348799 | 0.49028372 | 0.97875734 | 0.50092469 | 0.12705448 | 0 |
| 2021-09-18-18-12-CSLIB | C | Wet | 18 | 1.00426166 | 0.30369  | 0.120136 | 12.1644914 | 0.38305091 | 0.97642532 | 0.39229924 | 0.1528101  | 0 |
| 2021-09-19-10-24-CSLIB | C | Wet | 10 | 0.98225599 | 1.562522 | 0.367705 | 10.8650666 | 0.63657069 | 0.9866057  | 0.64521287 | 0.4072884  | 2 |
| 2021-09-19-18-30-CSLIB | C | Wet | 18 | 0.98289562 | 0.160378 | 0.110122 | 10.8766276 | 0.41234769 | 0.9798029  | 0.42084759 | 0.03921207 | 0 |
| 2021-09-20-18-12-CSLIB | C | Wet | 18 | 0.99268962 | 0.409312 | 0.128723 | 7.59489183 | 0.46730726 | 0.98176454 | 0.4759871  | 0.28838412 | 0 |
| 2021-09-21-11-18-CSLIB | C | Wet | 11 | 0.98132549 | 0.319073 | 0.122829 | 15.5914321 | 0.56746233 | 0.95511272 | 0.59413127 | 0.04062789 | 0 |
| 2021-09-23-06-18-CSLIB | C | Wet | 06 | 0.98724942 | 0.138619 | 0.110819 | 8.64001305 | 0.38998859 | 0.97537517 | 0.39983445 | 0.12705448 | 7 |
| 2021-09-23-17-06-CSLIB | C | Wet | 17 | 1.03355838 | 0.20978  | 0.112138 | 8.90330408 | 0.41729732 | 0.98217939 | 0.42486874 | 0.19693444 | 1 |
| 2021-09-25-13-48-CSLIB | C | Wet | 13 | 0.98366915 | 1.738542 | 0.438971 | 11.0196346 | 0.7652763  | 0.98787466 | 0.77466943 | 0.8941582  | 1 |
| 2021-09-25-15-00-CSLIB | C | Wet | 15 | 0.9826498  | 0.705595 | 0.170306 | 16.1661012 | 0.508932   | 0.98462698 | 0.51687798 | 0.28038166 | 0 |
| 2021-09-26-13-48-CSLIB | C | Wet | 13 | 1.04457384 | 0.642218 | 0.157054 | 10.997774  | 0.45963062 | 0.98357546 | 0.4673059  | 0.11036011 | 0 |
| 2021-10-01-06-54-CSLIB | C | Wet | 06 | 0.93970851 | 0.150742 | 0.113445 | 13.0127858 | 0.4183759  | 0.98040277 | 0.42673879 | 0.16002462 | 3 |
| 2021-10-04-08-42-CSLIB | C | Wet | 08 | 0.99826826 | 0.021632 | 0.100873 | 8.61260106 | 0.5460699  | 0.96218038 | 0.56753381 | 0.06672822 | 0 |
| 2021-10-08-16-00-CSLIB | C | Wet | 16 | 0.98603563 | 0.262116 | 0.11734  | 9.98376711 | 0.40964563 | 0.97773355 | 0.41897471 | 0.08178517 | 1 |
| 2021-10-09-17-12-CSLIB | C | Wet | 17 | 1.01404602 | 0.035888 | 0.101373 | 6.87583711 | 0.38229637 | 0.98043396 | 0.38992567 | 0.03047091 | 1 |
| 2021-10-15-07-12-CSLIB | C | Wet | 07 | 0.96906477 | 0.688205 | 0.187829 | 9.18258182 | 0.47330402 | 0.9769178  | 0.48448704 | 0.19146814 | 4 |
| 2021-10-17-12-18-CSLIB | C | Wet | 12 | 0.98971286 | 0.109164 | 0.106273 | 10.7161476 | 0.40643956 | 0.9850054  | 0.41262673 | 0.15020006 | 0 |

|                        |   |     |    |            |          |          |            |            |            |            |            |   |
|------------------------|---|-----|----|------------|----------|----------|------------|------------|------------|------------|------------|---|
| 2021-10-19-18-00-CSLIB | C | Wet | 18 | 0.9593591  | 0.012701 | 0.100516 | 15.3277281 | 0.36910515 | 0.96936857 | 0.38076863 | 0.05032933 | 1 |
| 2021-10-21-17-54-CSLIB | C | Wet | 17 | 1.01577158 | 0.119353 | 0.105963 | 13.2463943 | 0.35522691 | 0.97682359 | 0.36365513 | 0.10548477 | 0 |
| 2021-11-17-16-00-CSLIB | C | Dry | 16 | 1.01226117 | 0.046006 | 0.102329 | 8.45858551 | 0.36054772 | 0.98005347 | 0.36788577 | 0.19578947 | 0 |
| 2021-11-18-12-06-CSLIB | C | Dry | 12 | 0.98769271 | 0.097449 | 0.105145 | 11.7039247 | 0.41879513 | 0.98164602 | 0.4266254  | 0.35901508 | 0 |
| 2021-11-22-11-42-CSLIB | C | Dry | 11 | 0.9459092  | 0.007376 | 0.100185 | 5.73760649 | 0.35270433 | 0.9742591  | 0.36202313 | 0.08470299 | 0 |
| 2021-11-24-07-24-CSLIB | C | Dry | 07 | 0.97194426 | 0.010522 | 0.100447 | 8.84863065 | 0.40455171 | 0.9701986  | 0.41697825 | 0.09465066 | 2 |
| 2021-11-29-13-54-CSLIB | C | Dry | 13 | 1.04972153 | 0.001466 | 0.10003  | 4.30222922 | 0.34196273 | 0.96899872 | 0.35290319 | 0.042253   | 1 |
| 2021-12-03-12-18-CSLIB | C | Dry | 12 | 0.9885849  | 0.128093 | 0.113799 | 3.70824687 | 0.38874354 | 0.98470234 | 0.39478279 | 0.39091413 | 0 |
| 2021-12-07-07-48-CSLIB | C | Dry | 07 | 0.96879798 | 0.181639 | 0.112183 | 15.8004902 | 0.39574246 | 0.98394197 | 0.40220101 | 0.47645429 | 3 |
| 2021-12-10-07-42-CSLIB | C | Dry | 07 | 1.01024395 | 0.312619 | 0.129518 | 11.3912597 | 0.49491994 | 0.97563024 | 0.50728229 | 0.16004925 | 3 |
| 2021-12-18-05-30-CSLIB | C | Dry | 05 | 1.05846548 | 0.238872 | 0.117968 | 15.5985989 | 0.43768469 | 0.97785059 | 0.44759874 | 0.23596183 | 5 |
| 2021-12-31-16-00-CSLIB | C | Dry | 16 | 1.0898058  | 0.134005 | 0.107815 | 10.6796572 | 0.48614745 | 0.98237355 | 0.49487026 | 0.39468144 | 0 |
| 2022-01-05-09-00-CSLIB | C | Dry | 09 | 1.02266949 | 0.307683 | 0.118404 | 6.46606442 | 0.46485619 | 0.978903   | 0.47487462 | 0.25137581 | 1 |
| 2022-01-06-07-48-CSLIB | C | Dry | 07 | 0.9982299  | 0.160231 | 0.110728 | 10.3810162 | 0.40078281 | 0.98493336 | 0.40691363 | 0.34299785 | 3 |
| 2022-01-08-15-36-CSLIB | C | Dry | 15 | 0.99840425 | 0.260972 | 0.114878 | 11.0399593 | 0.47990852 | 0.98419325 | 0.48761615 | 0.10241921 | 1 |
| 2022-01-13-17-18-CSLIB | C | Dry | 17 | 0.98247845 | 0.001024 | 0.100032 | 11.5350857 | 0.46433082 | 0.97761528 | 0.47496273 | 0.01485996 | 0 |
| 2022-01-14-16-00-CSLIB | C | Dry | 16 | 1.00859967 | 0.072253 | 0.102729 | 9.03497033 | 0.42746439 | 0.97909832 | 0.43658985 | 0.16743613 | 0 |
| 2022-01-15-11-24-CSLIB | C | Dry | 11 | 1.01101188 | 0.033748 | 0.1011   | 8.34317469 | 0.43283849 | 0.98334955 | 0.44016748 | 0.25767929 | 1 |
| 2022-01-17-18-12-CSLIB | C | Dry | 18 | 1.02306795 | 0.009307 | 0.100241 | 10.6700422 | 0.43571033 | 0.97489372 | 0.4469311  | 0.02329332 | 0 |
| 2022-01-18-11-54-CSLIB | C | Dry | 11 | 1.02693429 | 0.042772 | 0.101443 | 9.10478944 | 0.44130431 | 0.98047675 | 0.45009156 | 0.18403201 | 1 |
| 2022-01-18-17-42-CSLIB | C | Dry | 17 | 0.98509226 | 0.029043 | 0.100908 | 9.88333965 | 0.39674153 | 0.97748593 | 0.40587953 | 0.15684826 | 1 |
| 2022-01-21-08-42-CSLIB | C | Dry | 08 | 1.02254389 | 0.156339 | 0.108266 | 17.4952711 | 0.44087133 | 0.9843105  | 0.44789864 | 0.56377962 | 2 |
| 2022-01-24-07-30-CSLIB | C | Dry | 07 | 1.00054926 | 0.189151 | 0.109231 | 7.77874388 | 0.39488757 | 0.98306861 | 0.40168872 | 0.19273623 | 3 |
| 2022-01-25-08-36-CSLIB | C | Dry | 08 | 1.01973155 | 0.119689 | 0.10568  | 11.9542363 | 0.44407871 | 0.98587925 | 0.45043926 | 0.42674054 | 4 |
| 2022-01-25-14-00-CSLIB | C | Dry | 14 | 0.99918061 | 0.061422 | 0.102235 | 11.7126676 | 0.44216474 | 0.97673358 | 0.45269739 | 0.04731302 | 0 |
| 2022-01-28-13-00-CSLIB | C | Dry | 13 | 1.04050471 | 0.914759 | 0.200107 | 12.4191254 | 0.53994188 | 0.98573058 | 0.54775807 | 0.44348415 | 2 |
| 2022-01-28-16-00-CSLIB | C | Dry | 16 | 1.05388671 | 0.299907 | 0.117411 | 10.4657934 | 0.4390775  | 0.97679645 | 0.44950767 | 0.16792859 | 0 |
| 2022-01-29-10-48-CSLIB | C | Dry | 10 | 0.99321914 | 0.042916 | 0.101475 | 11.0509918 | 0.46050812 | 0.98424447 | 0.46787981 | 0.0440751  | 0 |

|                        |   |     |    |            |          |          |            |            |            |            |            |   |
|------------------------|---|-----|----|------------|----------|----------|------------|------------|------------|------------|------------|---|
| 2022-01-30-17-54-CSLIB | C | Dry | 17 | 1.02368573 | 0.188359 | 0.109295 | 10.2327775 | 0.37171367 | 0.97343405 | 0.38185809 | 0.02152047 | 0 |
| 2022-01-31-18-00-CSLIB | C | Dry | 18 | 0.9935575  | 0.213275 | 0.110931 | 11.993555  | 0.43611442 | 0.97742585 | 0.44618671 | 0.00083718 | 0 |
| 2022-01-31-18-06-CSLIB | C | Dry | 18 | 1.02762755 | 0.335394 | 0.120068 | 12.0288605 | 0.44283901 | 0.98222314 | 0.45085377 | 0.02039089 | 0 |

---

The filename of each *.wav* file based on the YYYY-MM-DD-HH-mm timestamp (WAV), Normalized Acoustic Complexity index (nACI), Acoustic Diversity index (ADI), Inverse Acoustic Evenness index (1-AEI), Bioacoustic index (BI), Acoustic Entropy index (H), Temporal Entropy Index (Ht), Spectral Entropy Index (Hf), Acoustic Richness Index (AR), and Number of species heard (SH).
