# Supplementary material for: Acoustic indices as proxies for bird species richness in an urban green space in Metro Manila
Source: PubMed Central journal article supplement (PMC10381043; doi:10.1371/journal.pone.0289001), 2023-07-28
Supplement: pone.0289001.s005.pdf [file pone.0289001.s005.pdf]

**S4 Table. The results of the acoustic index analysis for 840 pre-processed 5-min sound samples.**

| WAV                     | Site | Season | Hour | nACI       | ADI      | 1-AEI    | BI         | H          | Ht         | Hf         | AR         | SH |
|-------------------------|------|--------|------|------------|----------|----------|------------|------------|------------|------------|------------|----|
| 2021-05-02-08-18-IB100p | A    | Wet    | 08   | 1.02237803 | 2.266279 | 0.856061 | 3.48985376 | 0.87979972 | 0.98904646 | 0.88954337 | 0.6446281  | 3  |
| 2021-05-04-07-36-IB100p | A    | Wet    | 07   | 1.10139084 | 2.168751 | 0.730718 | 8.90222451 | 0.8012504  | 0.99056515 | 0.80888208 | 0.97727273 | 3  |
| 2021-05-09-13-00-IB100p | A    | Wet    | 13   | 1.01458471 | 2.29749  | 0.942925 | 3.68765324 | 0.89955445 | 0.98697276 | 0.91142783 | 0.12551653 | 2  |
| 2021-05-13-11-30-IB100p | A    | Wet    | 11   | 1.04320343 | 2.260886 | 0.836628 | 7.27840848 | 0.81032135 | 0.95518755 | 0.84833742 | 0.01497934 | 2  |
| 2021-06-20-10-24-IB100p | A    | Wet    | 10   | 1.00662254 | 2.289167 | 0.909525 | 7.01733302 | 0.84589823 | 0.98897171 | 0.85533107 | 0.57334711 | 4  |
| 2021-06-22-16-54-IB100p | A    | Wet    | 16   | 1.01007156 | 2.302157 | 0.983334 | 2.74269967 | 0.89752134 | 0.98982044 | 0.90675167 | 0.35123967 | 5  |
| 2021-07-13-13-54-IB100p | A    | Wet    | 13   | 1.07658431 | 2.188797 | 0.73421  | 2.98560456 | 0.84032701 | 0.98662824 | 0.85171596 | 0.43904959 | 4  |
| 2021-07-19-16-18-IB100p | A    | Wet    | 16   | 1.00821768 | 2.299646 | 0.956684 | 3.5549032  | 0.86230335 | 0.98927091 | 0.87165542 | 0.45196281 | 5  |
| 2021-08-01-09-30-IB100p | A    | Wet    | 09   | 1.0194158  | 1.915288 | 0.546272 | 2.14478842 | 0.86043949 | 0.96981645 | 0.8872189  | 0.04338843 | 5  |
| 2021-08-13-07-06-IB100p | A    | Wet    | 07   | 0.99827472 | 2.298938 | 0.953201 | 4.04218123 | 0.83350241 | 0.99105039 | 0.8410293  | 0.61363636 | 5  |
| 2021-08-13-12-06-IB100p | A    | Wet    | 12   | 1.02431246 | 2.298199 | 0.947295 | 2.82276166 | 0.88330991 | 0.98931116 | 0.89285347 | 0.14876033 | 3  |
| 2021-08-25-16-12-IB100p | A    | Wet    | 16   | 1.08851407 | 2.301882 | 0.978973 | 2.31375178 | 0.90273253 | 0.98905049 | 0.91272644 | 0.32386364 | 2  |
| 2021-09-13-13-18-IB100p | A    | Wet    | 13   | 1.01979476 | 1.682703 | 0.428761 | 4.48428757 | 0.86392603 | 0.96586428 | 0.89445903 | 0.01704546 | 3  |
| 2021-09-19-10-42-IB100p | A    | Wet    | 10   | 1.01167801 | 2.188243 | 0.733311 | 2.97183094 | 0.90767257 | 0.98826048 | 0.91845479 | 0.19473141 | 4  |
| 2021-09-27-08-42-IB100p | A    | Wet    | 08   | 1.07326613 | 2.267402 | 0.850465 | 1.81781316 | 0.90072555 | 0.97960815 | 0.91947535 | 0.15495868 | 5  |
| 2021-10-01-17-00-IB100p | A    | Wet    | 17   | 1.02152724 | 2.167251 | 0.775296 | 11.7436169 | 0.84965113 | 0.99041403 | 0.85787469 | 0.93285124 | 1  |
| 2021-10-05-10-48-IB100p | A    | Wet    | 10   | 1.06303157 | 2.301677 | 0.976964 | 2.92714859 | 0.87759293 | 0.98957623 | 0.88683712 | 0.68698347 | 3  |
| 2021-10-12-15-06-IB100p | A    | Wet    | 15   | 1.07292474 | 2.292136 | 0.918421 | 1.54566819 | 0.88868953 | 0.9900878  | 0.89758659 | 0.59297521 | 4  |
| 2021-10-30-15-48-IB100p | A    | Wet    | 15   | 1.0197854  | 2.166154 | 0.717471 | 3.49040172 | 0.88576426 | 0.98405735 | 0.90011447 | 0.04532541 | 1  |
| 2020-10-08-18-00-IB100p | A    | Wet    | 18   | 1.07698141 | 1.430809 | 0.329339 | 8.4646084  | 0.74300358 | 0.92770902 | 0.80090154 | 0.00063776 | 0  |
| 2020-10-25-06-06-IB100p | A    | Wet    | 06   | 1.20320986 | 2.239123 | 0.7996   | 7.12057002 | 0.87359285 | 0.98551936 | 0.8864289  | 0.33928571 | 3  |
| 2020-11-01-12-12-IB100p | A    | Dry    | 12   | 1.15486846 | 2.275072 | 0.876875 | 8.83828056 | 0.90082238 | 0.9815911  | 0.91771654 | 0.34151786 | 2  |
| 2020-11-05-09-06-IB100p | A    | Dry    | 09   | 1.028816   | 1.791079 | 0.4601   | 9.41261762 | 0.82039044 | 0.98493733 | 0.8329367  | 0.38966837 | 2  |
| 2020-11-07-09-30-IB100p | A    | Dry    | 09   | 1.02324355 | 2.262559 | 0.843686 | 9.45972835 | 0.84028716 | 0.98752502 | 0.85090214 | 0.17346939 | 1  |
| 2020-11-25-17-30-IB100p | A    | Dry    | 17   | 1.02086403 | 2.299603 | 0.956967 | 7.64908226 | 0.82063714 | 0.98996437 | 0.82895625 | 0.28125    | 1  |

|                         |   |     |    |            |          |          |            |            |            |            |            |   |
|-------------------------|---|-----|----|------------|----------|----------|------------|------------|------------|------------|------------|---|
| 2020-11-26-10-48-IB100p | A | Dry | 10 | 1.02912646 | 1.162802 | 0.292701 | 6.97178675 | 0.73706834 | 0.96922237 | 0.76047392 | 0.12627551 | 2 |
| 2020-12-10-05-42-IB100p | A | Dry | 05 | 1.15020245 | 1.712065 | 0.484552 | 8.6876979  | 0.81001924 | 0.97745617 | 0.82870134 | 0.29846939 | 2 |
| 2020-12-11-08-30-IB100p | A | Dry | 08 | 1.03186261 | 1.227811 | 0.27449  | 5.38704755 | 0.75205693 | 0.98829302 | 0.76096553 | 0.56122449 | 7 |
| 2020-12-28-05-54-IB100p | A | Dry | 05 | 1.05838919 | 0.853577 | 0.21268  | 4.92178368 | 0.73324349 | 0.9847006  | 0.74463598 | 0.29846939 | 2 |
| 2020-12-29-12-00-IB100p | A | Dry | 12 | 1.01538838 | 2.277987 | 0.875479 | 3.67866383 | 0.84058454 | 0.99097399 | 0.84824077 | 0.06760204 | 2 |
| 2020-12-31-16-12-IB100p | A | Dry | 16 | 1.02909226 | 2.002037 | 0.590152 | 2.76292909 | 0.85898891 | 0.96663066 | 0.88864231 | 0.04081633 | 2 |
| 2021-01-01-08-12-IB100p | A | Dry | 08 | 1.01424551 | 1.299354 | 0.290169 | 5.71852182 | 0.71412722 | 0.99126469 | 0.72042032 | 0.64891582 | 5 |
| 2021-01-05-11-00-IB100p | A | Dry | 11 | 1.01729963 | 2.298088 | 0.946298 | 2.45241774 | 0.86506818 | 0.99075428 | 0.873141   | 0.01658163 | 2 |
| 2021-01-12-09-12-IB100p | A | Dry | 09 | 1.01286657 | 2.201514 | 0.752265 | 8.46245235 | 0.81019086 | 0.9463747  | 0.85609945 | 0.00765306 | 4 |
| 2021-01-14-08-36-IB100p | A | Dry | 08 | 1.0730248  | 1.743623 | 0.439386 | 3.66140825 | 0.79370559 | 0.96860059 | 0.81943538 | 0.15943878 | 4 |
| 2021-01-16-07-54-IB100p | A | Dry | 07 | 1.03670324 | 1.586931 | 0.381778 | 6.02744007 | 0.73560113 | 0.99004703 | 0.74299615 | 0.65369898 | 4 |
| 2021-01-18-14-42-IB100p | A | Dry | 14 | 1.02424891 | 2.113743 | 0.659236 | 3.68127795 | 0.84866972 | 0.98351042 | 0.86289855 | 0.14030612 | 1 |
| 2021-01-19-05-42-IB100p | A | Dry | 05 | 1.02895441 | 1.906446 | 0.556196 | 9.21209745 | 0.70967972 | 0.9903522  | 0.71659327 | 0.78061225 | 0 |
| 2021-01-27-14-54-IB100p | A | Dry | 14 | 1.01644569 | 2.228132 | 0.795812 | 9.35438957 | 0.87554437 | 0.98648092 | 0.88754313 | 0.22193878 | 1 |
| 2021-02-04-06-06-IB100p | A | Dry | 06 | 1.03160902 | 1.529512 | 0.362535 | 8.19178742 | 0.7254876  | 0.9891321  | 0.73345875 | 0.5625     | 3 |
| 2021-02-05-11-00-IB100p | A | Dry | 11 | 1.04619441 | 1.801561 | 0.518055 | 7.56579998 | 0.79714937 | 0.98393252 | 0.8101667  | 0.24936225 | 3 |
| 2021-02-15-09-00-IB100p | A | Dry | 09 | 1.02207094 | 2.16491  | 0.705248 | 6.66240967 | 0.82000724 | 0.98921812 | 0.82894482 | 0.14030612 | 4 |
| 2021-02-19-12-00-IB100p | A | Dry | 12 | 1.07114248 | 2.268314 | 0.855637 | 5.32589379 | 0.8997419  | 0.97632584 | 0.92155904 | 0.12468112 | 3 |
| 2021-03-05-18-12-IB100p | A | Dry | 18 | 1.04144067 | 1.559553 | 0.365298 | 9.08332579 | 0.77719843 | 0.97557133 | 0.79665977 | 0.25       | 1 |
| 2021-03-11-14-00-IB100p | A | Dry | 14 | 1.04150527 | 2.254225 | 0.83819  | 9.0816277  | 0.8900962  | 0.98794767 | 0.9009548  | 0.49744898 | 2 |
| 2021-03-16-18-30-IB100p | A | Dry | 18 | 1.02320081 | 1.175888 | 0.264419 | 6.48354694 | 0.82218504 | 0.98926314 | 0.83110853 | 0.15784439 | 0 |
| 2021-03-29-17-36-IB100p | A | Dry | 17 | 1.17090768 | 2.183185 | 0.727962 | 6.77293502 | 0.85704615 | 0.96655868 | 0.88669852 | 0.05580357 | 2 |
| 2021-04-03-16-06-IB100p | A | Dry | 16 | 1.03815852 | 2.20948  | 0.757468 | 3.66961282 | 0.8202431  | 0.9367898  | 0.87558927 | 0.00318878 | 3 |
| 2021-04-04-18-54-IB100p | A | Dry | 18 | 1.06791947 | 1.444732 | 0.336212 | 10.8279635 | 0.76356739 | 0.95614575 | 0.79858891 | 0.08609694 | 0 |
| 2021-04-22-15-42-IB100p | A | Dry | 15 | 1.03607017 | 1.794436 | 0.462613 | 7.07162804 | 0.78450956 | 0.96688267 | 0.81138032 | 0.10044643 | 4 |
| 2021-04-27-13-48-IB100p | A | Dry | 13 | 1.14561346 | 2.103239 | 0.66567  | 9.32871464 | 0.86743384 | 0.97756209 | 0.88734399 | 0.0908801  | 2 |
| 2021-05-07-06-12-IB100p | A | Wet | 06 | 1.10555664 | 1.855234 | 0.523851 | 11.0785184 | 0.78420889 | 0.97034498 | 0.80817534 | 0.22799745 | 5 |
| 2021-05-21-17-30-IB100p | A | Wet | 17 | 1.01580892 | 1.329709 | 0.304891 | 7.8026353  | 0.78775368 | 0.95574718 | 0.8242281  | 0.02072704 | 3 |

|                         |   |     |    |            |          |          |            |            |            |            |            |   |
|-------------------------|---|-----|----|------------|----------|----------|------------|------------|------------|------------|------------|---|
| 2021-05-23-15-48-IB100p | A | Wet | 15 | 1.03500442 | 2.275388 | 0.878022 | 10.5602937 | 0.816226   | 0.98942644 | 0.82494864 | 0.65816327 | 2 |
| 2021-06-01-10-24-IB100p | A | Wet | 10 | 1.02717869 | 2.117256 | 0.666255 | 6.03967458 | 0.87738168 | 0.96948533 | 0.90499737 | 0.20280612 | 2 |
| 2021-06-29-11-42-IB100p | A | Wet | 11 | 1.01224551 | 2.106696 | 0.650197 | 6.75676701 | 0.78509891 | 0.98926441 | 0.79361887 | 0.38137755 | 3 |
| 2021-07-08-15-36-IB100p | A | Wet | 15 | 1.03914664 | 1.721844 | 0.441879 | 5.73355608 | 0.86753863 | 0.98105721 | 0.88428954 | 0.07653061 | 1 |
| 2021-07-13-17-00-IB100p | A | Wet | 17 | 1.05704608 | 2.258427 | 0.854479 | 14.4752313 | 0.84032977 | 0.971952   | 0.8645795  | 0.25       | 5 |
| 2021-07-15-18-54-IB100p | A | Wet | 18 | 1.02013426 | 2.00188  | 0.580112 | 8.44250008 | 0.80709556 | 0.98878012 | 0.81625383 | 0.18303571 | 0 |
| 2021-08-04-07-12-IB100p | A | Wet | 07 | 1.02038333 | 2.26701  | 0.889177 | 4.0624612  | 0.89124173 | 0.984704   | 0.90508593 | 0.43048469 | 2 |
| 2021-08-05-05-00-IB100p | A | Wet | 05 | 1.0104704  | 2.284054 | 0.896076 | 5.46542277 | 0.78464357 | 0.99136335 | 0.7914793  | 0.375      | 2 |
| 2021-08-16-11-54-IB100p | A | Wet | 11 | 1.05514734 | 1.940849 | 0.587831 | 5.37308553 | 0.83103507 | 0.94970333 | 0.87504703 | 0.00892857 | 6 |
| 2021-08-18-06-48-IB100p | A | Wet | 06 | 1.00177051 | 1.921101 | 0.525507 | 6.56150402 | 0.74607725 | 0.99107767 | 0.75279393 | 0.79209184 | 7 |
| 2021-08-27-12-18-IB100p | A | Wet | 12 | 1.01044784 | 1.196517 | 0.279773 | 7.38911001 | 0.83433002 | 0.97357132 | 0.85697884 | 0.01434949 | 3 |
| 2021-09-06-14-42-IB100p | A | Wet | 14 | 1.08468506 | 2.290957 | 0.916706 | 7.22537341 | 0.89952734 | 0.98684689 | 0.91151661 | 0.08609694 | 3 |
| 2021-09-13-05-30-IB100p | A | Wet | 05 | 1.01755998 | 2.142112 | 0.710815 | 9.11819143 | 0.84928938 | 0.98685856 | 0.86059889 | 0.18781888 | 4 |
| 2021-09-16-07-48-IB100p | A | Wet | 07 | 1.00669198 | 1.6273   | 0.419533 | 3.99815733 | 0.79945545 | 0.98521014 | 0.81145678 | 0.18941327 | 4 |
| 2021-09-26-13-42-IB100p | A | Wet | 13 | 1.01467957 | 2.298344 | 0.947932 | 6.80700119 | 0.89359852 | 0.989279   | 0.90328261 | 0.08992347 | 2 |
| 2021-10-18-14-06-IB100p | A | Wet | 14 | 1.01779542 | 1.21001  | 0.25767  | 4.94239035 | 0.7494657  | 0.98916273 | 0.75767685 | 0.45248725 | 2 |
| 2021-10-22-06-54-IB100p | A | Wet | 06 | 1.0186682  | 1.279281 | 0.275279 | 7.90424153 | 0.76955714 | 0.9877364  | 0.77911186 | 0.33394452 | 3 |
| 2020-09-11-09-54-IB100p | A | Wet | 09 | 1.00976493 | 2.302584 | 0.999172 | 2.91044967 | 0.94747208 | 0.99139824 | 0.95569272 | 0.0208239  | 0 |
| 2020-11-02-10-18-IB100p | A | Dry | 10 | 1.02777122 | 2.30027  | 0.962308 | 1.91851153 | 0.9050639  | 0.98749706 | 0.91652314 | 0.01539158 | 5 |
| 2020-11-06-17-00-IB100p | A | Dry | 17 | 1.01859321 | 1.129939 | 0.25964  | 3.58787158 | 0.85966557 | 0.98205371 | 0.87537531 | 0.04074242 | 1 |
| 2020-11-16-10-00-IB100p | A | Dry | 10 | 1.02418527 | 2.288017 | 0.904128 | 2.78903838 | 0.88491858 | 0.98812702 | 0.89555145 | 0.03440471 | 3 |
| 2020-11-25-15-12-IB100p | A | Dry | 15 | 1.0249477  | 2.286433 | 0.898675 | 3.31533244 | 0.83491663 | 0.98995512 | 0.84338837 | 0.18469896 | 0 |
| 2020-12-04-07-48-IB100p | A | Dry | 07 | 1.01910516 | 1.302181 | 0.296038 | 4.35683718 | 0.80699105 | 0.98768437 | 0.81705358 | 0.11407877 | 5 |
| 2021-01-12-17-30-IB100p | A | Dry | 17 | 1.0126954  | 2.301174 | 0.97041  | 2.64726799 | 0.82257629 | 0.99128334 | 0.82980945 | 0.55771843 | 2 |
| 2021-02-16-09-18-IB100p | A | Dry | 09 | 1.02187064 | 2.20314  | 0.754305 | 2.36840986 | 0.87773754 | 0.98632864 | 0.88990374 | 0.06337709 | 7 |
| 2021-03-04-12-00-IB100p | A | Dry | 12 | 1.02704284 | 1.610904 | 0.396422 | 2.32152258 | 0.86882337 | 0.98400279 | 0.88294807 | 0.04481666 | 3 |
| 2021-03-10-12-30-IB100p | A | Dry | 12 | 1.04663415 | 1.883462 | 0.515111 | 4.61444113 | 0.85604535 | 0.96821163 | 0.88415108 | 0.00995926 | 0 |
| 2021-03-15-07-24-IB100p | A | Dry | 07 | 1.02501912 | 2.127925 | 0.671596 | 6.66527576 | 0.80378113 | 0.98738398 | 0.81405121 | 0.24626528 | 4 |

|                         |   |     |    |            |          |          |            |            |            |            |            |   |
|-------------------------|---|-----|----|------------|----------|----------|------------|------------|------------|------------|------------|---|
| 2021-03-26-05-00-IB100p | A | Dry | 05 | 1.03615784 | 2.20827  | 0.784267 | 10.1317216 | 0.76533786 | 0.9912854  | 0.77206611 | 0.59076505 | 2 |
| 2021-04-16-05-30-IB100p | A | Dry | 05 | 1.05151693 | 2.287331 | 0.902903 | 7.62962675 | 0.85493263 | 0.99015247 | 0.86343533 | 0.29425079 | 6 |
| 2021-05-15-12-18-IB100p | A | Wet | 12 | 1.00159077 | 2.299011 | 0.953406 | 4.58043168 | 0.87901481 | 0.9900273  | 0.88786926 | 0.20371209 | 3 |
| 2021-05-18-08-00-IB100p | A | Wet | 08 | 1.04928932 | 2.256393 | 0.833699 | 8.53460429 | 0.83464753 | 0.98445618 | 0.84782598 | 0.21729289 | 0 |
| 2021-05-27-16-12-IB100p | A | Wet | 16 | 1.02581301 | 2.104248 | 0.657234 | 4.75137732 | 0.83976589 | 0.98634879 | 0.85138838 | 0.15617927 | 3 |
| 2021-06-08-14-18-IB100p | A | Wet | 14 | 1.03060306 | 2.302585 | 0.99954  | 1.52176957 | 0.96077808 | 0.99443052 | 0.96615908 | 1          | 0 |
| 2021-06-09-14-42-IB100p | A | Wet | 14 | 1.00683394 | 2.301777 | 0.977066 | 2.24891557 | 0.8689038  | 0.99024732 | 0.8774614  | 0.30421005 | 2 |
| 2021-06-11-14-36-IB100p | A | Wet | 14 | 1.00228424 | 2.286693 | 0.899411 | 3.37831006 | 0.86717508 | 0.9906904  | 0.87532399 | 0.31824355 | 4 |
| 2021-06-15-16-18-IB100p | A | Wet | 16 | 1.01826535 | 2.229249 | 0.797813 | 4.9605024  | 0.88153873 | 0.98914039 | 0.89121701 | 0.19013128 | 2 |
| 2021-06-22-08-54-IB100p | A | Wet | 08 | 1.00321871 | 2.298644 | 0.949767 | 5.24719606 | 0.87884262 | 0.99019016 | 0.88754934 | 0.33001358 | 4 |
| 2021-06-28-06-18-IB100p | A | Wet | 06 | 1.01096454 | 2.281524 | 0.892953 | 7.40975413 | 0.82407794 | 0.98296789 | 0.83835692 | 0.14938886 | 4 |
| 2021-07-10-06-18-IB100p | A | Wet | 06 | 1.00592349 | 2.21837  | 0.785542 | 9.21686212 | 0.80669095 | 0.98295173 | 0.82068217 | 0.1466727  | 4 |
| 2021-07-27-11-36-IB100p | A | Wet | 11 | 1.06459802 | 2.264248 | 0.844115 | 3.03579235 | 0.86194299 | 0.98280427 | 0.87702405 | 0.12041648 | 2 |
| 2021-08-05-13-48-IB100p | A | Wet | 13 | 1.03121957 | 2.30199  | 0.980632 | 5.01214055 | 0.91366273 | 0.9905291  | 0.92239867 | 0.63558171 | 0 |
| 2021-09-13-06-54-IB100p | A | Wet | 06 | 1.00368743 | 2.29211  | 0.919413 | 3.98426085 | 0.88528053 | 0.99082918 | 0.89347443 | 0.22951562 | 5 |
| 2021-10-15-18-12-IB100p | A | Wet | 18 | 1.09632718 | 2.301373 | 0.975059 | 6.40051746 | 0.83047033 | 0.98864062 | 0.84001235 | 0.31688547 | 0 |
| 2021-10-19-18-06-IB100p | A | Wet | 18 | 1.01583677 | 1.392805 | 0.305822 | 7.04497616 | 0.82946797 | 0.9812845  | 0.84528796 | 0.04753282 | 1 |
| 2021-10-29-13-18-IB100p | A | Wet | 13 | 1.01542092 | 2.300632 | 0.964853 | 3.16423616 | 0.79485675 | 0.99120094 | 0.80191283 | 0.58397465 | 0 |
| 2022-01-04-15-00-IB100p | A | Dry | 15 | 1.02059632 | 2.302367 | 0.989057 | 2.20796877 | 0.89191059 | 0.9895462  | 0.90133294 | 0.11453146 | 1 |
| 2022-01-05-18-54-IB100p | A | Dry | 18 | 1.03230846 | 2.295866 | 0.9416   | 9.46246302 | 0.80974293 | 0.99036908 | 0.81761734 | 0.42009959 | 0 |
| 2022-01-15-08-18-IB100p | A | Dry | 08 | 1.02981771 | 2.188    | 0.739863 | 2.91962798 | 0.89541746 | 0.98020033 | 0.91350455 | 0.02172929 | 3 |
| 2022-01-29-13-54-IB100p | A | Dry | 13 | 1.0204694  | 2.297279 | 0.943133 | 3.05472175 | 0.88439112 | 0.98941544 | 0.89385215 | 0.02987777 | 5 |
| 2022-01-31-11-00-IB100p | A | Dry | 11 | 1.01708827 | 2.302299 | 0.986556 | 2.21114334 | 0.88332575 | 0.99092541 | 0.89141498 | 0.11407877 | 6 |
| 2021-07-28-12-36-IB100p | A | Wet | 12 | 1.07933006 | 2.284758 | 0.899529 | 3.34171676 | 0.88360187 | 0.986572   | 0.89562837 | 0.25       | 1 |
| 2021-08-08-14-30-IB100p | A | Wet | 14 | 1.03079013 | 1.745635 | 0.464805 | 1.87102314 | 0.79254972 | 0.94264248 | 0.84077446 | 0.015625   | 1 |
| 2021-08-19-18-00-IB100p | A | Wet | 18 | 1.00831719 | 2.302483 | 0.992307 | 3.32035729 | 0.8415854  | 0.99037164 | 0.84976727 | 0.38671875 | 1 |
| 2020-10-02-10-18-IB100p | A | Wet | 10 | 1.01098552 | 2.302584 | 0.999172 | 2.96941298 | 0.94794798 | 0.99135268 | 0.95621669 | 0.02379536 | 0 |
| 2020-10-04-11-06-IB100p | A | Wet | 11 | 1.05701365 | 2.207564 | 0.761226 | 8.64953061 | 0.86371512 | 0.96904961 | 0.89130124 | 0.00535396 | 5 |

|                         |   |     |    |            |          |          |            |            |            |            |            |   |
|-------------------------|---|-----|----|------------|----------|----------|------------|------------|------------|------------|------------|---|
| 2020-11-06-10-48-IB100p | A | Dry | 10 | 1.0956883  | 2.1508   | 0.704352 | 1.6723254  | 0.85815042 | 0.98991319 | 0.86689462 | 0.35574063 | 1 |
| 2020-11-27-05-06-IB100p | A | Dry | 05 | 1.08268447 | 2.202463 | 0.766886 | 6.49815198 | 0.76660762 | 0.98191074 | 0.78073045 | 0.17132659 | 0 |
| 2021-01-01-05-12-IB100p | A | Dry | 05 | 1.02122913 | 2.021804 | 0.618516 | 9.9026624  | 0.77900374 | 0.99080629 | 0.78623213 | 0.2082094  | 1 |
| 2021-01-28-06-30-IB100p | A | Dry | 06 | 1.02605386 | 2.245567 | 0.810518 | 3.4699669  | 0.78672952 | 0.99116381 | 0.79374319 | 0.6728138  | 2 |
| 2021-02-05-07-00-IB100p | A | Dry | 07 | 1.03033225 | 2.247134 | 0.815039 | 3.7993727  | 0.8478996  | 0.99001026 | 0.85645536 | 0.14455681 | 6 |
| 2021-02-05-08-30-IB100p | A | Dry | 08 | 1.14675593 | 1.889286 | 0.536219 | 3.5015967  | 0.871708   | 0.9743098  | 0.89469284 | 0.1189768  | 3 |
| 2021-02-15-08-54-IB100p | A | Dry | 08 | 1.01757264 | 2.26693  | 0.850808 | 2.08729173 | 0.87076209 | 0.98926269 | 0.88021321 | 0.10469958 | 4 |
| 2021-02-16-13-24-IB100p | A | Dry | 13 | 1.03592654 | 1.454888 | 0.343688 | 3.69184831 | 0.79410936 | 0.93455472 | 0.84971949 | 0.0035693  | 3 |
| 2021-02-20-15-54-IB100p | A | Dry | 15 | 1.0481144  | 1.701082 | 0.418061 | 3.63990348 | 0.86513901 | 0.96887549 | 0.89293105 | 0.00594884 | 3 |
| 2021-02-22-17-12-IB100p | A | Dry | 17 | 1.04623693 | 2.302344 | 0.987637 | 2.02445237 | 0.86183478 | 0.9906213  | 0.8699942  | 0.4907793  | 2 |
| 2021-03-09-11-06-IB100p | A | Dry | 11 | 1.01853495 | 2.258544 | 0.832778 | 2.6679854  | 0.85464098 | 0.99044311 | 0.86288751 | 0.40571089 | 2 |
| 2021-03-17-16-12-IB100p | A | Dry | 16 | 1.01065332 | 1.530447 | 0.353615 | 2.67579126 | 0.87533628 | 0.98364678 | 0.88988883 | 0.0333135  | 4 |
| 2021-03-19-11-24-IB100p | A | Dry | 11 | 1.02732506 | 2.301882 | 0.979073 | 3.19695637 | 0.87002079 | 0.99103432 | 0.87789169 | 0.66032124 | 4 |
| 2021-04-04-16-00-IB100p | A | Dry | 16 | 1.03514357 | 2.302555 | 0.996129 | 2.40662217 | 0.93487141 | 0.98479412 | 0.94930645 | 0.24092802 | 2 |
| 2021-04-07-09-24-IB100p | A | Dry | 09 | 1.0156019  | 2.301703 | 0.97667  | 2.07561986 | 0.88928373 | 0.9893609  | 0.89884665 | 0.09577632 | 5 |
| 2021-05-13-13-36-IB100p | A | Wet | 13 | 1.00726908 | 2.257078 | 0.832645 | 5.50522927 | 0.86107363 | 0.99009847 | 0.86968484 | 0.51635931 | 4 |
| 2021-05-25-18-54-IB100p | A | Wet | 18 | 1.06248749 | 2.301982 | 0.981365 | 6.61424778 | 0.8773429  | 0.98828553 | 0.88774233 | 0.13087448 | 0 |
| 2021-06-19-16-42-IB100p | A | Wet | 16 | 1.00739593 | 2.275888 | 0.871532 | 3.35152458 | 0.89513435 | 0.98804866 | 0.90596181 | 0.12849494 | 2 |
| 2021-06-22-15-48-IB100p | A | Wet | 15 | 0.99391874 | 2.273057 | 0.865399 | 4.5139287  | 0.8773352  | 0.9881943  | 0.8878165  | 0.38429506 | 4 |
| 2021-06-25-09-00-IB100p | A | Wet | 09 | 1.09678555 | 2.278941 | 0.88264  | 11.3152415 | 0.81298835 | 0.99049494 | 0.82079001 | 0.78048781 | 4 |
| 2021-06-26-07-42-IB100p | A | Wet | 07 | 1.09185815 | 2.301796 | 0.978587 | 7.18118849 | 0.84634887 | 0.99032844 | 0.85461432 | 0.69601428 | 2 |
| 2021-07-15-17-18-IB100p | A | Wet | 17 | 1.01550901 | 2.289741 | 0.921612 | 12.1549067 | 0.83712625 | 0.97995679 | 0.85424812 | 0.22903034 | 2 |
| 2021-08-28-05-24-IB100p | A | Wet | 05 | 1.00967581 | 2.29433  | 0.935342 | 8.02784061 | 0.81682664 | 0.98906956 | 0.82585358 | 0.41225461 | 1 |
| 2021-08-28-07-18-IB100p | A | Wet | 07 | 1.02150259 | 2.087803 | 0.640815 | 7.39480634 | 0.85530036 | 0.98211668 | 0.87087449 | 0.20107079 | 4 |
| 2021-08-28-12-30-IB100p | A | Wet | 12 | 1.0393064  | 2.302564 | 0.997317 | 2.27582021 | 0.91046293 | 0.98603611 | 0.92335657 | 0.34265318 | 1 |
| 2021-11-01-14-30-IB100p | A | Dry | 14 | 1.02175649 | 2.299324 | 0.955754 | 2.68920925 | 0.86104741 | 0.99097647 | 0.86888784 | 0.40690065 | 0 |
| 2021-11-03-15-54-IB100p | A | Dry | 15 | 1.01065539 | 2.300133 | 0.961056 | 3.20831131 | 0.82816885 | 0.99152362 | 0.83524874 | 0.78048781 | 0 |
| 2021-11-08-17-48-IB100p | A | Dry | 17 | 1.03671217 | 2.294394 | 0.931956 | 3.84111719 | 0.84636188 | 0.98762768 | 0.85696452 | 0.28316478 | 0 |

|                         |   |     |    |            |          |          |            |            |            |            |            |   |
|-------------------------|---|-----|----|------------|----------|----------|------------|------------|------------|------------|------------|---|
| 2021-12-26-10-18-IB100p | A | Dry | 10 | 1.01979368 | 2.299393 | 0.954509 | 4.02798004 | 0.89549179 | 0.98940642 | 0.90507983 | 0.02855443 | 4 |
| 2022-01-16-06-42-IB100p | A | Dry | 06 | 1.0068233  | 2.294752 | 0.92919  | 4.91948091 | 0.82613865 | 0.99105543 | 0.8335948  | 0.47471743 | 3 |
| 2022-01-30-09-48-IB100p | A | Dry | 09 | 1.01494438 | 1.845916 | 0.486454 | 4.11475554 | 0.83140335 | 0.96909208 | 0.85791988 | 0.05993456 | 5 |
| 2020-11-01-05-24-IB100p | A | Dry | 05 | 1.01816666 | 0.665827 | 0.165217 | 5.32549757 | 0.81944013 | 0.97894121 | 0.83706776 | 0.01712247 | 0 |
| 2020-11-01-16-42-IB100p | A | Dry | 16 | 1.07707113 | 2.27873  | 0.880089 | 2.49266576 | 0.88504023 | 0.97339591 | 0.90922945 | 0.10273484 | 0 |
| 2020-11-02-11-12-IB100p | A | Dry | 11 | 1.02367643 | 2.302338 | 0.987588 | 2.62271221 | 0.91697844 | 0.9900659  | 0.92617919 | 0.01469679 | 3 |
| 2020-11-06-12-12-IB100p | A | Dry | 12 | 1.02158407 | 1.74392  | 0.435261 | 2.22771737 | 0.85565487 | 0.98288451 | 0.87055484 | 0.05707491 | 2 |
| 2020-11-10-12-18-IB100p | A | Dry | 12 | 1.01649548 | 2.302461 | 0.991096 | 2.23618343 | 0.9089584  | 0.99095118 | 0.91725851 | 0.03709869 | 2 |
| 2020-11-14-08-00-IB100p | A | Dry | 08 | 1.03697692 | 2.266093 | 0.862008 | 3.87649954 | 0.87684638 | 0.98231721 | 0.89263058 | 0.10573127 | 5 |
| 2020-11-14-10-00-IB100p | A | Dry | 10 | 1.03462644 | 2.294287 | 0.931348 | 1.71225995 | 0.87459309 | 0.98601701 | 0.88699595 | 0.14387634 | 3 |
| 2020-11-16-08-00-IB100p | A | Dry | 08 | 1.02212575 | 2.038559 | 0.599151 | 3.52035231 | 0.88172189 | 0.98130527 | 0.89851947 | 0.05160523 | 3 |
| 2020-11-19-07-00-IB100p | A | Dry | 07 | 1.0420083  | 1.570366 | 0.369091 | 4.09703152 | 0.82676967 | 0.9510619  | 0.86931216 | 0.0019025  | 4 |
| 2020-11-21-11-42-IB100p | A | Dry | 11 | 1.01703382 | 2.301737 | 0.978082 | 1.50105251 | 0.86479391 | 0.99021918 | 0.87333586 | 0.11985731 | 1 |
| 2020-11-21-13-12-IB100p | A | Dry | 13 | 1.02108915 | 1.866151 | 0.497632 | 1.84957613 | 0.84039916 | 0.96872288 | 0.8675331  | 0.01065398 | 1 |
| 2020-11-21-18-36-IB100p | A | Dry | 18 | 1.10560018 | 2.23842  | 0.823715 | 9.9410202  | 0.82265038 | 0.98588276 | 0.83443023 | 0.159239   | 0 |
| 2020-11-26-16-24-IB100p | A | Dry | 16 | 1.01991004 | 0.699476 | 0.166605 | 2.81996637 | 0.81311283 | 0.96988393 | 0.83836097 | 0.05174792 | 1 |
| 2020-11-30-15-24-IB100p | A | Dry | 15 | 1.01659337 | 2.301042 | 0.969205 | 1.33731284 | 0.8950645  | 0.98891529 | 0.90509724 | 0.13902497 | 1 |
| 2020-12-01-08-00-IB100p | A | Dry | 08 | 1.04469163 | 1.676536 | 0.440223 | 2.1921969  | 0.83500294 | 0.96383617 | 0.86633286 | 0.03376932 | 3 |
| 2020-12-02-11-00-IB100p | A | Dry | 11 | 1.02930319 | 1.73653  | 0.433292 | 2.27659115 | 0.8437858  | 0.9872453  | 0.85468708 | 0.15334126 | 1 |
| 2020-12-04-13-42-IB100p | A | Dry | 13 | 1.01522691 | 0.371889 | 0.124603 | 1.94813349 | 0.84257826 | 0.97936344 | 0.86033257 | 0.06340071 | 1 |
| 2020-12-07-10-30-IB100p | A | Dry | 10 | 1.1208244  | 2.301159 | 0.969776 | 1.84741459 | 0.87979829 | 0.9899352  | 0.88874332 | 0.38049941 | 0 |
| 2020-12-07-12-42-IB100p | A | Dry | 12 | 1.04421919 | 2.301568 | 0.975241 | 0.99656017 | 0.91169224 | 0.9879728  | 0.92279084 | 0.02197384 | 1 |
| 2020-12-09-15-06-IB100p | A | Dry | 15 | 1.11629806 | 2.295182 | 0.933939 | 1.93658321 | 0.90182193 | 0.980995   | 0.91929309 | 0.16480381 | 0 |
| 2020-12-18-15-24-IB100p | A | Dry | 15 | 1.02022983 | 0.977046 | 0.208487 | 2.4605363  | 0.79632603 | 0.94169341 | 0.84563195 | 0.00185494 | 2 |
| 2020-12-18-16-54-IB100p | A | Dry | 16 | 1.03738554 | 2.30241  | 0.989574 | 2.06186029 | 0.91002476 | 0.98157106 | 0.92711042 | 0.07229489 | 1 |
| 2020-12-22-07-30-IB100p | A | Dry | 07 | 1.05092701 | 1.866623 | 0.527075 | 3.56552951 | 0.85903314 | 0.96864863 | 0.88683668 | 0.04494649 | 5 |
| 2020-12-25-12-48-IB100p | A | Dry | 12 | 1.01855382 | 2.301906 | 0.980178 | 2.19217007 | 0.90389141 | 0.99054444 | 0.91251979 | 0.09136742 | 2 |
| 2020-12-26-09-42-IB100p | A | Dry | 09 | 1.03441234 | 2.30221  | 0.98469  | 2.06873159 | 0.91217106 | 0.98820082 | 0.92306245 | 0.03662307 | 3 |

|                         |   |     |    |            |          |          |            |            |            |            |            |   |
|-------------------------|---|-----|----|------------|----------|----------|------------|------------|------------|------------|------------|---|
| 2020-12-26-18-06-IB100p | A | Dry | 18 | 1.0581605  | 2.302549 | 0.995615 | 2.58511743 | 0.87761968 | 0.99042213 | 0.88610669 | 0.26439952 | 0 |
| 2021-01-27-07-18-IB100p | A | Dry | 07 | 1.02490111 | 1.98944  | 0.575046 | 2.53152645 | 0.85240065 | 0.98945568 | 0.86148442 | 0.37222354 | 4 |
| 2021-02-07-14-00-IB100p | A | Dry | 14 | 1.02396552 | 2.3012   | 0.970653 | 1.89149046 | 0.88398747 | 0.98995494 | 0.89295728 | 0.13931035 | 2 |
| 2021-02-11-08-00-IB100p | A | Dry | 08 | 1.07373686 | 2.101644 | 0.648436 | 4.08760524 | 0.84560943 | 0.98645281 | 0.85722239 | 0.22373365 | 3 |
| 2021-02-12-09-18-IB100p | A | Dry | 09 | 1.02300103 | 2.297621 | 0.945252 | 1.76675953 | 0.90292975 | 0.98833964 | 0.91358244 | 0.00694411 | 3 |
| 2021-02-12-12-30-IB100p | A | Dry | 12 | 1.02142167 | 2.289723 | 0.920691 | 2.55311959 | 0.92927203 | 0.98683546 | 0.94166866 | 0.00285375 | 7 |
| 2021-02-13-09-54-IB100p | A | Dry | 09 | 1.14151528 | 2.294874 | 0.933149 | 1.7529355  | 0.91002413 | 0.97482064 | 0.93352981 | 0.11533888 | 2 |
| 2021-02-15-14-36-IB100p | A | Dry | 14 | 1.00740961 | 2.302087 | 0.982265 | 5.34282105 | 0.89649069 | 0.97710502 | 0.91749677 | 0.16646849 | 0 |
| 2021-02-23-10-06-IB100p | A | Dry | 10 | 1.03967922 | 2.270911 | 0.873141 | 2.01045046 | 0.90011584 | 0.98813177 | 0.91092693 | 0.07966706 | 3 |
| 2021-02-26-18-36-IB100p | A | Dry | 18 | 1.03444183 | 1.236686 | 0.262326 | 6.11133267 | 0.81783108 | 0.96355425 | 0.84876495 | 0.03210464 | 0 |
| 2021-03-02-07-54-IB100p | A | Dry | 07 | 1.0072857  | 2.294327 | 0.928815 | 1.88445535 | 0.80190087 | 0.98986832 | 0.81010863 | 0.34844233 | 6 |
| 2021-03-03-09-24-IB100p | A | Dry | 09 | 1.03266672 | 2.300087 | 0.95987  | 4.10272558 | 0.87145423 | 0.99105621 | 0.87931866 | 0.67686088 | 2 |
| 2021-03-06-11-30-IB100p | A | Dry | 11 | 1.02428377 | 2.302231 | 0.98513  | 1.70092648 | 0.86475276 | 0.99071566 | 0.87285666 | 0.20808561 | 5 |
| 2021-03-10-06-42-IB100p | A | Dry | 06 | 1.0183923  | 2.188949 | 0.732767 | 3.04212215 | 0.79333517 | 0.99120227 | 0.80037667 | 0.55219976 | 6 |
| 2021-03-10-08-24-IB100p | A | Dry | 08 | 1.02663657 | 2.299691 | 0.960739 | 4.96497057 | 0.88530322 | 0.99062664 | 0.89368001 | 0.45398335 | 3 |
| 2021-03-12-14-36-IB100p | A | Dry | 14 | 1.02340424 | 2.298416 | 0.948645 | 2.59608097 | 0.8692688  | 0.99068007 | 0.87744654 | 0.53821641 | 1 |
| 2021-03-16-15-06-IB100p | A | Dry | 15 | 1.04857828 | 2.3009   | 0.967422 | 2.32484952 | 0.88925606 | 0.99022016 | 0.89803874 | 0.32770511 | 1 |
| 2021-03-17-07-54-IB100p | A | Dry | 07 | 1.04412777 | 2.008362 | 0.583635 | 2.04786488 | 0.87368344 | 0.97357032 | 0.89740147 | 0.08689655 | 4 |
| 2021-03-17-18-00-IB100p | A | Dry | 18 | 1.0719114  | 1.697814 | 0.426824 | 6.82785635 | 0.78048542 | 0.96472545 | 0.80902335 | 0.05545779 | 2 |
| 2021-03-20-16-18-IB100p | A | Dry | 16 | 1.03380726 | 1.372999 | 0.303093 | 4.07455491 | 0.7979516  | 0.95252324 | 0.83772402 | 0.01450654 | 2 |
| 2021-03-21-09-00-IB100p | A | Dry | 09 | 1.02561107 | 2.135785 | 0.678858 | 3.01300117 | 0.85190258 | 0.9895978  | 0.86085739 | 0.08494649 | 6 |
| 2021-03-25-08-06-IB100p | A | Dry | 08 | 1.03190506 | 2.29555  | 0.934328 | 2.31823408 | 0.89598664 | 0.98660118 | 0.90815484 | 0.21517241 | 5 |
| 2021-03-27-05-48-IB100p | A | Dry | 05 | 1.07155202 | 2.250964 | 0.819874 | 7.00619351 | 0.78913944 | 0.99097916 | 0.79632294 | 0.62154578 | 3 |
| 2021-03-30-05-48-IB100p | A | Dry | 05 | 1.06912824 | 2.124097 | 0.668445 | 5.81583993 | 0.80198505 | 0.98865553 | 0.81118754 | 0.35424495 | 4 |
| 2021-03-30-08-36-IB100p | A | Dry | 08 | 1.0223928  | 2.282172 | 0.894873 | 2.76769393 | 0.87687691 | 0.98984302 | 0.88587472 | 0.38221165 | 3 |
| 2021-03-30-12-24-IB100p | A | Dry | 12 | 1.02892896 | 2.206801 | 0.760729 | 2.83794915 | 0.92527703 | 0.98732363 | 0.93715677 | 0.06891796 | 3 |
| 2021-04-01-14-42-IB100p | A | Dry | 14 | 1.03563889 | 1.553711 | 0.36859  | 2.33582731 | 0.83962955 | 0.93772967 | 0.89538549 | 0.000761   | 4 |
| 2021-04-03-12-42-IB100p | A | Dry | 12 | 1.0288228  | 2.228739 | 0.782739 | 3.10641451 | 0.90478208 | 0.98378612 | 0.91969389 | 0.00837099 | 4 |

|                         |   |     |    |            |          |          |            |            |            |            |            |   |
|-------------------------|---|-----|----|------------|----------|----------|------------|------------|------------|------------|------------|---|
| 2021-04-07-13-18-IB100p | A | Dry | 13 | 1.03210348 | 1.449663 | 0.338844 | 3.59593714 | 0.78090508 | 0.93206062 | 0.83782649 | 0.00133175 | 4 |
| 2021-04-10-10-42-IB100p | A | Dry | 10 | 1.01818587 | 2.302272 | 0.986439 | 1.99495834 | 0.89865581 | 0.98516665 | 0.91218659 | 0.09750297 | 2 |
| 2021-04-11-16-00-IB100p | A | Dry | 16 | 1.03256643 | 2.283782 | 0.891567 | 0.90841606 | 0.90571076 | 0.97401054 | 0.92987778 | 0.02406659 | 2 |
| 2021-04-14-16-48-IB100p | A | Dry | 16 | 1.01246746 | 2.300373 | 0.96329  | 2.24603501 | 0.88078065 | 0.98933223 | 0.89027793 | 0.05992866 | 3 |
| 2021-04-16-06-54-IB100p | A | Dry | 06 | 1.028765   | 1.762236 | 0.44479  | 6.7380294  | 0.82361064 | 0.96644317 | 0.85220804 | 0.0587396  | 4 |
| 2021-04-17-07-12-IB100p | A | Dry | 07 | 1.01053974 | 2.277435 | 0.878566 | 7.25133188 | 0.83521013 | 0.98954967 | 0.84403053 | 0.41550535 | 6 |
| 2021-04-18-05-12-IB100p | A | Dry | 05 | 1.02025992 | 2.251029 | 0.823365 | 6.59385502 | 0.85182805 | 0.9904534  | 0.86003849 | 0.27980975 | 2 |
| 2021-04-19-15-48-IB100p | A | Dry | 15 | 1.02960808 | 1.793257 | 0.494072 | 1.58799801 | 0.83621044 | 0.95884695 | 0.87210002 | 0.00865636 | 2 |
| 2021-04-22-10-06-IB100p | A | Dry | 10 | 1.01433291 | 1.706724 | 0.416788 | 3.03349935 | 0.87754407 | 0.97487872 | 0.90015717 | 0.03338882 | 4 |
| 2021-04-29-15-00-IB100p | A | Dry | 15 | 1.05432907 | 2.26032  | 0.843293 | 2.15881559 | 0.90879133 | 0.98151186 | 0.92590968 | 0.18302021 | 4 |
| 2021-05-02-06-06-IB100p | A | Wet | 06 | 1.01726471 | 2.274499 | 0.869099 | 2.87465673 | 0.87157412 | 0.98957062 | 0.8807599  | 0.17250892 | 5 |
| 2021-05-13-15-06-IB100p | A | Wet | 15 | 1.04833098 | 2.033849 | 0.602844 | 7.58801765 | 0.82245172 | 0.96104059 | 0.85579291 | 0.04147444 | 2 |
| 2021-05-16-11-54-IB100p | A | Wet | 11 | 1.05637698 | 1.866896 | 0.506136 | 6.95331621 | 0.82884748 | 0.97397497 | 0.85099464 | 0.1297503  | 0 |
| 2021-05-17-13-00-IB100p | A | Wet | 13 | 1.016693   | 2.059456 | 0.620321 | 5.93313477 | 0.82872367 | 0.9772788  | 0.84799105 | 0.13931035 | 0 |
| 2021-05-18-07-54-IB100p | A | Wet | 07 | 1.06578494 | 2.297597 | 0.946737 | 6.03384346 | 0.85939786 | 0.98930321 | 0.86869006 | 0.54872771 | 0 |
| 2021-05-18-14-36-IB100p | A | Wet | 14 | 1.02391034 | 2.258269 | 0.834286 | 7.47554716 | 0.8236459  | 0.96669086 | 0.85202616 | 0.07790725 | 4 |
| 2021-05-21-07-54-IB100p | A | Wet | 07 | 1.06156342 | 2.279041 | 0.887257 | 7.69509636 | 0.84983216 | 0.99293874 | 0.85587573 | 0.97260404 | 0 |
| 2021-05-23-18-30-IB100p | A | Wet | 18 | 1.02378848 | 2.297725 | 0.944469 | 4.12604654 | 0.90087178 | 0.98972567 | 0.91022372 | 0.1626635  | 2 |
| 2021-05-27-06-42-IB100p | A | Wet | 06 | 1.04919948 | 2.265043 | 0.865569 | 11.7552772 | 0.8327533  | 0.99397147 | 0.83780402 | 0.98625446 | 1 |
| 2021-05-28-10-54-IB100p | A | Wet | 10 | 1.00822908 | 2.281456 | 0.887738 | 6.53585268 | 0.84341985 | 0.98760621 | 0.8540042  | 0.36223543 | 4 |
| 2021-05-30-14-00-IB100p | A | Wet | 14 | 1.05451434 | 2.239448 | 0.807953 | 7.66096035 | 0.8338519  | 0.98353715 | 0.84780925 | 0.26996433 | 2 |
| 2021-06-03-10-54-IB100p | A | Wet | 10 | 1.07834656 | 2.296631 | 0.940476 | 9.07971634 | 0.83943127 | 0.98844333 | 0.84924573 | 0.47162901 | 2 |
| 2021-06-06-06-48-IB100p | A | Wet | 06 | 1.04312141 | 2.2727   | 0.876543 | 11.4879887 | 0.84361097 | 0.99422878 | 0.8485079  | 1          | 2 |
| 2021-06-08-07-24-IB100p | A | Wet | 07 | 1.06382362 | 2.299632 | 0.959093 | 6.41144364 | 0.88273432 | 0.99260296 | 0.8893126  | 0.95904875 | 1 |
| 2021-06-09-17-18-IB100p | A | Wet | 17 | 1.01794841 | 2.30248  | 0.991941 | 2.10316699 | 0.90648397 | 0.99097802 | 0.91473671 | 0.20561237 | 3 |
| 2021-06-11-16-54-IB100p | A | Wet | 16 | 1.11252361 | 2.30258  | 0.998447 | 1.84823373 | 0.91951144 | 0.98825774 | 0.93043687 | 0.24313912 | 3 |
| 2021-06-12-09-12-IB100p | A | Wet | 09 | 1.01102971 | 2.0379   | 0.618576 | 8.40404071 | 0.82639067 | 0.99028302 | 0.83449948 | 0.65141498 | 4 |
| 2021-06-13-06-42-IB100p | A | Wet | 06 | 1.17149877 | 2.215501 | 0.803843 | 12.4835149 | 0.80169585 | 0.99145851 | 0.80860252 | 0.89250892 | 4 |



|                         |   |     |    |            |          |          |            |            |            |            |            |   |
|-------------------------|---|-----|----|------------|----------|----------|------------|------------|------------|------------|------------|---|
| 2021-06-17-17-18-IB100p | A | Wet | 17 | 1.02582047 | 2.259466 | 0.836519 | 2.86287451 | 0.9070885  | 0.98447698 | 0.92139127 | 0.12965517 | 3 |
| 2021-06-18-14-48-IB100p | A | Wet | 14 | 1.0157955  | 2.259485 | 0.838762 | 7.04250625 | 0.8517571  | 0.98098175 | 0.86827008 | 0.1932937  | 5 |
| 2021-06-20-05-30-IB100p | A | Wet | 05 | 1.09444455 | 2.23463  | 0.814203 | 12.8068885 | 0.80384655 | 0.99069731 | 0.8113947  | 0.82568371 | 3 |
| 2021-06-23-07-00-IB100p | A | Wet | 07 | 1.14302843 | 2.196597 | 0.778993 | 12.8139745 | 0.80383188 | 0.99181314 | 0.81046706 | 0.93888228 | 4 |
| 2021-07-03-14-24-IB100p | A | Wet | 14 | 1.2083372  | 2.302574 | 0.997804 | 2.14501542 | 0.92624198 | 0.98549257 | 0.93987719 | 0.27205708 | 0 |
| 2021-07-04-16-48-IB100p | A | Wet | 16 | 1.01594528 | 2.300442 | 0.966469 | 1.8160444  | 0.92154419 | 0.98899917 | 0.93179471 | 0.0616409  | 0 |
| 2021-07-08-09-00-IB100p | A | Wet | 09 | 1.14774738 | 2.292865 | 0.9235   | 5.44306822 | 0.83724585 | 0.99137553 | 0.84452948 | 0.89921522 | 1 |
| 2021-07-13-06-06-IB100p | A | Wet | 06 | 0.99883496 | 2.090112 | 0.65487  | 5.86502768 | 0.83885043 | 0.98474636 | 0.85184415 | 0.20741974 | 4 |
| 2021-07-16-15-30-IB100p | A | Wet | 15 | 1.05687553 | 2.288559 | 0.929077 | 14.1336774 | 0.85960698 | 0.98870107 | 0.86943061 | 0.4870868  | 1 |
| 2021-07-17-06-48-IB100p | A | Wet | 06 | 1.01452011 | 2.294951 | 0.933261 | 7.47604794 | 0.82335015 | 0.98532191 | 0.83561539 | 0.27167658 | 3 |
| 2021-07-18-13-06-IB100p | A | Wet | 13 | 1.02195241 | 2.211209 | 0.765757 | 7.56686706 | 0.85005064 | 0.97162988 | 0.87487084 | 0.07319857 | 6 |
| 2021-07-19-06-00-IB100p | A | Wet | 06 | 1.12197996 | 2.302567 | 0.996922 | 2.11890142 | 0.89162685 | 0.98829615 | 0.9021859  | 0.3219025  | 3 |
| 2021-07-21-12-12-IB100p | A | Wet | 12 | 1.11814928 | 2.302571 | 0.997611 | 2.24376102 | 0.92255322 | 0.9894702  | 0.9323709  | 0.50482759 | 1 |
| 2021-07-23-18-12-IB100p | A | Wet | 18 | 1.1054008  | 2.302452 | 0.990919 | 4.07871297 | 0.90675403 | 0.99116967 | 0.9148323  | 0.87952438 | 0 |
| 2021-07-24-05-00-IB100p | A | Wet | 05 | 1.13639852 | 2.302569 | 0.997837 | 2.21382085 | 0.92331765 | 0.98884789 | 0.93373072 | 0.45631391 | 0 |
| 2021-07-25-06-48-IB100p | A | Wet | 06 | 1.15161764 | 2.302422 | 0.990885 | 1.31996395 | 0.92435713 | 0.98461699 | 0.93879868 | 0.29678954 | 1 |
| 2021-07-25-08-12-IB100p | A | Wet | 08 | 1.1212735  | 2.30255  | 0.997088 | 1.72321702 | 0.92245609 | 0.98894921 | 0.93276387 | 0.47942925 | 2 |
| 2021-07-25-09-00-IB100p | A | Wet | 09 | 1.15395221 | 2.302551 | 0.995756 | 1.82381138 | 0.92332523 | 0.98712454 | 0.93536853 | 0.35105826 | 1 |
| 2021-07-25-17-06-IB100p | A | Wet | 17 | 1.07794983 | 2.29839  | 0.958464 | 12.4018883 | 0.84902336 | 0.99121916 | 0.85654455 | 0.87971463 | 1 |
| 2021-07-27-10-30-IB100p | A | Wet | 10 | 1.08746333 | 2.291427 | 0.916111 | 2.38692696 | 0.90996151 | 0.98316451 | 0.92554348 | 0.2164566  | 2 |
| 2021-08-01-16-48-IB100p | A | Wet | 16 | 1.01909716 | 2.092442 | 0.662491 | 2.08098711 | 0.85666217 | 0.96551856 | 0.88725603 | 0.04337693 | 2 |
| 2021-08-01-17-54-IB100p | A | Wet | 17 | 1.00798428 | 2.293297 | 0.924637 | 2.49663062 | 0.87769263 | 0.99003971 | 0.88652266 | 0.32989299 | 0 |
| 2021-08-02-11-18-IB100p | A | Wet | 11 | 1.06100446 | 2.171049 | 0.730084 | 2.14840645 | 0.80480902 | 0.97108494 | 0.82877304 | 0.10102259 | 2 |
| 2021-08-03-05-00-IB100p | A | Wet | 05 | 1.18518835 | 2.302569 | 0.997014 | 1.6466633  | 0.92055301 | 0.9866439  | 0.93301445 | 0.28623068 | 0 |
| 2021-08-06-05-00-IB100p | A | Wet | 05 | 1.05896858 | 2.297376 | 0.950501 | 7.76986236 | 0.85394774 | 0.98786334 | 0.86443914 | 0.24423306 | 0 |
| 2021-08-12-08-18-IB100p | A | Wet | 08 | 1.01277061 | 2.299003 | 0.953389 | 5.03866012 | 0.8715589  | 0.97698029 | 0.89209466 | 0.13227111 | 4 |
| 2021-08-21-17-06-IB100p | A | Wet | 17 | 1.08652528 | 2.302301 | 0.986789 | 2.24206926 | 0.91682083 | 0.98978257 | 0.92628508 | 0.60437574 | 0 |
| 2021-08-24-16-12-IB100p | A | Wet | 16 | 1.05157603 | 2.302544 | 0.996116 | 2.30043725 | 0.91543987 | 0.99074601 | 0.92399047 | 0.68917955 | 1 |

|                         |   |     |    |            |          |          |            |            |            |            |            |   |
|-------------------------|---|-----|----|------------|----------|----------|------------|------------|------------|------------|------------|---|
| 2021-08-24-18-42-IB100p | A | Wet | 18 | 1.05196444 | 2.302383 | 0.990143 | 2.85410542 | 0.91119282 | 0.9895273  | 0.92083646 | 0.17778835 | 0 |
| 2021-08-28-11-30-IB100p | A | Wet | 11 | 1.02074815 | 2.13649  | 0.711331 | 8.27213594 | 0.83649043 | 0.98100597 | 0.85268638 | 0.18758621 | 1 |
| 2021-08-29-18-30-IB100p | A | Wet | 18 | 1.02511541 | 2.301538 | 0.976736 | 4.82410977 | 0.90169985 | 0.99018456 | 0.91063817 | 0.15828775 | 1 |
| 2021-09-03-13-30-IB100p | A | Wet | 13 | 1.03714918 | 2.291949 | 0.920198 | 2.05383665 | 0.90631762 | 0.98378981 | 0.92125128 | 0.11557669 | 0 |
| 2021-09-08-17-42-IB100p | A | Wet | 17 | 1.03879038 | 2.302583 | 0.998778 | 2.64003012 | 0.91864943 | 0.99038938 | 0.92756389 | 0.2568371  | 1 |
| 2021-09-23-13-06-IB100p | A | Wet | 13 | 1.03077109 | 2.302557 | 0.995808 | 2.07140222 | 0.91133811 | 0.98650048 | 0.92380909 | 0.30906064 | 1 |
| 2021-09-25-08-06-IB100p | A | Wet | 08 | 1.00000891 | 2.260709 | 0.847002 | 5.69551827 | 0.88699399 | 0.99087982 | 0.89515799 | 0.42615933 | 5 |
| 2021-09-25-15-24-IB100p | A | Wet | 15 | 1.00953315 | 2.283226 | 0.889373 | 3.26305111 | 0.75049528 | 0.99192273 | 0.7566066  | 0.86511296 | 0 |
| 2021-09-27-14-12-IB100p | A | Wet | 14 | 0.99956773 | 2.302482 | 0.992258 | 3.25819208 | 0.90564903 | 0.99133685 | 0.91356336 | 0.24760999 | 5 |
| 2021-09-27-17-12-IB100p | A | Wet | 17 | 1.00124207 | 2.250906 | 0.818043 | 3.36696715 | 0.8977709  | 0.99062459 | 0.90626753 | 0.39581451 | 2 |
| 2021-09-30-05-18-IB100p | A | Wet | 05 | 1.05762234 | 2.302567 | 0.997835 | 2.36432313 | 0.91230066 | 0.98912839 | 0.92232786 | 0.44071344 | 0 |
| 2021-10-01-13-06-IB100p | A | Wet | 13 | 1.01636255 | 1.355755 | 0.323659 | 3.33077336 | 0.86259854 | 0.9740768  | 0.88555496 | 0.07648038 | 0 |
| 2021-10-05-09-54-IB100p | A | Wet | 09 | 1.06369288 | 2.301501 | 0.973644 | 2.48794212 | 0.90836156 | 0.98556959 | 0.92166152 | 0.30249703 | 0 |
| 2021-10-15-12-00-IB100p | A | Wet | 12 | 1.01321445 | 2.298319 | 0.94741  | 2.46509373 | 0.84469541 | 0.9905235  | 0.85277675 | 0.18111772 | 2 |
| 2021-10-18-12-48-IB100p | A | Wet | 12 | 1.0226313  | 0.88375  | 0.200921 | 3.23921588 | 0.76680734 | 0.95594311 | 0.80214747 | 0.01883472 | 1 |
| 2021-10-24-17-42-IB100p | A | Wet | 17 | 1.0174575  | 2.301702 | 0.976426 | 7.34961142 | 0.85299553 | 0.99044536 | 0.86122422 | 0.44470868 | 1 |
| 2021-10-25-10-48-IB100p | A | Wet | 10 | 1.03263355 | 2.302399 | 0.989049 | 2.30319346 | 0.86743022 | 0.9909241  | 0.87537504 | 0.47243757 | 3 |
| 2022-01-01-05-24-IB100p | A | Dry | 05 | 1.00992955 | 2.105563 | 0.661729 | 6.20957918 | 0.80201238 | 0.98813192 | 0.81164505 | 0.28461356 | 0 |
| 2022-01-02-17-54-IB100p | A | Dry | 17 | 1.00265588 | 2.295867 | 0.935038 | 7.27685113 | 0.84682944 | 0.99075745 | 0.85472931 | 0.56175981 | 1 |
| 2022-01-04-14-30-IB100p | A | Dry | 14 | 1.03346109 | 2.302537 | 0.994409 | 2.26155129 | 0.90012113 | 0.98977445 | 0.90942045 | 0.26939358 | 3 |
| 2022-01-06-13-06-IB100p | A | Dry | 13 | 1.01505735 | 2.285503 | 0.897862 | 3.42258995 | 0.88684311 | 0.98951457 | 0.89624058 | 0.03766944 | 3 |
| 2022-01-08-11-18-IB100p | A | Dry | 11 | 1.01993184 | 2.103932 | 0.655959 | 4.33301378 | 0.88637259 | 0.98135759 | 0.90321062 | 0.00856124 | 7 |
| 2022-01-09-17-54-IB100p | A | Dry | 17 | 1.05286928 | 2.300674 | 0.972621 | 10.1527085 | 0.86768031 | 0.98942403 | 0.87695496 | 0.40428062 | 0 |
| 2022-01-10-11-06-IB100p | A | Dry | 11 | 1.01863394 | 1.543103 | 0.368894 | 3.00403862 | 0.83897266 | 0.98318365 | 0.85332242 | 0.03995244 | 4 |
| 2022-01-11-18-30-IB100p | A | Dry | 18 | 1.0382802  | 2.243198 | 0.811046 | 4.59759319 | 0.85108133 | 0.98853133 | 0.86095534 | 0.24613555 | 0 |
| 2022-01-15-11-54-IB100p | A | Dry | 11 | 1.01353964 | 2.299886 | 0.960166 | 3.02404336 | 0.86451189 | 0.98953711 | 0.87365282 | 0.08989299 | 3 |
| 2022-01-15-18-24-IB100p | A | Dry | 18 | 1.04501608 | 2.257424 | 0.835492 | 5.57919277 | 0.83936409 | 0.9881985  | 0.84938814 | 0.29536266 | 0 |
| 2022-01-17-13-24-IB100p | A | Dry | 13 | 1.02709107 | 2.295856 | 0.938709 | 1.85537479 | 0.87062661 | 0.98409864 | 0.88469446 | 0.12252081 | 4 |

|                         |   |     |    |            |          |          |            |            |            |            |            |   |
|-------------------------|---|-----|----|------------|----------|----------|------------|------------|------------|------------|------------|---|
| 2022-01-24-10-00-IB100p | A | Dry | 10 | 1.00565027 | 2.300088 | 0.961221 | 2.79360229 | 0.84373584 | 0.98955148 | 0.85264472 | 0.26254459 | 4 |
| 2022-01-24-15-42-IB100p | A | Dry | 15 | 1.01461658 | 2.301508 | 0.97399  | 2.68392134 | 0.87968691 | 0.99067993 | 0.88796279 | 0.10444709 | 5 |
| 2022-01-29-09-12-IB100p | A | Dry | 09 | 1.00882021 | 2.295479 | 0.931942 | 3.33688388 | 0.86613432 | 0.99065337 | 0.87430613 | 0.26208086 | 4 |
| 2020-07-17-08-36-ADMINp | B | Wet | 08 | 1.021037   | 1.979728 | 0.570063 | 4.75570721 | 0.83341387 | 0.98239242 | 0.84835128 | 0.32541322 | 6 |
| 2020-07-19-07-42-ADMINp | B | Wet | 07 | 1.09661938 | 2.18527  | 0.775118 | 4.14476079 | 0.85565627 | 0.98152198 | 0.87176475 | 0.26859504 | 5 |
| 2020-08-27-17-30-ADMINp | B | Wet | 17 | 1.0291702  | 0.779702 | 0.199141 | 2.61607445 | 0.87147692 | 0.97495615 | 0.89386268 | 0.05423554 | 0 |
| 2020-09-01-17-18-ADMINp | B | Wet | 17 | 1.03524028 | 1.38982  | 0.306747 | 2.97525538 | 0.88513952 | 0.98040888 | 0.90282691 | 0.06818182 | 2 |
| 2020-09-07-07-18-ADMINp | B | Wet | 07 | 1.03560496 | 0.813868 | 0.199159 | 3.90561456 | 0.84248536 | 0.96480826 | 0.87321533 | 0.01859504 | 3 |
| 2020-09-16-16-18-ADMINp | B | Wet | 16 | 1.03239718 | 1.260959 | 0.28976  | 5.44214401 | 0.79193257 | 0.97760167 | 0.81007695 | 0.15340909 | 3 |
| 2020-10-20-18-42-ADMINp | B | Wet | 18 | 1.01965627 | 1.770147 | 0.467391 | 6.85302578 | 0.74867182 | 0.98604425 | 0.75926797 | 0.48708678 | 0 |
| 2020-11-03-08-48-ADMINp | B | Dry | 08 | 1.03406476 | 1.107508 | 0.239405 | 3.21920977 | 0.84860473 | 0.98119068 | 0.86487239 | 0.12396694 | 2 |
| 2020-11-24-16-06-ADMINp | B | Dry | 16 | 1.031982   | 1.078456 | 0.24332  | 6.73322394 | 0.827333   | 0.9768421  | 0.8469465  | 0.10743802 | 3 |
| 2020-11-25-12-48-ADMINp | B | Dry | 12 | 1.0395171  | 2.079607 | 0.627476 | 3.49770295 | 0.8432995  | 0.98380732 | 0.85717954 | 0.18181818 | 4 |
| 2020-12-21-10-54-ADMINp | B | Dry | 10 | 1.04511034 | 1.987599 | 0.561251 | 2.46215195 | 0.88001084 | 0.98222183 | 0.895939   | 0.10123967 | 5 |
| 2020-12-30-13-30-ADMINp | B | Dry | 13 | 1.03753963 | 2.298173 | 0.946376 | 2.0677027  | 0.90878529 | 0.98972002 | 0.91822462 | 0.20144628 | 3 |
| 2021-01-23-15-54-ADMINp | B | Dry | 15 | 1.02606578 | 2.0872   | 0.636822 | 1.50357003 | 0.93357441 | 0.98938764 | 0.9435881  | 0.01911157 | 5 |
| 2021-03-05-10-42-ADMINp | B | Dry | 10 | 1.02662615 | 1.859254 | 0.488052 | 3.03496523 | 0.86142084 | 0.98902452 | 0.87098026 | 0.36828512 | 4 |
| 2021-03-06-13-00-ADMINp | B | Dry | 13 | 1.02594246 | 1.855794 | 0.486055 | 2.40447981 | 0.89537581 | 0.98909954 | 0.90524338 | 0.28099174 | 7 |
| 2021-03-10-07-30-ADMINp | B | Dry | 07 | 1.01731471 | 1.91244  | 0.530632 | 4.78535109 | 0.78104362 | 0.98680618 | 0.79148635 | 0.48347107 | 6 |
| 2021-04-21-11-18-ADMINp | B | Dry | 11 | 1.03311619 | 1.203395 | 0.263661 | 5.14570386 | 0.82647167 | 0.97291784 | 0.84947735 | 0.06198347 | 4 |
| 2021-07-21-11-36-ADMINp | B | Wet | 11 | 1.01572159 | 1.905594 | 0.534097 | 6.24775625 | 0.78794033 | 0.9876637  | 0.797782   | 0.54958678 | 0 |
| 2021-08-05-16-00-ADMINp | B | Wet | 16 | 1.03349709 | 1.714575 | 0.447268 | 4.8706422  | 0.84051264 | 0.97317265 | 0.86368296 | 0.09917355 | 2 |
| 2021-09-09-15-12-ADMINp | B | Wet | 15 | 1.06381092 | 2.266934 | 0.849435 | 5.66178773 | 0.86811678 | 0.98659039 | 0.87991612 | 0.38429752 | 1 |
| 2020-10-21-09-36-ADMINp | B | Wet | 09 | 1.1112076  | 2.197823 | 0.745387 | 4.3160473  | 0.78621355 | 0.97331794 | 0.80776643 | 0.4        | 1 |
| 2020-11-05-14-06-ADMINp | B | Dry | 14 | 1.01968706 | 1.668269 | 0.405068 | 9.9537606  | 0.76599839 | 0.97127341 | 0.78865372 | 0.17777778 | 1 |
| 2020-11-18-18-12-ADMINp | B | Dry | 18 | 1.03106009 | 0.828    | 0.180189 | 3.3436327  | 0.85797944 | 0.98808492 | 0.86832561 | 0.12444444 | 0 |
| 2020-12-04-18-06-ADMINp | B | Dry | 18 | 1.03684402 | 1.137566 | 0.243991 | 7.1389647  | 0.81024469 | 0.96152082 | 0.84266994 | 0.01333333 | 0 |
| 2020-12-06-17-30-ADMINp | B | Dry | 17 | 1.03151315 | 0.962824 | 0.203326 | 7.55282133 | 0.77647782 | 0.96289234 | 0.8064015  | 0.05333333 | 0 |

|                         |   |     |    |            |          |          |            |            |            |            |            |   |
|-------------------------|---|-----|----|------------|----------|----------|------------|------------|------------|------------|------------|---|
| 2020-12-09-09-42-ADMINp | B | Dry | 09 | 1.03570001 | 1.170797 | 0.247812 | 7.16535464 | 0.75888038 | 0.97092745 | 0.78160359 | 0.12444444 | 1 |
| 2021-03-03-18-18-ADMINp | B | Dry | 18 | 1.0377178  | 1.057173 | 0.223113 | 3.44569857 | 0.82377248 | 0.97955919 | 0.84096243 | 0.12444444 | 3 |
| 2021-03-31-12-12-ADMINp | B | Dry | 12 | 1.02288597 | 0.858147 | 0.189093 | 2.27927512 | 0.88860533 | 0.98956872 | 0.89797233 | 0.06666667 | 6 |
| 2021-04-17-09-24-ADMINp | B | Dry | 09 | 1.03948476 | 1.138677 | 0.245433 | 9.40082315 | 0.8208919  | 0.96407954 | 0.85147736 | 0.06666667 | 4 |
| 2021-07-02-08-06-ADMINp | B | Wet | 08 | 1.03551586 | 1.870591 | 0.536169 | 8.76068091 | 0.84094532 | 0.98209274 | 0.85627893 | 0.53666667 | 3 |
| 2020-10-09-05-12-ADMINp | B | Wet | 05 | 1.04655604 | 0.912036 | 0.195459 | 4.85518211 | 0.85544325 | 0.97631603 | 0.87619502 | 0.11851852 | 0 |
| 2020-10-18-06-54-ADMINp | B | Wet | 06 | 1.02743788 | 1.084656 | 0.234883 | 6.26596104 | 0.80438934 | 0.96102994 | 0.83700757 | 0.20740741 | 3 |
| 2020-10-21-07-24-ADMINp | B | Wet | 07 | 1.05519375 | 0.655739 | 0.159617 | 8.44181306 | 0.73894299 | 0.9629671  | 0.76736057 | 0.28444444 | 3 |
| 2020-11-06-14-30-ADMINp | B | Dry | 14 | 1.02779957 | 0.927784 | 0.197757 | 4.84424053 | 0.81207167 | 0.97123899 | 0.83611931 | 0.27259259 | 2 |
| 2020-11-19-11-18-ADMINp | B | Dry | 11 | 1.03935705 | 1.169625 | 0.247824 | 9.16828159 | 0.74172824 | 0.97049642 | 0.76427715 | 0.4345679  | 3 |
| 2020-11-23-15-00-ADMINp | B | Dry | 15 | 1.03114393 | 0.759434 | 0.170459 | 4.65259579 | 0.81154134 | 0.97971242 | 0.82834649 | 0.45333333 | 2 |
| 2020-12-25-12-00-ADMINp | B | Dry | 12 | 1.03297579 | 0.569777 | 0.144264 | 4.20389598 | 0.75554131 | 0.9378113  | 0.80564322 | 0.0237037  | 3 |
| 2021-01-13-14-42-ADMINp | B | Dry | 14 | 1.0257781  | 1.221238 | 0.262454 | 3.32229784 | 0.84066427 | 0.98675761 | 0.85194607 | 0.51851852 | 2 |
| 2021-02-20-17-18-ADMINp | B | Dry | 17 | 1.02644198 | 0.877034 | 0.189387 | 5.00100654 | 0.85624525 | 0.96940996 | 0.88326434 | 0.03111111 | 4 |
| 2021-02-24-08-00-ADMINp | B | Dry | 08 | 1.03973746 | 0.919632 | 0.195377 | 6.76760491 | 0.74888587 | 0.95507266 | 0.78411403 | 0.17185185 | 5 |
| 2021-02-25-11-18-ADMINp | B | Dry | 11 | 1.03308816 | 0.865845 | 0.192922 | 6.19562085 | 0.80984507 | 0.97721402 | 0.82872846 | 0.39802469 | 5 |
| 2021-03-06-17-12-ADMINp | B | Dry | 17 | 1.01887512 | 0.583995 | 0.147203 | 2.4894408  | 0.80309968 | 0.98342473 | 0.81663563 | 0.63555556 | 2 |
| 2021-03-17-05-48-ADMINp | B | Dry | 05 | 1.04233863 | 1.243378 | 0.26511  | 8.41600657 | 0.78178757 | 0.95269094 | 0.82060984 | 0.03703704 | 4 |
| 2021-03-20-09-12-ADMINp | B | Dry | 09 | 1.0256568  | 1.195774 | 0.256362 | 7.12760468 | 0.8604278  | 0.97555833 | 0.88198498 | 0.12888889 | 4 |
| 2021-03-22-05-48-ADMINp | B | Dry | 05 | 1.0296019  | 1.015813 | 0.213561 | 5.95233353 | 0.82021611 | 0.96404211 | 0.85080942 | 0.05876543 | 4 |
| 2021-04-08-11-30-ADMINp | B | Dry | 11 | 1.0269179  | 0.784768 | 0.175925 | 5.80863286 | 0.79735034 | 0.96565452 | 0.82570974 | 0.2908642  | 6 |
| 2021-04-10-06-24-ADMINp | B | Dry | 06 | 1.02530042 | 0.924062 | 0.219463 | 6.13602387 | 0.84730218 | 0.96273474 | 0.88009931 | 0.02962963 | 4 |
| 2021-04-12-10-18-ADMINp | B | Dry | 10 | 1.01928585 | 0.914558 | 0.201825 | 2.94429745 | 0.83608518 | 0.98180547 | 0.85157927 | 0.31061728 | 5 |
| 2021-04-15-06-24-ADMINp | B | Dry | 06 | 1.02166244 | 0.806258 | 0.178546 | 3.98309801 | 0.88885243 | 0.98044793 | 0.90657791 | 0.01728395 | 3 |
| 2021-04-20-14-54-ADMINp | B | Dry | 14 | 1.04787446 | 0.903491 | 0.200315 | 4.75112522 | 0.7418559  | 0.9650413  | 0.76872969 | 0.33777778 | 2 |
| 2021-04-21-10-48-ADMINp | B | Dry | 10 | 1.01915098 | 1.629633 | 0.395706 | 10.7815478 | 0.7725751  | 0.95993291 | 0.80482198 | 0.25037037 | 2 |
| 2021-05-22-13-06-ADMINp | B | Wet | 13 | 1.02786781 | 1.746003 | 0.490137 | 9.23715173 | 0.82877748 | 0.98077624 | 0.84502198 | 0.72888889 | 0 |
| 2021-05-23-09-00-ADMINp | B | Wet | 09 | 1.01860561 | 1.817748 | 0.528096 | 11.4605418 | 0.82204863 | 0.98941828 | 0.83084035 | 0.93333333 | 1 |

|                         |   |     |    |            |          |          |            |            |            |            |            |   |
|-------------------------|---|-----|----|------------|----------|----------|------------|------------|------------|------------|------------|---|
| 2021-05-23-18-18-ADMINp | B | Wet | 18 | 1.02811535 | 1.721268 | 0.440359 | 8.43135543 | 0.87565854 | 0.97553537 | 0.89761845 | 0.17975309 | 2 |
| 2021-06-25-16-42-ADMINp | B | Wet | 16 | 1.0266793  | 1.000751 | 0.211561 | 4.76869214 | 0.8604767  | 0.97724572 | 0.88051212 | 0.07901235 | 1 |
| 2021-06-28-10-36-ADMINp | B | Wet | 10 | 1.03399906 | 0.90775  | 0.202588 | 7.18585846 | 0.78382098 | 0.96843301 | 0.80937036 | 0.33580247 | 3 |
| 2021-07-05-12-42-ADMINp | B | Wet | 12 | 1.10084502 | 1.977433 | 0.560829 | 5.68230156 | 0.73556354 | 0.90511839 | 0.81267107 | 0.01382716 | 2 |
| 2021-07-10-07-24-ADMINp | B | Wet | 07 | 1.01637051 | 1.801375 | 0.470292 | 10.3032148 | 0.83960307 | 0.97340888 | 0.86253895 | 0.44938272 | 3 |
| 2021-07-26-16-00-ADMINp | B | Wet | 16 | 1.03455489 | 1.507043 | 0.352911 | 13.7960455 | 0.69545018 | 0.98923844 | 0.70301572 | 0.97777778 | 1 |
| 2021-08-12-08-18-ADMINp | B | Wet | 08 | 1.02377368 | 0.638437 | 0.153881 | 5.05777774 | 0.84491387 | 0.97145779 | 0.86973812 | 0.13037037 | 2 |
| 2021-08-23-05-18-ADMINp | B | Wet | 05 | 1.04846555 | 1.095622 | 0.233108 | 7.68814419 | 0.64169623 | 0.91578385 | 0.70070709 | 0.01580247 | 1 |
| 2021-08-24-14-30-ADMINp | B | Wet | 14 | 1.07791965 | 1.368213 | 0.307333 | 7.02861131 | 0.74139208 | 0.93779677 | 0.79056795 | 0.04740741 | 3 |
| 2021-08-28-15-06-ADMINp | B | Wet | 15 | 1.02367427 | 1.647857 | 0.407293 | 9.63570199 | 0.81424091 | 0.98388249 | 0.82757942 | 0.7308642  | 1 |
| 2021-09-02-06-00-ADMINp | B | Wet | 06 | 1.03312267 | 1.294255 | 0.29002  | 5.13301321 | 0.87293323 | 0.97345826 | 0.89673412 | 0.02666667 | 2 |
| 2021-09-03-12-24-ADMINp | B | Wet | 12 | 1.0291297  | 1.119752 | 0.237051 | 3.54184996 | 0.86507653 | 0.98518915 | 0.87808167 | 0.20246914 | 2 |
| 2021-09-04-13-06-ADMINp | B | Wet | 13 | 1.03141679 | 0.701162 | 0.161505 | 4.14831539 | 0.82118326 | 0.97256858 | 0.84434484 | 0.17283951 | 2 |
| 2021-09-05-06-18-ADMINp | B | Wet | 06 | 1.02760998 | 1.557934 | 0.361632 | 5.6396844  | 0.86916234 | 0.97729084 | 0.88935894 | 0.09777778 | 4 |
| 2021-09-06-13-36-ADMINp | B | Wet | 13 | 1.02560053 | 1.517966 | 0.343949 | 11.4692726 | 0.76279306 | 0.98312842 | 0.77588344 | 0.80691358 | 1 |
| 2021-09-09-15-36-ADMINp | B | Wet | 15 | 1.02072724 | 1.524654 | 0.362091 | 10.9307181 | 0.70954993 | 0.98886658 | 0.71753859 | 0.93432099 | 1 |
| 2021-09-10-05-30-ADMINp | B | Wet | 05 | 1.0305533  | 0.937778 | 0.201933 | 8.74467325 | 0.75848544 | 0.95395359 | 0.7950968  | 0.08604938 | 2 |
| 2020-09-12-17-42-ADMINp | B | Wet | 17 | 1.04816698 | 1.022523 | 0.236622 | 4.84852697 | 0.8366627  | 0.96107336 | 0.8705503  | 0.02716161 | 0 |
| 2020-10-08-07-18-ADMINp | B | Wet | 07 | 1.04014513 | 0.828796 | 0.179192 | 3.2978137  | 0.84255173 | 0.94831221 | 0.88847504 | 0.00135808 | 4 |
| 2020-10-11-05-42-ADMINp | B | Wet | 05 | 1.04470744 | 1.588297 | 0.380115 | 4.53686896 | 0.88416574 | 0.97195793 | 0.90967491 | 0.04074242 | 1 |
| 2020-10-14-17-00-ADMINp | B | Wet | 17 | 1.03228189 | 1.421878 | 0.317753 | 5.8985985  | 0.86937712 | 0.98454012 | 0.88302864 | 0.32684473 | 2 |
| 2020-11-10-10-42-ADMINp | B | Dry | 10 | 1.03158132 | 2.16786  | 0.707388 | 3.10524559 | 0.81971245 | 0.9891006  | 0.82874527 | 0.83657764 | 2 |
| 2020-11-10-11-42-ADMINp | B | Dry | 11 | 1.03776365 | 1.115341 | 0.24545  | 3.24889954 | 0.88113097 | 0.96935846 | 0.90898363 | 0.02942508 | 1 |
| 2020-11-10-12-00-ADMINp | B | Dry | 12 | 1.03951004 | 1.865106 | 0.490689 | 2.34517257 | 0.90642479 | 0.98378946 | 0.92136054 | 0.05703938 | 2 |
| 2020-11-26-07-18-ADMINp | B | Dry | 07 | 1.03346784 | 1.552624 | 0.35657  | 3.54652338 | 0.89277085 | 0.98043342 | 0.91058794 | 0.06518787 | 3 |
| 2020-12-06-16-30-ADMINp | B | Dry | 16 | 1.03545601 | 1.727197 | 0.423847 | 2.49034792 | 0.88517872 | 0.98782784 | 0.89608602 | 0.40742417 | 2 |
| 2020-12-20-18-48-ADMINp | B | Dry | 18 | 1.03710132 | 2.274216 | 0.867971 | 2.18754209 | 0.90473072 | 0.98909687 | 0.91470385 | 0.25984608 | 2 |
| 2021-01-15-13-12-ADMINp | B | Dry | 13 | 1.03032408 | 1.817403 | 0.465522 | 2.98828451 | 0.89792642 | 0.98534795 | 0.91127852 | 0.17926664 | 4 |

|                         |   |     |    |            |          |          |            |            |            |            |            |   |
|-------------------------|---|-----|----|------------|----------|----------|------------|------------|------------|------------|------------|---|
| 2021-01-18-08-00-ADMINp | B | Dry | 08 | 1.02902455 | 2.056699 | 0.61263  | 2.91034939 | 0.92969715 | 0.98102295 | 0.94768135 | 0.00452694 | 4 |
| 2021-01-25-07-06-ADMINp | B | Dry | 07 | 1.03059093 | 1.800248 | 0.457205 | 3.33588706 | 0.90434293 | 0.98671525 | 0.91651865 | 0.24717067 | 4 |
| 2021-03-25-13-00-ADMINp | B | Dry | 13 | 1.02198996 | 2.000044 | 0.570376 | 4.96287677 | 0.887251   | 0.9824876  | 0.90306585 | 0.1466727  | 4 |
| 2021-04-12-11-06-ADMINp | B | Dry | 11 | 1.02016873 | 1.380382 | 0.315212 | 2.05834181 | 0.8574517  | 0.98773494 | 0.86809899 | 0.63377094 | 4 |
| 2021-04-16-05-36-ADMINp | B | Dry | 05 | 1.03972295 | 2.213043 | 0.768054 | 5.03679424 | 0.94676042 | 0.98484006 | 0.96133419 | 0.06337709 | 6 |
| 2021-06-28-18-18-ADMINp | B | Wet | 18 | 1.03119829 | 2.279363 | 0.895124 | 3.94114999 | 0.91571411 | 0.98394654 | 0.93065433 | 0.07967406 | 4 |
| 2021-07-13-16-24-ADMINp | B | Wet | 16 | 1.02175503 | 1.81885  | 0.490459 | 2.66781537 | 0.84622191 | 0.98202413 | 0.86171193 | 0.17926664 | 4 |
| 2021-07-17-12-36-ADMINp | B | Wet | 12 | 1.02991266 | 2.283957 | 0.899253 | 2.72171705 | 0.94241389 | 0.98927284 | 0.95263294 | 0.09732911 | 4 |
| 2021-07-20-16-54-ADMINp | B | Wet | 16 | 1.01831144 | 1.426573 | 0.323451 | 8.8739648  | 0.80546333 | 0.97649173 | 0.82485423 | 0.14893617 | 1 |
| 2021-07-24-10-42-ADMINp | B | Wet | 10 | 1.02568908 | 2.238221 | 0.802447 | 6.21300684 | 0.85583326 | 0.99035295 | 0.86416995 | 0.95744681 | 3 |
| 2021-07-24-13-18-ADMINp | B | Wet | 13 | 1.02644771 | 2.264622 | 0.844574 | 4.32326785 | 0.88711753 | 0.98891685 | 0.89705978 | 0.50701675 | 4 |
| 2021-07-30-09-00-ADMINp | B | Wet | 09 | 1.02683828 | 2.168844 | 0.70884  | 5.51284855 | 0.86834108 | 0.9857287  | 0.88091285 | 0.42689    | 2 |
| 2021-08-16-10-30-ADMINp | B | Wet | 10 | 1.03482659 | 2.109018 | 0.652279 | 2.51365638 | 0.89359478 | 0.98671206 | 0.90562872 | 0.21502943 | 5 |
| 2021-08-17-14-30-ADMINp | B | Wet | 14 | 1.02615155 | 2.258736 | 0.8323   | 2.88060992 | 0.89434219 | 0.98648651 | 0.90659344 | 0.23902218 | 2 |
| 2021-09-07-15-06-ADMINp | B | Wet | 15 | 1.05155772 | 1.059752 | 0.228537 | 3.25371366 | 0.83509649 | 0.95552391 | 0.87396714 | 0.01539158 | 2 |
| 2021-12-30-15-54-ADMINp | B | Dry | 15 | 1.02641225 | 2.28501  | 0.894962 | 2.11363164 | 0.93186289 | 0.99018773 | 0.94109719 | 0.16659122 | 1 |
| 2022-01-12-11-36-ADMINp | B | Dry | 11 | 1.02509016 | 2.300047 | 0.960449 | 1.70146494 | 0.91709412 | 0.98970242 | 0.92663623 | 0.2444545  | 2 |
| 2022-01-30-06-06-ADMINp | B | Dry | 06 | 1.03056696 | 2.284979 | 0.897597 | 2.69745418 | 0.93884579 | 0.98827244 | 0.94998681 | 0.06880942 | 2 |
| 2020-08-16-09-42-ADMINp | B | Wet | 09 | 1.02874823 | 2.287959 | 0.904878 | 2.14441433 | 0.90741885 | 0.98877987 | 0.91771575 | 0.34877127 | 4 |
| 2020-08-25-09-12-ADMINp | B | Wet | 09 | 1.04192225 | 1.299926 | 0.290849 | 3.70774891 | 0.77534052 | 0.9868573  | 0.7856663  | 0.70699433 | 1 |
| 2020-08-30-14-12-ADMINp | B | Wet | 14 | 1.02701905 | 2.209511 | 0.756431 | 2.66753322 | 0.89345866 | 0.98814232 | 0.90418014 | 0.55293006 | 3 |
| 2020-09-08-12-30-ADMINp | B | Wet | 12 | 1.03853097 | 1.373836 | 0.305772 | 1.94772052 | 0.83331835 | 0.98862222 | 0.84290878 | 0.69943289 | 2 |
| 2020-09-19-09-30-ADMINp | B | Wet | 09 | 1.02184298 | 1.650667 | 0.406248 | 5.60203699 | 0.78564779 | 0.97937708 | 0.80219132 | 0.25803403 | 2 |
| 2020-09-20-12-54-ADMINp | B | Wet | 12 | 1.03575486 | 1.956384 | 0.548652 | 5.45668266 | 0.9059805  | 0.98063283 | 0.92387331 | 0.16068053 | 1 |
| 2020-11-04-06-36-ADMINp | B | Dry | 06 | 1.05745248 | 1.131066 | 0.241007 | 4.62613219 | 0.83968578 | 0.96129216 | 0.87349697 | 0.00897921 | 5 |
| 2020-11-11-13-00-ADMINp | B | Dry | 13 | 1.02790393 | 2.172568 | 0.720882 | 7.12284623 | 0.8333541  | 0.98389438 | 0.84699548 | 0.44706994 | 0 |
| 2020-11-21-05-24-ADMINp | B | Dry | 05 | 1.03876737 | 2.282331 | 0.889072 | 3.53702346 | 0.93137174 | 0.98464597 | 0.94589504 | 0.02362949 | 0 |
| 2020-11-25-10-18-ADMINp | B | Dry | 10 | 1.02276409 | 1.703156 | 0.425468 | 5.97755238 | 0.80786159 | 0.98782413 | 0.81781924 | 0.80434783 | 1 |

|                         |   |     |    |            |          |          |            |            |            |            |            |   |
|-------------------------|---|-----|----|------------|----------|----------|------------|------------|------------|------------|------------|---|
| 2020-11-26-07-30-ADMINp | B | Dry | 07 | 1.03509788 | 2.13182  | 0.675067 | 2.97489477 | 0.92139024 | 0.98739159 | 0.93315585 | 0.25519849 | 4 |
| 2020-11-27-05-48-ADMINp | B | Dry | 05 | 1.0383152  | 2.262368 | 0.846717 | 1.61745676 | 0.96373811 | 0.99042241 | 0.97305765 | 0.02126654 | 1 |
| 2020-11-27-15-30-ADMINp | B | Dry | 15 | 1.03987336 | 2.219825 | 0.7712   | 2.2341529  | 0.9063847  | 0.98714405 | 0.91818889 | 0.28119093 | 2 |
| 2020-11-30-18-12-ADMINp | B | Dry | 18 | 1.03879282 | 2.277315 | 0.875844 | 2.84489836 | 0.91339614 | 0.98251588 | 0.92965026 | 0.03780718 | 0 |
| 2020-12-01-12-00-ADMINp | B | Dry | 12 | 1.03481614 | 1.905808 | 0.519094 | 6.15483762 | 0.84217538 | 0.98614163 | 0.85401058 | 0.55671078 | 0 |
| 2020-12-21-10-48-ADMINp | B | Dry | 10 | 1.04364897 | 1.68876  | 0.408286 | 2.50236249 | 0.8728124  | 0.98083541 | 0.88986633 | 0.22967864 | 4 |
| 2021-01-12-11-54-ADMINp | B | Dry | 11 | 1.03407165 | 2.181817 | 0.724063 | 2.27832021 | 0.89831821 | 0.98800804 | 0.90922156 | 0.41304348 | 4 |
| 2021-02-17-17-00-ADMINp | B | Dry | 17 | 1.03171439 | 1.312671 | 0.284591 | 2.98427569 | 0.89898451 | 0.97957832 | 0.91772601 | 0.10586011 | 2 |
| 2021-02-28-08-06-ADMINp | B | Dry | 08 | 1.03508827 | 2.168212 | 0.711293 | 2.07680446 | 0.92407543 | 0.98647614 | 0.93674382 | 0.09357278 | 6 |
| 2021-03-02-15-00-ADMINp | B | Dry | 15 | 1.02870146 | 2.060142 | 0.612169 | 2.65408609 | 0.8819759  | 0.98636054 | 0.89417192 | 0.48393195 | 5 |
| 2021-03-03-16-24-ADMINp | B | Dry | 16 | 1.03303749 | 0.815192 | 0.186763 | 2.25687312 | 0.82705828 | 0.96759059 | 0.85476056 | 0.03119093 | 5 |
| 2021-03-03-17-30-ADMINp | B | Dry | 17 | 1.02978147 | 1.174004 | 0.260729 | 2.99363596 | 0.88601185 | 0.97986306 | 0.90422008 | 0.19659735 | 2 |
| 2021-03-10-13-36-ADMINp | B | Dry | 13 | 1.01397506 | 1.936825 | 0.543158 | 5.57926542 | 0.78572342 | 0.99014583 | 0.79354313 | 0.93572779 | 3 |
| 2021-03-17-11-18-ADMINp | B | Dry | 11 | 1.02514966 | 1.630597 | 0.384875 | 4.05111003 | 0.8441895  | 0.97979239 | 0.86160038 | 0.24810964 | 5 |
| 2021-03-27-05-30-ADMINp | B | Dry | 05 | 1.03283988 | 2.272163 | 0.861764 | 2.68250984 | 0.92886645 | 0.9855697  | 0.94246653 | 0.06616257 | 3 |
| 2021-04-07-17-00-ADMINp | B | Dry | 17 | 1.03266485 | 1.887319 | 0.502731 | 3.05586475 | 0.86450384 | 0.97887608 | 0.88315964 | 0.1758034  | 4 |
| 2021-05-21-14-00-ADMINp | B | Wet | 14 | 1.02359717 | 1.531681 | 0.354066 | 4.82852362 | 0.84115219 | 0.97539566 | 0.86237024 | 0.08506616 | 0 |
| 2021-06-26-06-12-ADMINp | B | Wet | 06 | 1.02980123 | 2.188559 | 0.741764 | 6.12812416 | 0.92799406 | 0.98899188 | 0.93832324 | 0.57561437 | 4 |
| 2021-07-04-14-12-ADMINp | B | Wet | 14 | 1.02900816 | 1.99655  | 0.570515 | 7.09937543 | 0.85778662 | 0.9858572  | 0.87009217 | 0.53449906 | 1 |
| 2021-07-09-08-18-ADMINp | B | Wet | 08 | 1.01962097 | 2.108426 | 0.655429 | 6.86657482 | 0.84965547 | 0.9829347  | 0.86440683 | 0.39697543 | 2 |
| 2021-07-18-14-30-ADMINp | B | Wet | 14 | 1.03101149 | 1.412875 | 0.318438 | 5.07697414 | 0.84815317 | 0.96990389 | 0.87447136 | 0.04820416 | 2 |
| 2021-07-18-15-00-ADMINp | B | Wet | 15 | 1.0321495  | 1.274093 | 0.274827 | 3.08951155 | 0.86470826 | 0.97172023 | 0.88987368 | 0.0415879  | 2 |
| 2021-08-09-06-06-ADMINp | B | Wet | 06 | 1.02824248 | 2.111297 | 0.657016 | 3.70167445 | 0.93055705 | 0.98130649 | 0.94828381 | 0.07183365 | 4 |
| 2021-08-31-18-42-ADMINp | B | Wet | 18 | 1.03304573 | 1.474451 | 0.33719  | 3.3367358  | 0.88791105 | 0.98458111 | 0.90181606 | 0.28355388 | 0 |
| 2021-09-04-09-54-ADMINp | B | Wet | 09 | 1.03289846 | 2.243043 | 0.804773 | 2.03181538 | 0.88372894 | 0.98527578 | 0.89693563 | 0.26795841 | 1 |
| 2021-09-08-07-42-ADMINp | B | Wet | 07 | 1.02666642 | 2.293101 | 0.92349  | 6.66864709 | 0.85100446 | 0.99087871 | 0.85883817 | 0.89130435 | 0 |
| 2021-12-01-18-24-ADMINp | B | Dry | 18 | 1.03144915 | 2.244258 | 0.809016 | 3.65278086 | 0.93694837 | 0.98919839 | 0.94717943 | 0.06096408 | 0 |
| 2021-12-04-08-00-ADMINp | B | Dry | 08 | 1.02758421 | 1.830932 | 0.473018 | 3.08155173 | 0.89595667 | 0.98604594 | 0.90863582 | 0.39697543 | 1 |

|                         |   |     |    |            |          |          |            |            |            |            |            |   |
|-------------------------|---|-----|----|------------|----------|----------|------------|------------|------------|------------|------------|---|
| 2021-12-29-06-54-ADMINp | B | Dry | 06 | 1.02601153 | 2.191301 | 0.739015 | 2.8346959  | 0.92616001 | 0.98508486 | 0.94018298 | 0.08601134 | 4 |
| 2021-12-31-16-48-ADMINp | B | Dry | 16 | 1.03012527 | 1.469496 | 0.334724 | 2.39681823 | 0.89083289 | 0.98446904 | 0.90488665 | 0.26086957 | 3 |
| 2022-01-05-08-12-ADMINp | B | Dry | 08 | 1.03236072 | 0.800654 | 0.188201 | 2.11824313 | 0.90696396 | 0.9767581  | 0.92854511 | 0.04619565 | 5 |
| 2020-12-12-05-48-ADMINp | B | Dry | 05 | 1.03877542 | 2.288619 | 0.907041 | 2.14310162 | 0.91934001 | 0.98972962 | 0.92887997 | 0.2403805  | 1 |
| 2020-12-14-11-36-ADMINp | B | Dry | 11 | 1.03602286 | 1.18085  | 0.251632 | 4.7362559  | 0.81082305 | 0.97266824 | 0.83360699 | 0.07990488 | 1 |
| 2020-12-23-11-30-ADMINp | B | Dry | 11 | 1.04128471 | 1.79175  | 0.456152 | 4.246042   | 0.81571325 | 0.98306514 | 0.82976521 | 0.33022592 | 2 |
| 2020-12-30-08-12-ADMINp | B | Dry | 08 | 1.04228939 | 2.115364 | 0.659052 | 3.98956495 | 0.88677536 | 0.98426353 | 0.90095318 | 0.22525565 | 2 |
| 2021-01-06-12-06-ADMINp | B | Dry | 12 | 1.03562763 | 2.1071   | 0.649625 | 3.23075263 | 0.86014721 | 0.98508353 | 0.87317185 | 0.32080856 | 0 |
| 2021-01-07-06-30-ADMINp | B | Dry | 06 | 1.03868554 | 1.186895 | 0.254076 | 4.71861082 | 0.85673876 | 0.97000413 | 0.88323207 | 0.03766944 | 1 |
| 2021-01-12-13-36-ADMINp | B | Dry | 13 | 1.03092737 | 1.298606 | 0.286257 | 6.36862053 | 0.80969253 | 0.96081812 | 0.84271155 | 0.03429251 | 2 |
| 2021-02-15-11-24-ADMINp | B | Dry | 11 | 1.0323696  | 1.026362 | 0.222943 | 4.23850854 | 0.86488859 | 0.97753209 | 0.88476746 | 0.12841855 | 5 |
| 2021-02-15-13-18-ADMINp | B | Dry | 13 | 1.03021086 | 1.446053 | 0.321867 | 2.70395261 | 0.8529275  | 0.97813809 | 0.87199089 | 0.13583829 | 2 |
| 2021-02-15-18-12-ADMINp | B | Dry | 18 | 1.03751769 | 1.274276 | 0.274997 | 4.24370839 | 0.85955363 | 0.9661421  | 0.8896762  | 0.02321046 | 1 |
| 2021-02-16-06-18-ADMINp | B | Dry | 06 | 1.04065532 | 1.389375 | 0.30579  | 4.35144366 | 0.82266287 | 0.95673298 | 0.85986674 | 0.00599287 | 4 |
| 2021-02-17-07-30-ADMINp | B | Dry | 07 | 1.03810585 | 1.206438 | 0.259072 | 3.09270286 | 0.88800587 | 0.98256351 | 0.90376435 | 0.18677765 | 4 |
| 2021-02-18-15-24-ADMINp | B | Dry | 15 | 1.03578014 | 1.675854 | 0.406317 | 4.75806518 | 0.83032307 | 0.97895969 | 0.8481688  | 0.21060642 | 1 |
| 2021-02-18-16-00-ADMINp | B | Dry | 16 | 1.0281318  | 1.413459 | 0.315395 | 3.771705   | 0.8791181  | 0.98752477 | 0.89022385 | 0.43833532 | 2 |
| 2021-02-20-07-24-ADMINp | B | Dry | 07 | 1.01976364 | 1.067607 | 0.237877 | 3.38805181 | 0.86548631 | 0.9695959  | 0.8926258  | 0.03086801 | 4 |
| 2021-02-20-16-42-ADMINp | B | Dry | 16 | 1.03144643 | 2.013085 | 0.579322 | 2.06973325 | 0.92481235 | 0.99050234 | 0.93368013 | 0.27690844 | 1 |
| 2021-02-20-17-12-ADMINp | B | Dry | 17 | 1.03110926 | 1.183867 | 0.25355  | 2.7610595  | 0.89809148 | 0.98143846 | 0.91507672 | 0.10059453 | 2 |
| 2021-02-20-17-36-ADMINp | B | Dry | 17 | 1.03281511 | 2.097031 | 0.643943 | 1.93281289 | 0.93046066 | 0.98666266 | 0.94303828 | 0.10344828 | 3 |
| 2021-02-21-10-48-ADMINp | B | Dry | 10 | 1.03358619 | 2.292321 | 0.921773 | 2.60208997 | 0.93953016 | 0.98430104 | 0.95451506 | 0.02511296 | 4 |
| 2021-02-22-18-42-ADMINp | B | Dry | 18 | 1.03409726 | 2.292825 | 0.923802 | 2.75567581 | 0.93227172 | 0.98843626 | 0.94317839 | 0.12142687 | 0 |
| 2021-02-23-06-00-ADMINp | B | Dry | 06 | 1.03659667 | 1.306221 | 0.28879  | 2.84425517 | 0.89127784 | 0.95998426 | 0.92842964 | 0.00237812 | 2 |
| 2021-02-23-13-36-ADMINp | B | Dry | 13 | 1.04213683 | 1.235085 | 0.265094 | 4.73671917 | 0.79773715 | 0.97614097 | 0.8172356  | 0.15695601 | 3 |
| 2021-02-26-15-18-ADMINp | B | Dry | 15 | 1.03129877 | 2.194807 | 0.73781  | 3.05591816 | 0.84421585 | 0.98803016 | 0.8544434  | 0.59491082 | 3 |
| 2021-02-27-08-36-ADMINp | B | Dry | 08 | 1.03246297 | 2.234666 | 0.791434 | 2.79914514 | 0.90647533 | 0.98546225 | 0.91984785 | 0.20413793 | 4 |
| 2021-02-27-10-30-ADMINp | B | Dry | 10 | 1.03833635 | 1.852726 | 0.483077 | 2.39302047 | 0.91128859 | 0.98709449 | 0.923203   | 0.19043995 | 5 |



|                         |   |     |    |            |          |          |            |            |            |            |            |   |
|-------------------------|---|-----|----|------------|----------|----------|------------|------------|------------|------------|------------|---|
| 2021-03-02-14-24-ADMINp | B | Dry | 14 | 1.03132831 | 1.333083 | 0.291684 | 4.5032938  | 0.88152935 | 0.98305213 | 0.89672697 | 0.21764566 | 6 |
| 2021-03-03-11-00-ADMINp | B | Dry | 11 | 1.03070995 | 1.384208 | 0.309088 | 4.88586222 | 0.84771299 | 0.97769223 | 0.86705505 | 0.15776457 | 6 |
| 2021-03-04-17-36-ADMINp | B | Dry | 17 | 1.0288086  | 2.100948 | 0.644268 | 2.81025957 | 0.86743782 | 0.9888169  | 0.87724818 | 0.58863258 | 1 |
| 2021-03-06-07-12-ADMINp | B | Dry | 07 | 1.02446136 | 1.681621 | 0.406609 | 4.11613163 | 0.92229369 | 0.98429085 | 0.93701337 | 0.15457788 | 6 |
| 2021-03-06-10-48-ADMINp | B | Dry | 10 | 1.02515653 | 1.364524 | 0.299222 | 3.51380046 | 0.88831291 | 0.98634936 | 0.90060676 | 0.31976219 | 5 |
| 2021-03-12-17-00-ADMINp | B | Dry | 17 | 1.02737691 | 2.295479 | 0.93504  | 2.2084706  | 0.93272542 | 0.9873473  | 0.94467816 | 0.10615933 | 3 |
| 2021-03-13-12-06-ADMINp | B | Dry | 12 | 1.03004461 | 2.24401  | 0.807435 | 2.2619634  | 0.91960295 | 0.98944412 | 0.92941372 | 0.29450654 | 6 |
| 2021-03-15-14-12-ADMINp | B | Dry | 14 | 1.02773264 | 1.55907  | 0.360509 | 4.03372599 | 0.86475135 | 0.97598215 | 0.88603193 | 0.09360285 | 4 |
| 2021-03-16-08-12-ADMINp | B | Dry | 08 | 1.01851612 | 1.419079 | 0.317131 | 6.01924879 | 0.83934821 | 0.97988241 | 0.85658054 | 0.24960761 | 3 |
| 2021-03-16-09-30-ADMINp | B | Dry | 09 | 1.04094969 | 1.476177 | 0.337688 | 7.17747164 | 0.85449246 | 0.9735032  | 0.87775002 | 0.0706302  | 2 |
| 2021-03-16-12-18-ADMINp | B | Dry | 12 | 1.03827018 | 1.88857  | 0.503523 | 2.96507135 | 0.83901307 | 0.98844767 | 0.84881891 | 0.67120095 | 4 |
| 2021-03-18-10-00-ADMINp | B | Dry | 10 | 1.03225051 | 1.885118 | 0.501624 | 2.85063323 | 0.90041699 | 0.98527936 | 0.91386973 | 0.22259215 | 5 |
| 2021-03-23-08-48-ADMINp | B | Dry | 08 | 1.0291997  | 1.195315 | 0.263116 | 2.98725425 | 0.93747659 | 0.98561568 | 0.95115836 | 0.06958383 | 4 |
| 2021-03-24-10-54-ADMINp | B | Dry | 10 | 1.03202468 | 2.057448 | 0.610155 | 2.9443965  | 0.86309578 | 0.98552955 | 0.87576855 | 0.34601665 | 4 |
| 2021-03-24-16-12-ADMINp | B | Dry | 16 | 1.02844382 | 2.255954 | 0.826671 | 2.92841555 | 0.87310664 | 0.98935551 | 0.88250041 | 0.60879905 | 4 |
| 2021-03-27-14-00-ADMINp | B | Dry | 14 | 1.02520551 | 0.779534 | 0.182226 | 2.4546616  | 0.87217368 | 0.9855779  | 0.88493631 | 0.33978597 | 6 |
| 2021-03-27-18-30-ADMINp | B | Dry | 18 | 1.02738944 | 1.088321 | 0.230907 | 2.17538481 | 0.86761507 | 0.98153061 | 0.88394091 | 0.18263972 | 2 |
| 2021-03-28-18-54-ADMINp | B | Dry | 18 | 1.02875524 | 2.243815 | 0.811072 | 1.95347922 | 0.88835316 | 0.98497377 | 0.9019054  | 0.22972652 | 0 |
| 2021-03-31-05-06-ADMINp | B | Dry | 05 | 1.03490146 | 2.30205  | 0.982115 | 2.82292891 | 0.95718911 | 0.98971654 | 0.9671346  | 0.0313912  | 1 |
| 2021-04-08-14-48-ADMINp | B | Dry | 14 | 1.02428275 | 0.953184 | 0.211116 | 1.66238611 | 0.90008062 | 0.98766273 | 0.91132387 | 0.32019025 | 6 |
| 2021-04-08-16-06-ADMINp | B | Dry | 16 | 1.03327765 | 1.149127 | 0.245395 | 3.09074405 | 0.86951438 | 0.983243   | 0.88433315 | 0.2388585  | 3 |
| 2021-04-10-12-48-ADMINp | B | Dry | 12 | 1.02329174 | 2.297468 | 0.946354 | 2.4635304  | 0.93659374 | 0.9889798  | 0.9470302  | 0.16551724 | 3 |
| 2021-04-12-15-00-ADMINp | B | Dry | 15 | 1.02158992 | 1.409472 | 0.325864 | 2.40095751 | 0.90206165 | 0.98635775 | 0.914538   | 0.30002378 | 5 |
| 2021-04-15-10-12-ADMINp | B | Dry | 10 | 1.03212987 | 1.460853 | 0.327204 | 3.96606405 | 0.85048867 | 0.97543545 | 0.87190667 | 0.09521998 | 4 |
| 2021-04-16-14-06-ADMINp | B | Dry | 14 | 1.02604803 | 1.1435   | 0.249802 | 3.18563506 | 0.88522702 | 0.98475671 | 0.89892966 | 0.27814507 | 2 |
| 2021-04-18-12-54-ADMINp | B | Dry | 12 | 1.02392445 | 2.186615 | 0.728878 | 3.12022881 | 0.91199333 | 0.98351089 | 0.9272834  | 0.15181926 | 5 |
| 2021-05-23-09-24-ADMINp | B | Wet | 09 | 1.02401609 | 2.141828 | 0.702989 | 6.68928669 | 0.90865842 | 0.98755313 | 0.92011092 | 0.48442331 | 3 |
| 2021-06-26-15-00-ADMINp | B | Wet | 15 | 1.03364026 | 2.263452 | 0.854093 | 4.10388576 | 0.92965364 | 0.98544511 | 0.9433845  | 0.09027348 | 1 |

|                         |   |     |    |            |          |          |            |            |            |            |            |   |
|-------------------------|---|-----|----|------------|----------|----------|------------|------------|------------|------------|------------|---|
| 2021-06-26-16-54-ADMINp | B | Wet | 16 | 1.03390339 | 2.301515 | 0.976753 | 6.25300162 | 0.95407511 | 0.98855591 | 0.96512003 | 0.10939358 | 4 |
| 2021-06-28-13-24-ADMINp | B | Wet | 13 | 1.02591097 | 1.672701 | 0.403137 | 4.98269299 | 0.82796615 | 0.97746296 | 0.84705629 | 0.16694411 | 0 |
| 2021-06-28-15-12-ADMINp | B | Wet | 15 | 1.02942082 | 1.488173 | 0.350727 | 6.70326174 | 0.84755142 | 0.9860475  | 0.85954421 | 0.47181926 | 2 |
| 2021-06-29-07-30-ADMINp | B | Wet | 07 | 1.02142706 | 1.909857 | 0.562341 | 7.4528104  | 0.87392504 | 0.97353813 | 0.89767931 | 0.09512485 | 3 |
| 2021-06-29-13-00-ADMINp | B | Wet | 13 | 1.03067609 | 2.24161  | 0.807179 | 4.75736987 | 0.9148682  | 0.97746605 | 0.93595906 | 0.04261593 | 4 |
| 2021-07-02-09-36-ADMINp | B | Wet | 09 | 1.02943025 | 1.919757 | 0.527904 | 7.37015702 | 0.80050481 | 0.95901078 | 0.8347193  | 0.02530321 | 2 |
| 2021-07-02-09-48-ADMINp | B | Wet | 09 | 1.01961737 | 2.145547 | 0.699962 | 5.15534871 | 0.81067094 | 0.96058108 | 0.84393806 | 0.03881094 | 3 |
| 2021-07-03-18-24-ADMINp | B | Wet | 18 | 1.06036326 | 1.656561 | 0.401154 | 7.7341711  | 0.78375952 | 0.92390776 | 0.84830928 | 0.00147444 | 3 |
| 2021-07-05-17-36-ADMINp | B | Wet | 17 | 1.02949183 | 2.169191 | 0.718535 | 5.91108742 | 0.85281755 | 0.99029002 | 0.86117959 | 0.88589774 | 2 |
| 2021-07-07-12-48-ADMINp | B | Wet | 12 | 1.03513171 | 2.223678 | 0.78316  | 3.94068078 | 0.86960526 | 0.98772576 | 0.88041165 | 0.52394768 | 2 |
| 2021-07-10-06-12-ADMINp | B | Wet | 06 | 1.03244374 | 2.071592 | 0.625211 | 5.22828377 | 0.87396549 | 0.97051408 | 0.90051809 | 0.0537931  | 2 |
| 2021-07-11-06-06-ADMINp | B | Wet | 06 | 1.03673703 | 2.209882 | 0.758661 | 3.37138933 | 0.9171259  | 0.98360297 | 0.93241473 | 0.0937931  | 4 |
| 2021-07-13-17-00-ADMINp | B | Wet | 17 | 1.01352325 | 2.290182 | 0.913081 | 12.7730505 | 0.81285284 | 0.99148326 | 0.81983516 | 1          | 2 |
| 2021-07-15-05-36-ADMINp | B | Wet | 05 | 1.02564078 | 1.657603 | 0.409488 | 7.13010036 | 0.87434826 | 0.98767807 | 0.88525632 | 0.56599287 | 3 |
| 2021-07-17-10-00-ADMINp | B | Wet | 10 | 1.01817667 | 2.298385 | 0.949154 | 7.58329898 | 0.84908264 | 0.98739052 | 0.85992586 | 0.61697979 | 2 |
| 2021-07-17-18-30-ADMINp | B | Wet | 18 | 1.02165979 | 2.19083  | 0.737518 | 8.72451288 | 0.80017525 | 0.98761869 | 0.81020667 | 0.67120095 | 0 |
| 2021-07-18-10-30-ADMINp | B | Wet | 10 | 1.03162871 | 1.179336 | 0.251912 | 2.78611846 | 0.89831835 | 0.97951048 | 0.91710949 | 0.07976219 | 3 |
| 2021-07-18-12-06-ADMINp | B | Wet | 12 | 1.03285901 | 2.266662 | 0.866252 | 2.49256726 | 0.94644986 | 0.98771976 | 0.95821699 | 0.06725327 | 3 |
| 2021-07-20-09-00-ADMINp | B | Wet | 09 | 1.03521305 | 1.53626  | 0.36383  | 4.22135134 | 0.94645684 | 0.97809731 | 0.96765099 | 0.00627824 | 5 |
| 2021-07-21-15-00-ADMINp | B | Wet | 15 | 1.03493651 | 2.255678 | 0.8301   | 2.01662662 | 0.92392838 | 0.98666646 | 0.9364141  | 0.08789536 | 2 |
| 2021-07-23-05-42-ADMINp | B | Wet | 05 | 1.03257097 | 2.268203 | 0.851673 | 4.73645645 | 0.93753425 | 0.99022474 | 0.94678937 | 0.19690844 | 3 |
| 2021-07-27-18-00-ADMINp | B | Wet | 18 | 1.04333619 | 1.475504 | 0.332756 | 3.35126563 | 0.88414914 | 0.97932819 | 0.90281189 | 0.13726516 | 2 |
| 2021-07-29-11-30-ADMINp | B | Wet | 11 | 1.03965009 | 1.893987 | 0.507088 | 3.47889988 | 0.85541366 | 0.9843485  | 0.86901505 | 0.33778835 | 3 |
| 2021-08-04-06-54-ADMINp | B | Wet | 06 | 1.0367191  | 0.956168 | 0.208157 | 3.73123753 | 0.89306125 | 0.97942111 | 0.91182561 | 0.13555291 | 5 |
| 2021-08-04-18-30-ADMINp | B | Wet | 18 | 1.03385235 | 1.487148 | 0.348784 | 7.58534655 | 0.83376192 | 0.97363308 | 0.85634099 | 0.10915577 | 0 |
| 2021-08-06-08-24-ADMINp | B | Wet | 08 | 1.03365889 | 1.995788 | 0.569269 | 6.0659615  | 0.85825732 | 0.97643848 | 0.87896712 | 0.15086801 | 3 |
| 2021-08-06-13-18-ADMINp | B | Wet | 13 | 1.0367177  | 1.560385 | 0.366843 | 7.10725303 | 0.80198792 | 0.96866277 | 0.82793305 | 0.06753864 | 0 |
| 2021-08-07-17-24-ADMINp | B | Wet | 17 | 1.02682997 | 2.001814 | 0.579926 | 4.9243585  | 0.89034261 | 0.98600204 | 0.90298253 | 0.34568371 | 2 |

|                         |   |     |    |            |          |          |            |            |            |            |            |   |
|-------------------------|---|-----|----|------------|----------|----------|------------|------------|------------|------------|------------|---|
| 2021-08-10-16-18-ADMINp | B | Wet | 16 | 1.03131694 | 2.257264 | 0.831542 | 7.73546551 | 0.87776646 | 0.98796033 | 0.88846327 | 0.54435196 | 2 |
| 2021-08-12-09-18-ADMINp | B | Wet | 09 | 1.02950286 | 2.254646 | 0.825827 | 3.12188472 | 0.8970854  | 0.97751609 | 0.91771931 | 0.0537931  | 3 |
| 2021-08-15-08-48-ADMINp | B | Wet | 08 | 1.03368278 | 2.060724 | 0.616762 | 2.77343027 | 0.95605041 | 0.98700222 | 0.96864059 | 0.02568371 | 5 |
| 2021-08-17-08-48-ADMINp | B | Wet | 08 | 1.02931991 | 2.091213 | 0.657487 | 8.16910325 | 0.7943968  | 0.97521031 | 0.81459025 | 0.14083234 | 1 |
| 2021-08-19-16-42-ADMINp | B | Wet | 16 | 1.03271126 | 2.297223 | 0.942174 | 3.03638888 | 0.94337381 | 0.98876487 | 0.95409317 | 0.08347206 | 1 |
| 2021-08-21-11-36-ADMINp | B | Wet | 11 | 1.04161555 | 1.712215 | 0.423777 | 1.60109645 | 0.88912277 | 0.98057522 | 0.90673591 | 0.09407848 | 3 |
| 2021-08-21-17-48-ADMINp | B | Wet | 17 | 1.03209549 | 2.211381 | 0.759937 | 3.22399031 | 0.90481104 | 0.98854787 | 0.91529309 | 0.36328181 | 1 |
| 2021-08-21-18-00-ADMINp | B | Wet | 18 | 1.03110639 | 1.889606 | 0.524571 | 5.84634292 | 0.8372203  | 0.97984186 | 0.85444431 | 0.24161712 | 2 |
| 2021-08-22-07-24-ADMINp | B | Wet | 07 | 1.03006788 | 1.120865 | 0.240972 | 2.32573302 | 0.93617163 | 0.98009719 | 0.95518244 | 0.0179786  | 4 |
| 2021-08-22-15-00-ADMINp | B | Wet | 15 | 1.02448936 | 2.228026 | 0.784275 | 7.39317442 | 0.84529673 | 0.98489855 | 0.85825766 | 0.42335315 | 1 |
| 2021-08-24-07-12-ADMINp | B | Wet | 07 | 1.02906229 | 1.373343 | 0.30326  | 3.76425597 | 0.91865424 | 0.98388048 | 0.93370512 | 0.13412604 | 4 |
| 2021-08-25-09-54-ADMINp | B | Wet | 09 | 1.03461859 | 1.867647 | 0.495465 | 4.02475165 | 0.90697441 | 0.98340489 | 0.92227975 | 0.13864447 | 2 |
| 2021-08-26-13-00-ADMINp | B | Wet | 13 | 1.03884564 | 2.136643 | 0.677871 | 1.83265375 | 0.87737323 | 0.99048301 | 0.88580341 | 0.59686088 | 4 |
| 2021-08-28-10-06-ADMINp | B | Wet | 10 | 1.03328992 | 1.279512 | 0.278202 | 3.87063966 | 0.85993483 | 0.96829206 | 0.88809447 | 0.02996433 | 1 |
| 2021-08-29-09-42-ADMINp | B | Wet | 09 | 1.03182829 | 2.296954 | 0.941984 | 1.83318129 | 0.94248767 | 0.98955843 | 0.95243256 | 0.0803805  | 4 |
| 2021-08-29-10-30-ADMINp | B | Wet | 10 | 1.03929011 | 0.964949 | 0.209818 | 2.75421262 | 0.88236657 | 0.97597786 | 0.90408461 | 0.06016647 | 3 |
| 2021-09-03-05-00-ADMINp | B | Wet | 05 | 1.03266357 | 1.274727 | 0.274014 | 2.30252208 | 0.85262138 | 0.9582714  | 0.88974938 | 0.00171225 | 0 |
| 2021-09-03-07-06-ADMINp | B | Wet | 07 | 1.03237803 | 2.23734  | 0.796692 | 2.78860247 | 0.91511981 | 0.98204963 | 0.9318468  | 0.08799049 | 4 |
| 2021-09-05-13-00-ADMINp | B | Wet | 13 | 1.03314191 | 2.268035 | 0.858802 | 1.37783069 | 0.95524291 | 0.98861619 | 0.96624244 | 0.01655172 | 1 |
| 2021-09-05-14-00-ADMINp | B | Wet | 14 | 1.02303902 | 2.127593 | 0.670982 | 10.4259523 | 0.78447665 | 0.97845941 | 0.80174675 | 0.23804994 | 1 |
| 2021-09-06-12-36-ADMINp | B | Wet | 12 | 1.038959   | 1.239956 | 0.264778 | 3.62614494 | 0.85112171 | 0.98078549 | 0.86779598 | 0.20508918 | 2 |
| 2021-09-07-14-00-ADMINp | B | Wet | 14 | 1.02778153 | 2.227375 | 0.781876 | 2.68316537 | 0.90017941 | 0.98391521 | 0.91489531 | 0.17407848 | 3 |
| 2021-09-08-11-54-ADMINp | B | Wet | 11 | 1.02414867 | 2.301413 | 0.973088 | 6.80582165 | 0.8467306  | 0.9912164  | 0.85423385 | 0.9588585  | 2 |
| 2021-09-10-07-00-ADMINp | B | Wet | 07 | 1.03060995 | 2.255973 | 0.829494 | 3.97466636 | 0.9328756  | 0.98573154 | 0.94637898 | 0.10016647 | 3 |
| 2021-09-10-09-42-ADMINp | B | Wet | 09 | 1.02960454 | 1.929304 | 0.530396 | 3.45905553 | 0.8433792  | 0.98658108 | 0.85485037 | 0.47300832 | 4 |
| 2021-09-11-06-06-ADMINp | B | Wet | 06 | 1.03642887 | 1.418959 | 0.319168 | 5.37839474 | 0.89852678 | 0.98382191 | 0.91330226 | 0.20485137 | 2 |
| 2021-09-11-08-12-ADMINp | B | Wet | 08 | 1.0341947  | 2.299154 | 0.953388 | 3.04473722 | 0.92176899 | 0.99039346 | 0.93070989 | 0.32627824 | 4 |
| 2021-11-27-15-42-ADMINp | B | Dry | 15 | 1.03145896 | 2.263341 | 0.840839 | 2.42260974 | 0.89484377 | 0.98745105 | 0.90621582 | 0.32532699 | 2 |

|                         |   |     |    |            |          |          |            |            |            |            |            |   |
|-------------------------|---|-----|----|------------|----------|----------|------------|------------|------------|------------|------------|---|
| 2021-11-29-14-24-ADMINp | B | Dry | 14 | 1.00553038 | 2.296574 | 0.937728 | 6.09446465 | 0.93537632 | 0.98664611 | 0.94803629 | 0.5603805  | 1 |
| 2021-11-29-15-00-ADMINp | B | Dry | 15 | 1.02901412 | 0.982363 | 0.212684 | 2.44548727 | 0.85586672 | 0.97771157 | 0.87537752 | 0.1293698  | 3 |
| 2021-12-03-17-18-ADMINp | B | Dry | 17 | 1.03569443 | 2.1059   | 0.651165 | 2.84075723 | 0.89756015 | 0.98352299 | 0.91259702 | 0.17350773 | 2 |
| 2021-12-05-05-36-ADMINp | B | Dry | 05 | 1.03291158 | 1.274649 | 0.276371 | 1.90793117 | 0.89178084 | 0.97472119 | 0.91490864 | 0.02825208 | 0 |
| 2021-12-05-08-12-ADMINp | B | Dry | 08 | 1.02581491 | 1.171894 | 0.249703 | 1.9143636  | 0.90860185 | 0.98103213 | 0.92616931 | 0.07876338 | 3 |
| 2021-12-07-12-06-ADMINp | B | Dry | 12 | 1.03032735 | 1.476227 | 0.331887 | 3.32762975 | 0.87506866 | 0.98097635 | 0.89203849 | 0.16908442 | 2 |
| 2021-12-09-16-36-ADMINp | B | Dry | 16 | 1.02675828 | 1.125547 | 0.242151 | 4.62048135 | 0.83348538 | 0.97485608 | 0.85498301 | 0.10482759 | 1 |
| 2021-12-12-16-18-ADMINp | B | Dry | 16 | 1.02686147 | 1.595474 | 0.374774 | 1.80185035 | 0.91050192 | 0.98426282 | 0.92505975 | 0.11985731 | 1 |
| 2021-12-13-07-18-ADMINp | B | Dry | 07 | 1.02527917 | 2.295468 | 0.932304 | 3.25710529 | 0.92324393 | 0.98829158 | 0.93418172 | 0.27995244 | 2 |
| 2021-12-13-13-42-ADMINp | B | Dry | 13 | 1.02728362 | 1.714289 | 0.422401 | 4.70681526 | 0.8756178  | 0.98732694 | 0.88685699 | 0.4463258  | 1 |
| 2021-12-30-05-18-ADMINp | B | Dry | 05 | 1.03596901 | 2.302218 | 0.986748 | 3.90739305 | 0.97585813 | 0.99090605 | 0.98481399 | 0.01360285 | 0 |
| 2021-12-30-13-00-ADMINp | B | Dry | 13 | 1.03344491 | 2.27467  | 0.868575 | 1.71008389 | 0.93643249 | 0.98806527 | 0.94774355 | 0.09160523 | 2 |
| 2022-01-03-07-30-ADMINp | B | Dry | 07 | 1.02107527 | 2.286038 | 0.900568 | 2.33140805 | 0.92074495 | 0.98779994 | 0.93211683 | 0.27434007 | 4 |
| 2022-01-03-11-06-ADMINp | B | Dry | 11 | 1.02279791 | 2.152257 | 0.692188 | 2.14650752 | 0.90586285 | 0.98812068 | 0.91675326 | 0.36470868 | 2 |
| 2022-01-03-16-24-ADMINp | B | Dry | 16 | 1.02529416 | 1.858823 | 0.497623 | 2.13878218 | 0.8999555  | 0.9816979  | 0.91673365 | 0.14449465 | 2 |
| 2022-01-06-09-18-ADMINp | B | Dry | 09 | 1.02187427 | 2.268546 | 0.852377 | 3.3222997  | 0.87009895 | 0.98791829 | 0.88073979 | 0.49959572 | 3 |
| 2022-01-06-14-36-ADMINp | B | Dry | 14 | 1.02793631 | 2.301672 | 0.976326 | 1.7870071  | 0.92030571 | 0.9902065  | 0.92940786 | 0.33883472 | 3 |
| 2022-01-09-11-54-ADMINp | B | Dry | 11 | 1.03364436 | 2.292662 | 0.921806 | 1.73039358 | 0.95363632 | 0.98989662 | 0.96336962 | 0.04494649 | 2 |
| 2022-01-10-05-00-ADMINp | B | Dry | 05 | 1.02903841 | 2.239846 | 0.809701 | 3.04007337 | 0.92830584 | 0.98635601 | 0.94114684 | 0.08580262 | 0 |
| 2022-01-11-06-42-ADMINp | B | Dry | 06 | 1.01981345 | 1.784423 | 0.473819 | 3.18601506 | 0.91925357 | 0.97514903 | 0.94268008 | 0.03995244 | 4 |
| 2022-01-14-05-36-ADMINp | B | Dry | 05 | 1.03283902 | 2.243641 | 0.811899 | 2.88064927 | 0.94574881 | 0.98845255 | 0.95679738 | 0.0591201  | 0 |
| 2022-01-15-05-00-ADMINp | B | Dry | 05 | 1.03761326 | 2.300309 | 0.965199 | 3.36762062 | 0.97468295 | 0.98999427 | 0.98453393 | 0.00646849 | 0 |
| 2022-01-18-17-18-ADMINp | B | Dry | 17 | 1.02617675 | 2.161455 | 0.709221 | 2.17094336 | 0.91218393 | 0.98644528 | 0.92471822 | 0.20375743 | 1 |
| 2022-01-19-06-30-ADMINp | B | Dry | 06 | 1.03419648 | 2.293372 | 0.924807 | 2.05986233 | 0.93971722 | 0.98680709 | 0.95228057 | 0.07196195 | 3 |
| 2022-01-20-18-00-ADMINp | B | Dry | 18 | 1.03404019 | 1.575127 | 0.367551 | 2.57993694 | 0.92959969 | 0.98409941 | 0.94461969 | 0.04718193 | 0 |
| 2022-01-22-08-24-ADMINp | B | Dry | 08 | 1.02689763 | 2.276465 | 0.872019 | 2.35361493 | 0.93613894 | 0.98878035 | 0.94676127 | 0.15714625 | 3 |
| 2022-01-23-06-12-ADMINp | B | Dry | 06 | 1.03216669 | 2.298942 | 0.952728 | 2.13843205 | 0.92377163 | 0.98919363 | 0.9338633  | 0.20142687 | 1 |
| 2022-01-26-14-36-ADMINp | B | Dry | 14 | 1.02939558 | 2.294074 | 0.925851 | 2.12384    | 0.88844894 | 0.98963972 | 0.89774988 | 0.5046849  | 1 |

|                         |   |     |    |            |          |          |            |            |            |            |            |   |
|-------------------------|---|-----|----|------------|----------|----------|------------|------------|------------|------------|------------|---|
| 2022-01-26-15-36-ADMINp | B | Dry | 15 | 1.01933024 | 1.684876 | 0.438795 | 6.40146882 | 0.84511452 | 0.98839052 | 0.8550411  | 0.72722949 | 0 |
| 2022-01-27-12-00-ADMINp | B | Dry | 12 | 1.02883029 | 2.212516 | 0.759878 | 2.7765593  | 0.84808806 | 0.98985846 | 0.8567771  | 0.77117717 | 2 |
| 2022-01-28-11-12-ADMINp | B | Dry | 11 | 1.0307518  | 1.968501 | 0.54927  | 2.46324563 | 0.84770678 | 0.98931588 | 0.8568616  | 0.66617123 | 2 |
| 2020-12-18-12-24-CSLIBp | C | Dry | 12 | 1.04237493 | 1.53917  | 0.350917 | 14.8161972 | 0.83556237 | 0.96677502 | 0.864278   | 0.22479167 | 3 |
| 2020-12-19-15-06-CSLIBp | C | Dry | 15 | 1.01989793 | 1.794003 | 0.498793 | 9.26592471 | 0.88964774 | 0.9703617  | 0.91682075 | 0.19333333 | 1 |
| 2020-12-23-12-24-CSLIBp | C | Dry | 12 | 1.0104376  | 0.37212  | 0.127308 | 12.1310594 | 0.69721843 | 0.96859255 | 0.71982634 | 0.22493056 | 4 |
| 2020-12-27-05-18-CSLIBp | C | Dry | 05 | 1.01704273 | 1.92039  | 0.532144 | 7.81081629 | 0.89637026 | 0.98751046 | 0.90770711 | 0.18368056 | 1 |
| 2020-12-27-15-06-CSLIBp | C | Dry | 15 | 1.02403037 | 1.575613 | 0.407195 | 14.9732809 | 0.8646199  | 0.94944622 | 0.91065706 | 0.01319444 | 3 |
| 2020-12-27-16-06-CSLIBp | C | Dry | 16 | 1.01861925 | 1.495331 | 0.405607 | 7.56014191 | 0.85243441 | 0.95780606 | 0.88998645 | 0.01833333 | 4 |
| 2020-12-30-05-48-CSLIBp | C | Dry | 05 | 1.01979256 | 1.679684 | 0.406005 | 18.7969129 | 0.82598859 | 0.98496165 | 0.83859975 | 0.6        | 1 |
| 2021-01-07-06-54-CSLIBp | C | Dry | 06 | 1.08092062 | 1.566616 | 0.363185 | 16.5906718 | 0.82016136 | 0.95210461 | 0.86141938 | 0.12375    | 5 |
| 2021-01-13-05-42-CSLIBp | C | Dry | 05 | 1.00510087 | 0.582791 | 0.15787  | 10.2690679 | 0.80550602 | 0.96542173 | 0.83435663 | 0.07291667 | 1 |
| 2021-01-14-16-48-CSLIBp | C | Dry | 16 | 1.01682324 | 0.909467 | 0.209297 | 11.7765653 | 0.80331714 | 0.97543082 | 0.82355111 | 0.22819444 | 3 |
| 2021-01-16-06-54-CSLIBp | C | Dry | 06 | 1.07820373 | 1.744426 | 0.440224 | 14.6931591 | 0.84809776 | 0.94516014 | 0.89730589 | 0.06354167 | 6 |
| 2021-01-18-15-30-CSLIBp | C | Dry | 15 | 0.99596296 | 1.216715 | 0.282041 | 9.56560998 | 0.85638441 | 0.98254969 | 0.871594   | 0.12638889 | 2 |
| 2021-01-20-14-54-CSLIBp | C | Dry | 14 | 1.00052743 | 0.822029 | 0.185281 | 11.4177875 | 0.81213759 | 0.98372861 | 0.82557078 | 0.048125   | 2 |
| 2021-01-26-13-30-CSLIBp | C | Dry | 13 | 1.00532657 | 0.697879 | 0.160732 | 10.5687452 | 0.76280822 | 0.98420374 | 0.77505112 | 0.39722222 | 6 |
| 2021-01-28-09-18-CSLIBp | C | Dry | 09 | 1.06810609 | 2.027305 | 0.594213 | 15.5770408 | 0.82856888 | 0.91442009 | 0.90611404 | 0.021875   | 5 |
| 2021-01-28-14-30-CSLIBp | C | Dry | 14 | 0.99787981 | 0.691167 | 0.175124 | 5.20552438 | 0.83436229 | 0.96653614 | 0.86324997 | 0.19791667 | 2 |
| 2021-01-30-07-00-CSLIBp | C | Dry | 07 | 1.01460124 | 1.527482 | 0.381886 | 6.2069178  | 0.8067589  | 0.95069349 | 0.84860042 | 0.09722222 | 7 |
| 2021-01-31-07-42-CSLIBp | C | Dry | 07 | 0.99689587 | 1.558348 | 0.389273 | 18.3546604 | 0.84247267 | 0.95082309 | 0.88604565 | 0.06270833 | 4 |
| 2021-02-02-08-54-CSLIBp | C | Dry | 08 | 1.00430462 | 0.860294 | 0.208238 | 12.8839023 | 0.7945221  | 0.96341626 | 0.82469244 | 0.14423611 | 7 |
| 2021-02-02-13-30-CSLIBp | C | Dry | 13 | 1.00708388 | 0.829031 | 0.19061  | 14.2029602 | 0.78980684 | 0.97767522 | 0.80784173 | 0.17472222 | 3 |
| 2021-02-03-10-00-CSLIBp | C | Dry | 10 | 1.0657296  | 1.236174 | 0.28581  | 14.2351634 | 0.78394265 | 0.92697592 | 0.84569904 | 0.04277778 | 3 |
| 2021-02-05-17-54-CSLIBp | C | Dry | 17 | 1.00534438 | 1.492288 | 0.357758 | 11.3081755 | 0.83759736 | 0.98412749 | 0.85110656 | 0.13590278 | 1 |
| 2021-02-18-11-54-CSLIBp | C | Dry | 11 | 1.00258618 | 0.642757 | 0.167226 | 5.77807179 | 0.80199062 | 0.97672815 | 0.82109912 | 0.15347222 | 3 |
| 2021-02-20-09-30-CSLIBp | C | Dry | 09 | 1.00537007 | 0.447445 | 0.138728 | 14.4206618 | 0.75379428 | 0.96488292 | 0.78122876 | 0.06138889 | 7 |
| 2021-02-25-10-54-CSLIBp | C | Dry | 10 | 1.00161085 | 0.493121 | 0.143222 | 13.9252764 | 0.77362601 | 0.97368002 | 0.79453825 | 0.16041667 | 4 |

|                         |   |     |    |            |          |          |            |            |            |            |            |   |
|-------------------------|---|-----|----|------------|----------|----------|------------|------------|------------|------------|------------|---|
| 2021-02-25-18-42-CSLIBp | C | Dry | 18 | 1.00073332 | 1.665678 | 0.433587 | 12.0802565 | 0.79120877 | 0.98841339 | 0.80048367 | 0.7375     | 1 |
| 2021-03-01-06-36-CSLIBp | C | Dry | 06 | 1.0120457  | 1.466178 | 0.339469 | 12.5422383 | 0.83596198 | 0.97130889 | 0.86065513 | 0.24083333 | 5 |
| 2021-03-02-10-00-CSLIBp | C | Dry | 10 | 0.99395903 | 0.901302 | 0.210307 | 18.166129  | 0.71260004 | 0.946373   | 0.7529801  | 0.08145833 | 2 |
| 2021-03-03-08-36-CSLIBp | C | Dry | 08 | 1.03873791 | 1.504908 | 0.353908 | 18.7871664 | 0.85464412 | 0.96370906 | 0.88682795 | 0.11333333 | 4 |
| 2021-03-03-15-48-CSLIBp | C | Dry | 15 | 1.01116264 | 0.630538 | 0.15812  | 16.4639792 | 0.67823751 | 0.93167125 | 0.72797944 | 0.04       | 5 |
| 2021-03-05-18-48-CSLIBp | C | Dry | 18 | 1.00261585 | 1.388911 | 0.310962 | 11.0664679 | 0.79586054 | 0.98378553 | 0.80897768 | 0.36111111 | 1 |
| 2021-03-06-09-06-CSLIBp | C | Dry | 09 | 1.00040252 | 1.134477 | 0.241964 | 12.732527  | 0.8208778  | 0.98322688 | 0.83488136 | 0.3        | 6 |
| 2021-03-07-16-48-CSLIBp | C | Dry | 16 | 1.00468166 | 0.132756 | 0.10851  | 11.6671429 | 0.70052521 | 0.96193235 | 0.72824789 | 0.10416667 | 6 |
| 2021-03-16-14-24-CSLIBp | C | Dry | 14 | 1.00406575 | 0.447462 | 0.130977 | 10.6386921 | 0.73436856 | 0.97019617 | 0.75692791 | 0.17888889 | 6 |
| 2021-03-20-13-30-CSLIBp | C | Dry | 13 | 1.00042129 | 0.780916 | 0.185635 | 14.7283113 | 0.81828151 | 0.98235709 | 0.83297766 | 0.01875    | 7 |
| 2021-03-22-14-24-CSLIBp | C | Dry | 14 | 1.02408694 | 1.418441 | 0.323072 | 5.95595784 | 0.63464377 | 0.87829184 | 0.72258871 | 0.00527778 | 4 |
| 2021-03-23-06-00-CSLIBp | C | Dry | 06 | 0.9891453  | 1.368105 | 0.319096 | 12.6189167 | 0.82597884 | 0.9662258  | 0.85485074 | 0.16958333 | 5 |
| 2021-03-28-17-30-CSLIBp | C | Dry | 17 | 1.01932765 | 1.214307 | 0.279209 | 15.8940798 | 0.80150486 | 0.97490364 | 0.82213752 | 0.19583333 | 1 |
| 2021-04-02-14-06-CSLIBp | C | Dry | 14 | 1.00475608 | 0.25274  | 0.118675 | 13.2989859 | 0.71025369 | 0.94108425 | 0.7547185  | 0.00666667 | 4 |
| 2021-04-07-08-24-CSLIBp | C | Dry | 08 | 1.00751665 | 0.624099 | 0.158296 | 9.73142588 | 0.77208873 | 0.96696076 | 0.79846955 | 0.08611111 | 3 |
| 2021-04-15-13-00-CSLIBp | C | Dry | 13 | 0.99749658 | 0.625388 | 0.152612 | 12.6207854 | 0.79073974 | 0.98341787 | 0.80407298 | 0.19055556 | 4 |
| 2021-04-22-17-18-CSLIBp | C | Dry | 17 | 1.05301586 | 1.737294 | 0.491487 | 17.283276  | 0.77206125 | 0.98034811 | 0.78753786 | 0.53083333 | 1 |
| 2021-04-26-17-18-CSLIBp | C | Dry | 17 | 1.05559883 | 1.777443 | 0.491578 | 18.7802412 | 0.79943203 | 0.97425817 | 0.8205546  | 0.36020833 | 0 |
| 2021-04-29-08-00-CSLIBp | C | Dry | 08 | 0.98589574 | 1.586351 | 0.381348 | 13.5125161 | 0.8592409  | 0.98390259 | 0.87329875 | 0.14875    | 5 |
| 2021-05-01-12-48-CSLIBp | C | Wet | 12 | 0.9466449  | 1.717465 | 0.47769  | 10.9961573 | 0.81910977 | 0.98083168 | 0.83511757 | 0.55409722 | 4 |
| 2021-05-02-11-18-CSLIBp | C | Wet | 11 | 0.9780161  | 1.960159 | 0.544633 | 12.9034277 | 0.87891387 | 0.9616952  | 0.91392145 | 0.091875   | 5 |
| 2021-05-08-09-06-CSLIBp | C | Wet | 09 | 0.97347226 | 1.790105 | 0.51521  | 16.4878647 | 0.79817656 | 0.98184149 | 0.81293831 | 0.64777778 | 5 |
| 2021-05-11-08-24-CSLIBp | C | Wet | 08 | 1.02829199 | 2.039141 | 0.619886 | 17.2425087 | 0.86189847 | 0.97437565 | 0.88456487 | 0.47118056 | 2 |
| 2021-05-12-09-54-CSLIBp | C | Wet | 09 | 0.9884864  | 1.931411 | 0.566573 | 19.6238603 | 0.81205352 | 0.97840213 | 0.82997931 | 0.55222222 | 3 |
| 2021-05-16-13-18-CSLIBp | C | Wet | 13 | 0.98275187 | 1.559615 | 0.371231 | 8.77770301 | 0.82506433 | 0.97901531 | 0.84274916 | 0.5        | 3 |
| 2021-05-17-16-54-CSLIBp | C | Wet | 16 | 1.06019193 | 0.953008 | 0.209118 | 15.0035108 | 0.70271235 | 0.9564142  | 0.73473643 | 0.14694444 | 1 |
| 2021-05-21-07-18-CSLIBp | C | Wet | 07 | 0.99323067 | 1.985866 | 0.61575  | 20.0580785 | 0.81114076 | 0.98315509 | 0.82503846 | 0.76527778 | 3 |
| 2021-05-22-15-42-CSLIBp | C | Wet | 15 | 1.00241213 | 1.109523 | 0.244198 | 10.592636  | 0.8461402  | 0.98459908 | 0.85937537 | 0.02944444 | 6 |

|                         |   |     |    |            |          |          |            |            |            |            |            |   |
|-------------------------|---|-----|----|------------|----------|----------|------------|------------|------------|------------|------------|---|
| 2021-05-30-06-24-CSLIBp | C | Wet | 06 | 0.99589821 | 2.027371 | 0.65404  | 20.8273871 | 0.8024116  | 0.98491214 | 0.81470373 | 0.869375   | 4 |
| 2021-06-02-11-48-CSLIBp | C | Wet | 11 | 1.00578775 | 1.247151 | 0.320419 | 4.65384421 | 0.81130978 | 0.94928162 | 0.85465657 | 0.10625    | 1 |
| 2021-06-12-07-36-CSLIBp | C | Wet | 07 | 1.00103652 | 1.845197 | 0.536047 | 15.7176054 | 0.82831595 | 0.98595123 | 0.84011858 | 0.87888889 | 1 |
| 2021-06-16-12-24-CSLIBp | C | Wet | 12 | 0.97386855 | 2.122394 | 0.695383 | 12.8697975 | 0.81981622 | 0.98427189 | 0.83291642 | 0.75833333 | 2 |
| 2021-06-18-11-24-CSLIBp | C | Wet | 11 | 0.97815211 | 1.928315 | 0.565763 | 12.2333402 | 0.81843033 | 0.97818595 | 0.83668175 | 0.46666667 | 4 |
| 2021-06-20-07-48-CSLIBp | C | Wet | 07 | 0.97184318 | 1.836212 | 0.51881  | 19.8180974 | 0.82799716 | 0.98267197 | 0.84259772 | 0.64625    | 3 |
| 2021-06-23-12-06-CSLIBp | C | Wet | 12 | 0.97987659 | 1.91148  | 0.550131 | 11.430856  | 0.84427129 | 0.98138622 | 0.86028444 | 0.61625    | 2 |
| 2021-06-25-18-00-CSLIBp | C | Wet | 18 | 1.04013023 | 1.619795 | 0.388036 | 16.4296327 | 0.70739023 | 0.97252018 | 0.72737846 | 0.35701389 | 1 |
| 2021-06-25-18-24-CSLIBp | C | Wet | 18 | 1.03871749 | 1.68514  | 0.415518 | 18.3988734 | 0.72719303 | 0.97401614 | 0.74659238 | 0.36555556 | 2 |
| 2021-07-04-10-12-CSLIBp | C | Wet | 10 | 0.97115957 | 1.716949 | 0.456073 | 16.2737986 | 0.80877097 | 0.97799811 | 0.82696578 | 0.503125   | 3 |
| 2021-07-09-05-48-CSLIBp | C | Wet | 05 | 0.95579356 | 1.730164 | 0.467001 | 15.2801975 | 0.81515489 | 0.98379426 | 0.82858268 | 0.75048611 | 5 |
| 2021-07-10-11-36-CSLIBp | C | Wet | 11 | 0.97337988 | 1.695158 | 0.456011 | 9.51269197 | 0.83118081 | 0.96090964 | 0.86499372 | 0.15166667 | 5 |
| 2021-07-13-16-42-CSLIBp | C | Wet | 16 | 1.05117877 | 1.115634 | 0.259984 | 16.096704  | 0.77069546 | 0.970316   | 0.79427265 | 0.23826389 | 1 |
| 2021-07-20-18-12-CSLIBp | C | Wet | 18 | 1.0219625  | 1.136625 | 0.241442 | 10.1741101 | 0.83610947 | 0.97939472 | 0.85370021 | 0.045625   | 1 |
| 2021-07-22-05-36-CSLIBp | C | Wet | 05 | 1.00596307 | 1.049944 | 0.23087  | 17.5257556 | 0.83960363 | 0.98329941 | 0.85386366 | 0.16166667 | 6 |
| 2021-09-02-10-54-CSLIBp | C | Wet | 10 | 0.99156766 | 1.997168 | 0.608217 | 16.7873791 | 0.80353416 | 0.98858534 | 0.81281213 | 0.97513889 | 1 |
| 2021-09-05-17-30-CSLIBp | C | Wet | 17 | 1.00174794 | 0.291104 | 0.121095 | 8.2068128  | 0.77444431 | 0.98123062 | 0.7892582  | 0.08987847 | 0 |
| 2020-12-22-14-00-CSLIBp | C | Dry | 14 | 1.00470809 | 0.357011 | 0.122017 | 5.55857247 | 0.70465777 | 0.96057196 | 0.73358145 | 0.09234948 | 1 |
| 2021-01-26-14-36-CSLIBp | C | Dry | 14 | 1.00413656 | 1.267608 | 0.334567 | 10.1605068 | 0.81705142 | 0.96005418 | 0.8510472  | 0.10140335 | 4 |
| 2021-02-10-10-42-CSLIBp | C | Dry | 10 | 1.00836439 | 0.848034 | 0.202555 | 7.57430041 | 0.72492687 | 0.94868869 | 0.76413567 | 0.05387053 | 5 |
| 2021-02-14-10-54-CSLIBp | C | Dry | 10 | 1.00543977 | 0.424034 | 0.136764 | 11.9114292 | 0.79784559 | 0.96509527 | 0.82670138 | 0.02987777 | 5 |
| 2021-03-03-07-00-CSLIBp | C | Dry | 07 | 0.99648137 | 1.479685 | 0.344519 | 15.1038141 | 0.8051883  | 0.97871578 | 0.82269881 | 0.34857402 | 5 |
| 2021-03-11-12-00-CSLIBp | C | Dry | 12 | 1.01479824 | 1.04525  | 0.239576 | 9.31848805 | 0.67409284 | 0.93484335 | 0.72107572 | 0.03802626 | 6 |
| 2021-03-11-13-24-CSLIBp | C | Dry | 13 | 1.0270166  | 0.777108 | 0.17278  | 9.53432502 | 0.61058024 | 0.92059381 | 0.66324609 | 0.01448619 | 2 |
| 2021-03-12-17-00-CSLIBp | C | Dry | 17 | 1.01273006 | 0.830457 | 0.205846 | 10.5558676 | 0.65007559 | 0.92322129 | 0.70413842 | 0.00995926 | 4 |
| 2021-03-14-13-00-CSLIBp | C | Dry | 13 | 1.00458906 | 1.097521 | 0.258594 | 11.3547286 | 0.82324517 | 0.97526804 | 0.84412197 | 0.07243096 | 5 |
| 2021-03-31-16-48-CSLIBp | C | Dry | 16 | 1.03425675 | 0.707063 | 0.161907 | 10.7176633 | 0.59021869 | 0.9328849  | 0.63268115 | 0.0421005  | 3 |
| 2021-04-10-09-30-CSLIBp | C | Dry | 09 | 1.03863754 | 1.257668 | 0.282737 | 15.0783562 | 0.75169147 | 0.94137159 | 0.79850664 | 0.03621548 | 7 |

|                         |   |     |    |            |          |          |            |            |            |            |            |   |
|-------------------------|---|-----|----|------------|----------|----------|------------|------------|------------|------------|------------|---|
| 2021-04-16-15-36-CSLIBp | C | Dry | 15 | 1.02030377 | 0.831578 | 0.205846 | 8.151222   | 0.77481779 | 0.9686498  | 0.79989465 | 0.19782707 | 5 |
| 2021-05-06-08-00-CSLIBp | C | Wet | 08 | 0.98065378 | 1.756982 | 0.456113 | 12.6000851 | 0.82601535 | 0.96105016 | 0.85949245 | 0.1955636  | 5 |
| 2021-05-23-05-30-CSLIBp | C | Wet | 05 | 0.99939532 | 2.069613 | 0.669207 | 20.2083959 | 0.80586776 | 0.98518428 | 0.81798683 | 0.9578995  | 4 |
| 2021-05-25-11-06-CSLIBp | C | Wet | 11 | 0.98717206 | 2.10682  | 0.689761 | 18.296439  | 0.81542608 | 0.98112768 | 0.83111108 | 0.6364871  | 4 |
| 2021-06-04-09-06-CSLIBp | C | Wet | 09 | 0.99389234 | 2.149198 | 0.740846 | 17.8687749 | 0.81199432 | 0.98320861 | 0.82586168 | 0.79447714 | 4 |
| 2021-06-23-16-36-CSLIBp | C | Wet | 16 | 0.98719496 | 2.128048 | 0.75166  | 21.7555628 | 0.83800416 | 0.98953747 | 0.84686451 | 0.80851064 | 0 |
| 2021-07-09-08-00-CSLIBp | C | Wet | 08 | 0.99938397 | 2.102578 | 0.652728 | 10.8528361 | 0.84763956 | 0.97134287 | 0.87264712 | 0.36939792 | 2 |
| 2021-07-13-06-48-CSLIBp | C | Wet | 06 | 0.97866877 | 2.003138 | 0.602133 | 10.6962106 | 0.82735925 | 0.97721568 | 0.84664959 | 0.49298325 | 3 |
| 2021-07-15-05-06-CSLIBp | C | Wet | 05 | 0.96595366 | 1.739799 | 0.434225 | 6.25907338 | 0.8073944  | 0.97450287 | 0.82851926 | 0.40697148 | 5 |
| 2021-07-23-18-48-CSLIBp | C | Wet | 18 | 1.00522402 | 1.012215 | 0.221197 | 6.51513218 | 0.84371539 | 0.95576675 | 0.88276286 | 0.16296967 | 0 |
| 2021-08-07-06-06-CSLIBp | C | Wet | 06 | 0.99972136 | 2.080137 | 0.633412 | 6.46721448 | 0.85880656 | 0.96275365 | 0.89203148 | 0.12901766 | 5 |
| 2021-08-09-14-54-CSLIBp | C | Wet | 14 | 1.00045972 | 0.148747 | 0.10768  | 7.38295643 | 0.79999411 | 0.98002013 | 0.81630376 | 0.01674966 | 1 |
| 2021-08-29-17-18-CSLIBp | C | Wet | 17 | 1.05271106 | 1.393401 | 0.326658 | 12.150791  | 0.73171021 | 0.97843149 | 0.74784001 | 0.40018108 | 0 |
| 2021-09-19-10-24-CSLIBp | C | Wet | 10 | 0.98706188 | 2.027188 | 0.588963 | 10.850565  | 0.83006406 | 0.95239023 | 0.87155878 | 0.08329561 | 2 |
| 2021-09-21-11-18-CSLIBp | C | Wet | 11 | 0.98703148 | 2.015019 | 0.595765 | 15.8042962 | 0.81331101 | 0.95695355 | 0.84989602 | 0.22815754 | 0 |
| 2021-10-15-07-12-CSLIBp | C | Wet | 07 | 1.00324203 | 1.619728 | 0.434806 | 14.4440509 | 0.85032811 | 0.95532487 | 0.89009314 | 0.08963332 | 4 |
| 2021-11-17-16-00-CSLIBp | C | Dry | 16 | 1.007595   | 0.316895 | 0.122785 | 7.91169724 | 0.67221819 | 0.95588401 | 0.70324242 | 0.04708013 | 0 |
| 2021-11-18-12-06-CSLIBp | C | Dry | 12 | 1.01893985 | 0.525798 | 0.143963 | 11.7043165 | 0.62465274 | 0.94337947 | 0.66214366 | 0.05432322 | 0 |
| 2021-12-03-12-18-CSLIBp | C | Dry | 12 | 1.00755582 | 0.394876 | 0.144419 | 3.68170056 | 0.74937868 | 0.97166546 | 0.77123116 | 0.08239022 | 0 |
| 2021-12-07-07-48-CSLIBp | C | Dry | 07 | 1.00855284 | 0.494181 | 0.147678 | 14.3046828 | 0.7738116  | 0.97189482 | 0.79618862 | 0.15889543 | 3 |
| 2021-12-18-05-30-CSLIBp | C | Dry | 05 | 1.02275162 | 0.945079 | 0.218724 | 15.0779778 | 0.66965568 | 0.95471733 | 0.70141775 | 0.12222725 | 5 |
| 2022-01-08-15-36-CSLIBp | C | Dry | 15 | 1.00875186 | 1.028107 | 0.231159 | 12.5245928 | 0.78343184 | 0.96382702 | 0.81283449 | 0.09506564 | 1 |
| 2022-01-18-17-42-CSLIBp | C | Dry | 17 | 1.00634365 | 1.433158 | 0.335548 | 10.5768476 | 0.79431974 | 0.9736226  | 0.81583947 | 0.12222725 | 1 |
| 2022-01-28-13-00-CSLIBp | C | Dry | 13 | 1.03711432 | 1.131898 | 0.273317 | 14.445949  | 0.70429975 | 0.97354106 | 0.72344124 | 0.45948393 | 2 |
| 2022-01-31-18-06-CSLIBp | C | Dry | 18 | 1.02743842 | 1.786018 | 0.472422 | 17.0212374 | 0.87264943 | 0.97968065 | 0.89074887 | 0.06518787 | 0 |
| 2021-01-04-18-00-CSLIBp | C | Dry | 18 | 1.01244069 | 1.064321 | 0.22978  | 11.340546  | 0.82908961 | 0.98175118 | 0.84450075 | 0.32132964 | 1 |
| 2021-02-05-05-18-CSLIBp | C | Dry | 05 | 1.00619811 | 1.295319 | 0.283907 | 15.0601026 | 0.82775476 | 0.98169132 | 0.84319251 | 0.19390582 | 0 |
| 2021-02-16-13-06-CSLIBp | C | Dry | 13 | 1.00579596 | 0.40048  | 0.127853 | 10.5500826 | 0.72355437 | 0.978953   | 0.73911043 | 0.27423823 | 3 |



|                         |   |     |    |            |          |          |            |            |            |            |            |   |
|-------------------------|---|-----|----|------------|----------|----------|------------|------------|------------|------------|------------|---|
| 2021-03-01-10-12-CSLIBp | C | Dry | 10 | 1.00578725 | 0.890464 | 0.216307 | 9.95673916 | 0.81164294 | 0.97224405 | 0.83481399 | 0.15512465 | 6 |
| 2021-03-07-14-36-CSLIBp | C | Dry | 14 | 1.02591692 | 0.330387 | 0.120039 | 6.84438047 | 0.60739672 | 0.94874587 | 0.64021014 | 0.03739612 | 2 |
| 2021-03-18-12-24-CSLIBp | C | Dry | 12 | 0.99917269 | 0.62638  | 0.159688 | 13.4021811 | 0.76949217 | 0.97858923 | 0.78632806 | 0.13088643 | 4 |
| 2021-03-22-08-42-CSLIBp | C | Dry | 08 | 1.00822085 | 1.329203 | 0.329323 | 8.60583536 | 0.85984062 | 0.97917542 | 0.87812726 | 0.03185596 | 6 |
| 2021-03-26-07-36-CSLIBp | C | Dry | 07 | 0.99269355 | 0.715662 | 0.18181  | 14.167901  | 0.81521156 | 0.97200891 | 0.83868734 | 0.06232687 | 3 |
| 2021-03-27-06-36-CSLIBp | C | Dry | 06 | 1.00111316 | 0.83228  | 0.183379 | 11.4199927 | 0.80161518 | 0.98095945 | 0.81717464 | 0.05609418 | 3 |
| 2021-03-27-17-12-CSLIBp | C | Dry | 17 | 1.02713605 | 1.037312 | 0.225876 | 9.21808992 | 0.78679975 | 0.97436834 | 0.80749725 | 0.29432133 | 2 |
| 2021-04-01-15-00-CSLIBp | C | Dry | 15 | 1.04678537 | 0.42884  | 0.129803 | 8.36816046 | 0.51034589 | 0.90654482 | 0.56295715 | 0.01800554 | 2 |
| 2021-04-04-15-06-CSLIBp | C | Dry | 15 | 1.00238758 | 1.564095 | 0.373092 | 17.7160168 | 0.82266232 | 0.95618652 | 0.86035757 | 0.03047091 | 4 |
| 2021-05-04-08-06-CSLIBp | C | Wet | 08 | 0.95647269 | 1.662635 | 0.409459 | 10.8125316 | 0.82138323 | 0.9793025  | 0.83874312 | 0.48199446 | 3 |
| 2021-06-02-16-18-CSLIBp | C | Wet | 16 | 1.01866464 | 1.142185 | 0.272392 | 14.4001605 | 0.71465005 | 0.97766991 | 0.73097273 | 0.4432133  | 3 |
| 2021-06-04-05-06-CSLIBp | C | Wet | 05 | 1.00963131 | 2.038257 | 0.657041 | 19.4064395 | 0.80996644 | 0.98583026 | 0.82160842 | 0.92105263 | 0 |
| 2021-06-06-11-24-CSLIBp | C | Wet | 11 | 0.99404186 | 1.648092 | 0.43936  | 17.8738176 | 0.80899913 | 0.98481954 | 0.82146942 | 0.77700831 | 3 |
| 2021-06-25-14-42-CSLIBp | C | Wet | 14 | 1.00466314 | 1.570264 | 0.410703 | 6.71983496 | 0.86255172 | 0.97129598 | 0.8880421  | 0.14542936 | 3 |
| 2021-07-15-10-00-CSLIBp | C | Wet | 10 | 0.99515711 | 2.252604 | 0.828078 | 6.70377406 | 0.86751292 | 0.98516605 | 0.88057533 | 0.82409972 | 0 |
| 2021-07-21-13-06-CSLIBp | C | Wet | 13 | 1.00043697 | 2.187373 | 0.758294 | 7.19670141 | 0.89229108 | 0.98713512 | 0.9039199  | 0.79432133 | 2 |
| 2021-08-01-06-48-CSLIBp | C | Wet | 06 | 0.99880339 | 0.871277 | 0.206672 | 16.3079499 | 0.817846   | 0.96877895 | 0.84420291 | 0.06301939 | 4 |
| 2021-08-13-11-00-CSLIBp | C | Wet | 11 | 0.99081587 | 2.087854 | 0.691795 | 24.6876832 | 0.80071242 | 0.98619643 | 0.81191981 | 0.89750693 | 0 |
| 2021-08-15-15-36-CSLIBp | C | Wet | 15 | 1.01296927 | 0.966388 | 0.214193 | 6.66564754 | 0.78626101 | 0.98000219 | 0.80230536 | 0.13850416 | 0 |
| 2021-08-29-06-36-CSLIBp | C | Wet | 06 | 1.0035274  | 0.35069  | 0.144001 | 13.1866433 | 0.75795473 | 0.97683789 | 0.77592684 | 0.06578947 | 3 |
| 2021-08-31-09-00-CSLIBp | C | Wet | 09 | 0.99360089 | 1.085249 | 0.22912  | 12.5002794 | 0.72456227 | 0.96150433 | 0.75357151 | 0.25138504 | 2 |
| 2021-09-01-09-00-CSLIBp | C | Wet | 09 | 0.99407544 | 1.979934 | 0.590551 | 23.4259929 | 0.79427419 | 0.98780528 | 0.80407971 | 0.97368421 | 0 |
| 2021-09-12-18-00-CSLIBp | C | Wet | 18 | 1.00868195 | 1.053583 | 0.244081 | 16.0140668 | 0.72677073 | 0.97506209 | 0.74535841 | 0.34903047 | 0 |
| 2021-09-16-16-54-CSLIBp | C | Wet | 16 | 1.00801728 | 1.859894 | 0.527489 | 6.28239148 | 0.8806137  | 0.98398372 | 0.89494743 | 0.3767313  | 0 |
| 2021-10-04-08-42-CSLIBp | C | Wet | 08 | 0.99936049 | 2.073074 | 0.650906 | 8.54415348 | 0.84112544 | 0.95051114 | 0.88491907 | 0.06232687 | 0 |
| 2021-10-09-17-12-CSLIBp | C | Wet | 17 | 1.01016678 | 1.284083 | 0.288706 | 9.44667991 | 0.83096925 | 0.98034614 | 0.84762842 | 0.01800554 | 1 |
| 2021-10-17-12-18-CSLIBp | C | Wet | 12 | 1.00630641 | 1.095985 | 0.24599  | 10.7822851 | 0.81631263 | 0.98210948 | 0.83118293 | 0.08310249 | 0 |
| 2021-10-19-18-00-CSLIBp | C | Wet | 18 | 1.01581694 | 1.040875 | 0.238353 | 14.1541832 | 0.79745486 | 0.98318337 | 0.81109474 | 0.27908587 | 1 |

|                         |   |     |    |            |          |          |            |            |            |            |            |   |
|-------------------------|---|-----|----|------------|----------|----------|------------|------------|------------|------------|------------|---|
| 2021-11-22-11-42-CSLIBp | C | Dry | 11 | 1.00372772 | 0.028177 | 0.101019 | 6.65322899 | 0.68824276 | 0.96395863 | 0.71397542 | 0.09972299 | 0 |
| 2021-11-24-07-24-CSLIBp | C | Dry | 07 | 1.00851235 | 0.390848 | 0.143598 | 9.07082715 | 0.72022517 | 0.95944164 | 0.75067116 | 0.11166898 | 2 |
| 2020-12-20-15-06-CSLIBp | C | Dry | 15 | 1.02209415 | 0.62727  | 0.154856 | 10.1940951 | 0.62089913 | 0.95358842 | 0.65111857 | 0.10749108 | 3 |
| 2020-12-20-17-42-CSLIBp | C | Dry | 17 | 1.00826401 | 0.631923 | 0.166126 | 11.70158   | 0.73846846 | 0.97807586 | 0.75502166 | 0.3353151  | 1 |
| 2020-12-22-12-48-CSLIBp | C | Dry | 12 | 1.01556539 | 0.382024 | 0.134622 | 10.8935121 | 0.66920801 | 0.96518649 | 0.69334581 | 0.17065398 | 3 |
| 2020-12-23-11-12-CSLIBp | C | Dry | 11 | 1.04202466 | 1.049801 | 0.264014 | 20.7084231 | 0.73552477 | 0.96315757 | 0.76365985 | 0.18178359 | 3 |
| 2020-12-27-09-18-CSLIBp | C | Dry | 09 | 1.01098391 | 2.286727 | 0.905343 | 7.22267807 | 0.88398163 | 0.98697383 | 0.8956485  | 0.91224733 | 3 |
| 2021-02-01-12-12-CSLIBp | C | Dry | 12 | 1.00669123 | 0.222296 | 0.111502 | 7.2473251  | 0.68930016 | 0.96331601 | 0.71554937 | 0.11605232 | 4 |
| 2021-02-03-08-18-CSLIBp | C | Dry | 08 | 1.10334275 | 1.780429 | 0.455412 | 11.4103255 | 0.80275237 | 0.92769034 | 0.86532363 | 0.03467301 | 5 |
| 2021-02-06-14-00-CSLIBp | C | Dry | 14 | 0.99988159 | 0.435748 | 0.134938 | 11.9848711 | 0.71868971 | 0.96171013 | 0.74730388 | 0.08323425 | 3 |
| 2021-02-06-15-54-CSLIBp | C | Dry | 15 | 1.00429389 | 0.462452 | 0.140255 | 13.7796769 | 0.68658418 | 0.96080082 | 0.71459575 | 0.12085612 | 2 |
| 2021-02-07-12-00-CSLIBp | C | Dry | 12 | 1.02310404 | 0.546693 | 0.144641 | 11.1434449 | 0.62222592 | 0.92547749 | 0.67232961 | 0.02739596 | 6 |
| 2021-02-10-17-06-CSLIBp | C | Dry | 17 | 1.02429099 | 0.801806 | 0.197798 | 11.0548131 | 0.7890998  | 0.97769665 | 0.80710085 | 0.19476813 | 2 |
| 2021-02-12-14-00-CSLIBp | C | Dry | 14 | 1.00364794 | 0.881229 | 0.194546 | 9.89383396 | 0.80541001 | 0.98087661 | 0.82111246 | 0.05041617 | 2 |
| 2021-02-13-07-06-CSLIBp | C | Dry | 07 | 1.00431091 | 0.862934 | 0.202123 | 14.8741934 | 0.83604776 | 0.96818756 | 0.86351838 | 0.10758621 | 3 |
| 2021-02-13-14-36-CSLIBp | C | Dry | 14 | 1.00402948 | 0.617876 | 0.154365 | 10.8391239 | 0.7438339  | 0.97901331 | 0.75977915 | 0.22606421 | 3 |
| 2021-02-21-06-30-CSLIBp | C | Dry | 06 | 0.99686576 | 1.808582 | 0.471854 | 9.33604203 | 0.88114794 | 0.96706542 | 0.9111565  | 0.05231867 | 5 |
| 2021-02-22-05-06-CSLIBp | C | Dry | 05 | 1.01131484 | 1.248934 | 0.280263 | 6.47152519 | 0.81198179 | 0.96515728 | 0.84129479 | 0.15410226 | 3 |
| 2021-02-23-05-42-CSLIBp | C | Dry | 05 | 0.99662072 | 1.798072 | 0.466859 | 12.3747264 | 0.86026194 | 0.97359018 | 0.88359759 | 0.29307967 | 6 |
| 2021-02-23-13-42-CSLIBp | C | Dry | 13 | 1.00345561 | 0.664694 | 0.175324 | 14.4476173 | 0.69081579 | 0.96051826 | 0.71921151 | 0.14302021 | 4 |
| 2021-03-02-09-48-CSLIBp | C | Dry | 09 | 1.01001431 | 0.692322 | 0.165611 | 14.2258732 | 0.75227406 | 0.96903405 | 0.77631333 | 0.19120095 | 3 |
| 2021-03-03-06-42-CSLIBp | C | Dry | 06 | 0.99815098 | 1.842928 | 0.5052   | 11.9047162 | 0.76094351 | 0.97346396 | 0.78168638 | 0.38820452 | 5 |
| 2021-03-03-13-36-CSLIBp | C | Dry | 13 | 1.02441713 | 1.542496 | 0.356861 | 6.29831791 | 0.73810444 | 0.93429492 | 0.79001226 | 0.07191439 | 3 |
| 2021-03-03-17-30-CSLIBp | C | Dry | 17 | 1.01312887 | 1.614618 | 0.383367 | 12.8957097 | 0.67455624 | 0.93075093 | 0.7247441  | 0.05707491 | 1 |
| 2021-03-14-14-06-CSLIBp | C | Dry | 14 | 1.00169939 | 0.322465 | 0.123165 | 13.4696037 | 0.70320414 | 0.95994945 | 0.73254288 | 0.08523187 | 3 |
| 2021-03-20-06-54-CSLIBp | C | Dry | 06 | 0.99841387 | 0.954218 | 0.227104 | 11.2934644 | 0.82069502 | 0.97611521 | 0.8407768  | 0.11586207 | 6 |
| 2021-03-22-11-00-CSLIBp | C | Dry | 11 | 1.0051296  | 1.041564 | 0.227294 | 11.5380287 | 0.71668106 | 0.93371031 | 0.76756254 | 0.03976219 | 3 |
| 2021-03-22-15-36-CSLIBp | C | Dry | 15 | 1.01025446 | 0.494021 | 0.137264 | 9.61716541 | 0.66432252 | 0.94201358 | 0.70521543 | 0.05850178 | 3 |

|                         |   |     |    |            |          |          |            |            |            |            |            |   |
|-------------------------|---|-----|----|------------|----------|----------|------------|------------|------------|------------|------------|---|
| 2021-03-24-05-00-CSLIBp | C | Dry | 05 | 1.02115128 | 1.592342 | 0.376277 | 14.1522384 | 0.81342514 | 0.93855234 | 0.86668064 | 0.04513674 | 5 |
| 2021-03-25-07-30-CSLIBp | C | Dry | 07 | 1.00379236 | 0.72817  | 0.185134 | 13.5846907 | 0.793443   | 0.96588287 | 0.82146917 | 0.0662069  | 5 |
| 2021-03-28-18-12-CSLIBp | C | Dry | 18 | 1.01347443 | 1.613998 | 0.385278 | 16.0580323 | 0.67042985 | 0.9136448  | 0.73379704 | 0.00442331 | 0 |
| 2021-03-30-16-18-CSLIBp | C | Dry | 16 | 1.01385446 | 0.572328 | 0.157937 | 12.9791592 | 0.71385952 | 0.96477138 | 0.7399261  | 0.11862069 | 2 |
| 2021-03-31-05-00-CSLIBp | C | Dry | 05 | 1.00904991 | 1.241238 | 0.274709 | 10.7448121 | 0.66340407 | 0.9235666  | 0.71830669 | 0.01598098 | 4 |
| 2021-04-01-16-54-CSLIBp | C | Dry | 16 | 1.02717876 | 1.62147  | 0.462668 | 12.9464725 | 0.77931664 | 0.97729417 | 0.79742279 | 0.38953627 | 0 |
| 2021-04-04-09-12-CSLIBp | C | Dry | 09 | 0.99569562 | 0.804621 | 0.175932 | 11.2636867 | 0.81539045 | 0.98122172 | 0.83099511 | 0.0616409  | 4 |
| 2021-04-04-15-00-CSLIBp | C | Dry | 15 | 1.01723111 | 1.321905 | 0.291297 | 11.2879801 | 0.73959144 | 0.92646285 | 0.79829584 | 0.00722949 | 5 |
| 2021-04-06-09-24-CSLIBp | C | Dry | 09 | 0.99774833 | 1.247641 | 0.325533 | 10.2439234 | 0.84741053 | 0.9619755  | 0.88090656 | 0.03167658 | 3 |
| 2021-04-06-16-18-CSLIBp | C | Dry | 16 | 1.02250312 | 0.926168 | 0.209557 | 12.1894653 | 0.7006928  | 0.94814738 | 0.73901253 | 0.07277051 | 1 |
| 2021-04-08-05-24-CSLIBp | C | Dry | 05 | 0.99916398 | 0.55075  | 0.145883 | 13.8328055 | 0.76866913 | 0.97033429 | 0.79216939 | 0.0803805  | 4 |
| 2021-04-11-10-06-CSLIBp | C | Dry | 10 | 1.0009465  | 1.530868 | 0.357021 | 14.1085135 | 0.80094326 | 0.94078026 | 0.85136061 | 0.01065398 | 6 |
| 2021-04-13-08-00-CSLIBp | C | Dry | 08 | 0.98192155 | 1.779629 | 0.464481 | 10.3392295 | 0.84928424 | 0.97908454 | 0.86742688 | 0.40085612 | 3 |
| 2021-04-13-14-18-CSLIBp | C | Dry | 14 | 0.99902284 | 0.703347 | 0.165441 | 15.7717724 | 0.73102003 | 0.96627441 | 0.75653461 | 0.12366231 | 4 |
| 2021-04-14-11-18-CSLIBp | C | Dry | 11 | 0.99495751 | 2.036574 | 0.59721  | 13.6124279 | 0.86306037 | 0.96779492 | 0.89178022 | 0.12470868 | 2 |
| 2021-04-19-13-12-CSLIBp | C | Dry | 13 | 1.00853888 | 1.751315 | 0.455607 | 6.34744518 | 0.86695011 | 0.98158042 | 0.88321863 | 0.08347206 | 2 |
| 2021-04-20-06-30-CSLIBp | C | Dry | 06 | 0.9972725  | 1.898682 | 0.516052 | 14.7755242 | 0.82526124 | 0.96962667 | 0.85111235 | 0.29593341 | 2 |
| 2021-04-21-14-36-CSLIBp | C | Dry | 14 | 1.00253061 | 1.577024 | 0.388744 | 6.61324141 | 0.85394433 | 0.9844325  | 0.86744833 | 0.22259215 | 3 |
| 2021-04-22-07-42-CSLIBp | C | Dry | 07 | 0.99887039 | 1.779686 | 0.475464 | 8.03754228 | 0.88231064 | 0.95784675 | 0.92113967 | 0.02497027 | 5 |
| 2021-04-24-10-18-CSLIBp | C | Dry | 10 | 0.99921284 | 1.677788 | 0.470455 | 6.05794144 | 0.88335175 | 0.97159278 | 0.909179   | 0.05659929 | 6 |
| 2021-04-24-16-12-CSLIBp | C | Dry | 16 | 1.06286607 | 1.700465 | 0.419437 | 13.7385557 | 0.83345916 | 0.95829959 | 0.86972714 | 0.05935791 | 1 |
| 2021-04-25-13-36-CSLIBp | C | Dry | 13 | 0.98629107 | 1.300901 | 0.286574 | 8.81701883 | 0.7861479  | 0.92630787 | 0.84868965 | 0.00799049 | 4 |
| 2021-04-26-06-30-CSLIBp | C | Dry | 06 | 0.97271193 | 1.678234 | 0.436325 | 9.30526316 | 0.81743878 | 0.98304512 | 0.83153739 | 0.7850654  | 2 |
| 2021-04-26-10-48-CSLIBp | C | Dry | 10 | 1.00673087 | 0.58704  | 0.157964 | 13.0740783 | 0.80861351 | 0.98231571 | 0.8231707  | 0.12451843 | 4 |
| 2021-05-01-16-06-CSLIBp | C | Wet | 16 | 0.99142719 | 1.695691 | 0.451316 | 12.9420272 | 0.8566998  | 0.97941668 | 0.87470412 | 0.19976219 | 2 |
| 2021-05-02-11-12-CSLIBp | C | Wet | 11 | 0.95881012 | 1.926205 | 0.539847 | 11.8703873 | 0.86849716 | 0.9698402  | 0.89550543 | 0.16480381 | 3 |
| 2021-05-09-10-24-CSLIBp | C | Wet | 10 | 0.983756   | 1.775979 | 0.500971 | 20.7324806 | 0.79308112 | 0.98005253 | 0.80922307 | 0.63315101 | 1 |
| 2021-05-11-09-30-CSLIBp | C | Wet | 09 | 0.99940411 | 1.899183 | 0.537531 | 17.1132189 | 0.84762007 | 0.98078115 | 0.86422956 | 0.62425684 | 3 |

|                         |   |     |    |            |          |          |            |            |            |            |            |   |
|-------------------------|---|-----|----|------------|----------|----------|------------|------------|------------|------------|------------|---|
| 2021-05-11-10-42-CSLIBp | C | Wet | 10 | 0.97841157 | 2.025034 | 0.630509 | 14.5049513 | 0.81036907 | 0.98253316 | 0.82477529 | 0.77117717 | 4 |
| 2021-05-15-13-00-CSLIBp | C | Wet | 13 | 0.98374138 | 1.639656 | 0.427428 | 12.9730668 | 0.78655063 | 0.96823555 | 0.81235463 | 0.32551724 | 3 |
| 2021-05-19-15-48-CSLIBp | C | Wet | 15 | 0.98137646 | 1.527626 | 0.356274 | 9.57307826 | 0.77288067 | 0.96140763 | 0.80390528 | 0.17303211 | 2 |
| 2021-05-21-15-42-CSLIBp | C | Wet | 15 | 1.02282961 | 1.418294 | 0.32827  | 12.0055743 | 0.84775991 | 0.97707298 | 0.8676526  | 0.13969084 | 2 |
| 2021-05-22-09-12-CSLIBp | C | Wet | 09 | 0.99309071 | 2.015889 | 0.621626 | 19.5303432 | 0.80900514 | 0.97538477 | 0.82942154 | 0.54982164 | 3 |
| 2021-05-22-14-54-CSLIBp | C | Wet | 14 | 0.99569258 | 2.243244 | 0.844891 | 12.3727553 | 0.82565569 | 0.94990271 | 0.86920027 | 0.09036861 | 3 |
| 2021-05-23-05-06-CSLIBp | C | Wet | 05 | 0.99784937 | 2.094074 | 0.69225  | 18.9911196 | 0.80278346 | 0.98580862 | 0.81434006 | 0.93831153 | 3 |
| 2021-05-28-12-54-CSLIBp | C | Wet | 12 | 0.99377736 | 1.705028 | 0.462444 | 14.8795858 | 0.81805103 | 0.98241896 | 0.8326906  | 0.75338882 | 2 |
| 2021-05-29-17-00-CSLIBp | C | Wet | 17 | 0.98926448 | 1.340848 | 0.298841 | 12.7870243 | 0.76172563 | 0.98465881 | 0.77359347 | 0.69060642 | 1 |
| 2021-06-01-09-00-CSLIBp | C | Wet | 09 | 0.99074167 | 2.047151 | 0.655521 | 19.2020955 | 0.79935705 | 0.97787466 | 0.81744327 | 0.59714625 | 3 |
| 2021-06-05-05-42-CSLIBp | C | Wet | 05 | 0.99844072 | 1.926189 | 0.573546 | 13.9842223 | 0.8219833  | 0.98578521 | 0.83383611 | 0.8991201  | 5 |
| 2021-06-06-05-06-CSLIBp | C | Wet | 05 | 1.0138766  | 1.876136 | 0.561533 | 18.2010396 | 0.81873316 | 0.9855507  | 0.83073672 | 0.91819263 | 3 |
| 2021-06-06-05-48-CSLIBp | C | Wet | 05 | 1.02225902 | 1.99417  | 0.619942 | 12.2015494 | 0.81834606 | 0.98277381 | 0.83269015 | 0.800761   | 3 |
| 2021-06-06-12-00-CSLIBp | C | Wet | 12 | 0.9885277  | 1.853847 | 0.549995 | 17.920085  | 0.80707164 | 0.98436385 | 0.81989159 | 0.79148633 | 4 |
| 2021-06-08-18-12-CSLIBp | C | Wet | 18 | 1.01755254 | 1.123352 | 0.244654 | 11.6633656 | 0.74024545 | 0.97963626 | 0.75563296 | 0.57807372 | 0 |
| 2021-06-09-16-24-CSLIBp | C | Wet | 16 | 1.00566843 | 1.464349 | 0.335267 | 13.1718114 | 0.84934181 | 0.98094205 | 0.865843   | 0.53436385 | 1 |
| 2021-06-16-06-24-CSLIBp | C | Wet | 06 | 0.99340735 | 1.782286 | 0.493971 | 18.5693171 | 0.81522564 | 0.98448086 | 0.82807667 | 0.82868014 | 3 |
| 2021-06-18-08-30-CSLIBp | C | Wet | 08 | 0.95374192 | 2.298718 | 0.949975 | 4.16946612 | 0.86207839 | 0.98294854 | 0.87703309 | 0.83234245 | 2 |
| 2021-06-23-15-00-CSLIBp | C | Wet | 15 | 1.01277356 | 1.934047 | 0.547859 | 7.519977   | 0.88238289 | 0.96182844 | 0.91740153 | 0.04623068 | 3 |
| 2021-06-30-07-48-CSLIBp | C | Wet | 07 | 0.98440172 | 1.731553 | 0.434432 | 7.36393211 | 0.8177323  | 0.95481251 | 0.85643232 | 0.08684899 | 2 |
| 2021-07-01-08-48-CSLIBp | C | Wet | 08 | 0.98000455 | 1.682589 | 0.464963 | 10.5951478 | 0.82990717 | 0.96727598 | 0.85798386 | 0.18644471 | 3 |
| 2021-07-04-14-06-CSLIBp | C | Wet | 14 | 1.01651066 | 1.145245 | 0.274251 | 7.31336028 | 0.79813683 | 0.96644169 | 0.82585099 | 0.24984542 | 1 |
| 2021-07-06-07-42-CSLIBp | C | Wet | 07 | 0.97107316 | 2.090372 | 0.65532  | 9.76767887 | 0.82284161 | 0.97438562 | 0.84447224 | 0.45845422 | 3 |
| 2021-07-06-15-36-CSLIBp | C | Wet | 15 | 1.01249051 | 1.725114 | 0.43536  | 9.66651354 | 0.84301923 | 0.9749613  | 0.86466944 | 0.28366231 | 2 |
| 2021-07-07-10-00-CSLIBp | C | Wet | 10 | 0.99559346 | 1.568666 | 0.368168 | 8.38215785 | 0.8373476  | 0.97825853 | 0.85595738 | 0.33788347 | 4 |
| 2021-07-11-11-12-CSLIBp | C | Wet | 11 | 0.96526177 | 1.710376 | 0.454479 | 13.2699588 | 0.79788865 | 0.96374201 | 0.82790689 | 0.23595719 | 4 |
| 2021-07-12-08-54-CSLIBp | C | Wet | 08 | 1.0035885  | 0.90637  | 0.200634 | 9.63623078 | 0.7809747  | 0.98146818 | 0.79572085 | 0.29241379 | 2 |
| 2021-07-14-14-12-CSLIBp | C | Wet | 14 | 1.00199855 | 0.765401 | 0.183379 | 12.3340009 | 0.78169033 | 0.97569861 | 0.80115963 | 0.15134364 | 4 |

|                         |   |     |    |            |          |          |            |            |            |            |            |   |
|-------------------------|---|-----|----|------------|----------|----------|------------|------------|------------|------------|------------|---|
| 2021-07-15-05-12-CSLIBp | C | Wet | 05 | 0.97495786 | 2.037406 | 0.612243 | 11.3590132 | 0.8299538  | 0.97167079 | 0.85415123 | 0.37821641 | 5 |
| 2021-07-15-06-36-CSLIBp | C | Wet | 06 | 0.98939148 | 2.097655 | 0.688514 | 13.3087419 | 0.81922099 | 0.98290339 | 0.8334705  | 0.83747919 | 2 |
| 2021-07-15-12-48-CSLIBp | C | Wet | 12 | 0.97307706 | 1.933796 | 0.547874 | 11.6696791 | 0.83806299 | 0.97950318 | 0.85560007 | 0.52394768 | 2 |
| 2021-07-18-13-30-CSLIBp | C | Wet | 13 | 0.99903925 | 1.626986 | 0.403327 | 13.5752648 | 0.85337583 | 0.96020129 | 0.8887468  | 0.04851367 | 4 |
| 2021-07-19-08-00-CSLIBp | C | Wet | 08 | 1.0037775  | 1.80203  | 0.469718 | 8.57875169 | 0.83567512 | 0.98287993 | 0.85023114 | 0.2983591  | 5 |
| 2021-07-22-08-24-CSLIBp | C | Wet | 08 | 0.99916295 | 2.277833 | 0.884406 | 7.15684445 | 0.85181495 | 0.97812602 | 0.87086421 | 0.55124851 | 3 |
| 2021-07-22-10-12-CSLIBp | C | Wet | 10 | 1.01162782 | 1.383475 | 0.306958 | 9.54447661 | 0.85508195 | 0.97707282 | 0.87514659 | 0.19671819 | 4 |
| 2021-07-22-18-48-CSLIBp | C | Wet | 18 | 1.00279567 | 2.271777 | 0.877659 | 7.32784242 | 0.87863328 | 0.98834558 | 0.88899398 | 0.78216409 | 0 |
| 2021-07-25-07-00-CSLIBp | C | Wet | 07 | 0.99089131 | 2.292874 | 0.931323 | 6.40982885 | 0.88140954 | 0.98633438 | 0.89362143 | 0.77350773 | 1 |
| 2021-07-26-18-48-CSLIBp | C | Wet | 18 | 1.0089625  | 2.002558 | 0.601392 | 6.87131902 | 0.87368321 | 0.98314097 | 0.88866524 | 0.06644471 | 0 |
| 2021-07-27-18-00-CSLIBp | C | Wet | 18 | 1.00875232 | 0.432502 | 0.141196 | 5.20931665 | 0.78534068 | 0.94747029 | 0.82888158 | 0.00242568 | 0 |
| 2021-07-29-10-54-CSLIBp | C | Wet | 10 | 0.99722722 | 2.036351 | 0.639403 | 18.5756365 | 0.78698929 | 0.98844178 | 0.79619185 | 0.99310345 | 1 |
| 2021-07-29-12-00-CSLIBp | C | Wet | 12 | 1.0373924  | 1.204291 | 0.257202 | 12.7517194 | 0.80691009 | 0.97782282 | 0.82521094 | 0.27129608 | 1 |
| 2021-07-30-12-36-CSLIBp | C | Wet | 12 | 0.98823179 | 2.103636 | 0.684512 | 16.0489008 | 0.80234462 | 0.98798008 | 0.81210607 | 0.87800238 | 0 |
| 2021-08-03-15-24-CSLIBp | C | Wet | 15 | 1.0179814  | 2.199577 | 0.747101 | 6.97326159 | 0.86047593 | 0.97329769 | 0.88408298 | 0.32532699 | 0 |
| 2021-08-04-11-30-CSLIBp | C | Wet | 11 | 0.99735605 | 2.196159 | 0.747924 | 7.72553712 | 0.85898331 | 0.97041007 | 0.8851756  | 0.34216409 | 1 |
| 2021-08-05-09-42-CSLIBp | C | Wet | 09 | 0.99772711 | 1.794284 | 0.462208 | 6.12072554 | 0.85384408 | 0.97060993 | 0.87969848 | 0.28137931 | 4 |
| 2021-08-06-12-48-CSLIBp | C | Wet | 12 | 0.99943426 | 1.92206  | 0.53984  | 8.19581195 | 0.85405697 | 0.95466948 | 0.89461012 | 0.08889417 | 1 |
| 2021-08-16-08-54-CSLIBp | C | Wet | 08 | 1.00511058 | 0.248819 | 0.119687 | 6.89629823 | 0.77282585 | 0.9706931  | 0.7961588  | 0.00656362 | 3 |
| 2021-08-22-11-54-CSLIBp | C | Wet | 11 | 0.99158619 | 1.186831 | 0.251311 | 17.8111889 | 0.77713879 | 0.98792447 | 0.78663786 | 0.85170036 | 2 |
| 2021-08-26-17-00-CSLIBp | C | Wet | 17 | 1.00167397 | 1.355189 | 0.298287 | 11.5369823 | 0.81006198 | 0.98622912 | 0.821373   | 0.24941736 | 0 |
| 2021-08-27-10-00-CSLIBp | C | Wet | 10 | 1.00697825 | 1.814376 | 0.485706 | 7.71895841 | 0.86210129 | 0.97408376 | 0.88503815 | 0.24732461 | 3 |
| 2021-08-27-13-30-CSLIBp | C | Wet | 13 | 1.00308037 | 1.689754 | 0.422647 | 9.82241155 | 0.8129044  | 0.94487048 | 0.86033421 | 0.07001189 | 2 |
| 2021-08-30-11-42-CSLIBp | C | Wet | 11 | 1.01981177 | 1.2629   | 0.275435 | 9.624731   | 0.59691731 | 0.91805875 | 0.65019512 | 0.01170036 | 1 |
| 2021-09-03-17-48-CSLIBp | C | Wet | 17 | 1.00309972 | 1.784923 | 0.458424 | 9.24006942 | 0.83585006 | 0.95575498 | 0.87454428 | 0.11871582 | 0 |
| 2021-04-22-09-00-CSLIBp | C | Dry | 09 | 0.97508435 | 1.918303 | 0.55405  | 16.9203789 | 0.82299305 | 0.96936613 | 0.84900125 | 0.34027778 | 5 |
| 2021-09-05-09-00-CSLIBp | C | Wet | 09 | 1.00411282 | 0.491348 | 0.158632 | 6.21579319 | 0.77936917 | 0.96310478 | 0.80922573 | 0.00180737 | 2 |
| 2021-09-06-12-54-CSLIBp | C | Wet | 12 | 1.01259193 | 0.806791 | 0.220696 | 9.45693539 | 0.72441598 | 0.96997476 | 0.74684003 | 0.24351962 | 3 |

|                         |   |     |    |            |          |          |            |            |            |            |            |   |
|-------------------------|---|-----|----|------------|----------|----------|------------|------------|------------|------------|------------|---|
| 2021-09-07-06-18-CSLIBp | C | Wet | 06 | 0.99580094 | 2.053775 | 0.658172 | 7.76253127 | 0.84791147 | 0.9852818  | 0.86057762 | 0.78439952 | 0 |
| 2021-09-12-07-30-CSLIBp | C | Wet | 07 | 1.00563299 | 2.223903 | 0.794237 | 12.7179689 | 0.81407119 | 0.92174127 | 0.88318839 | 0.0134126  | 3 |
| 2021-09-18-18-12-CSLIBp | C | Wet | 18 | 1.03880268 | 0.947484 | 0.205691 | 12.0863117 | 0.76819048 | 0.96975889 | 0.79214585 | 0.17693222 | 0 |
| 2021-09-19-18-30-CSLIBp | C | Wet | 18 | 1.00594981 | 0.954239 | 0.204741 | 11.6844385 | 0.83498597 | 0.97949565 | 0.85246522 | 0.06725327 | 0 |
| 2021-09-20-18-12-CSLIBp | C | Wet | 18 | 0.99416454 | 1.003123 | 0.216766 | 11.0424468 | 0.71875128 | 0.95991756 | 0.74876356 | 0.11300832 | 0 |
| 2021-09-23-06-18-CSLIBp | C | Wet | 06 | 1.0052724  | 0.792284 | 0.206418 | 10.0786259 | 0.77658105 | 0.96422575 | 0.8053934  | 0.10787158 | 7 |
| 2021-09-23-17-06-CSLIBp | C | Wet | 17 | 1.02354166 | 0.968019 | 0.210656 | 8.82643126 | 0.73001308 | 0.96701468 | 0.75491417 | 0.14368609 | 1 |
| 2021-09-25-13-48-CSLIBp | C | Wet | 13 | 0.98881197 | 2.162835 | 0.757966 | 12.0059708 | 0.81191862 | 0.98881644 | 0.82110145 | 0.97241379 | 1 |
| 2021-09-25-15-00-CSLIBp | C | Wet | 15 | 1.00706884 | 1.30125  | 0.311335 | 16.7365679 | 0.76908136 | 0.9744669  | 0.78923292 | 0.3705113  | 0 |
| 2021-09-26-13-48-CSLIBp | C | Wet | 13 | 1.03332757 | 1.177299 | 0.26819  | 9.57885553 | 0.74618943 | 0.9723538  | 0.76740527 | 0.23286564 | 0 |
| 2021-10-01-06-54-CSLIBp | C | Wet | 06 | 1.00612996 | 1.349088 | 0.325789 | 13.3557465 | 0.83391634 | 0.98193247 | 0.84926038 | 0.23010702 | 3 |
| 2021-10-08-16-00-CSLIBp | C | Wet | 16 | 1.01466471 | 0.9247   | 0.205745 | 10.7507298 | 0.77845037 | 0.97053917 | 0.80208032 | 0.13702735 | 1 |
| 2021-10-21-17-54-CSLIBp | C | Wet | 17 | 1.00989271 | 1.243945 | 0.267595 | 10.9528813 | 0.79838694 | 0.97938241 | 0.81519428 | 0.1412604  | 0 |
| 2021-11-29-13-54-CSLIBp | C | Dry | 13 | 1.00884518 | 0.019218 | 0.100607 | 6.42725198 | 0.69725067 | 0.96508491 | 0.72247599 | 0.08370987 | 1 |
| 2021-12-10-07-42-CSLIBp | C | Dry | 07 | 1.00881978 | 1.347152 | 0.335753 | 10.7293433 | 0.82551657 | 0.97320426 | 0.84824595 | 0.35548157 | 3 |
| 2021-12-31-16-00-CSLIBp | C | Dry | 16 | 1.03211253 | 0.51916  | 0.149007 | 10.191926  | 0.66213269 | 0.96573916 | 0.6856227  | 0.24813318 | 0 |
| 2022-01-05-09-00-CSLIBp | C | Dry | 09 | 1.02034454 | 0.632043 | 0.155692 | 7.24220624 | 0.63833366 | 0.96605858 | 0.66076082 | 0.26568371 | 1 |
| 2022-01-06-07-48-CSLIBp | C | Dry | 07 | 1.01336653 | 0.494244 | 0.150996 | 13.5751881 | 0.75104277 | 0.96701805 | 0.77665848 | 0.11300832 | 3 |
| 2022-01-13-17-18-CSLIBp | C | Dry | 17 | 1.00770974 | 1.793708 | 0.468384 | 16.8126913 | 0.8552377  | 0.9854445  | 0.86786999 | 0.1465874  | 0 |
| 2022-01-14-16-00-CSLIBp | C | Dry | 16 | 1.00879407 | 1.226207 | 0.26375  | 12.7404881 | 0.7588098  | 0.97490964 | 0.77833859 | 0.24870392 | 0 |
| 2022-01-15-11-24-CSLIBp | C | Dry | 11 | 1.0129746  | 0.366496 | 0.126756 | 8.49118643 | 0.73646759 | 0.96009494 | 0.76707788 | 0.07724138 | 1 |
| 2022-01-17-18-12-CSLIBp | C | Dry | 18 | 1.00995606 | 1.277503 | 0.292422 | 13.8393781 | 0.79251046 | 0.96652791 | 0.81995611 | 0.07667063 | 0 |
| 2022-01-18-11-54-CSLIBp | C | Dry | 11 | 1.01450064 | 0.776892 | 0.177636 | 10.1078011 | 0.76226192 | 0.97380129 | 0.78276947 | 0.24799049 | 1 |
| 2022-01-21-08-42-CSLIBp | C | Dry | 08 | 1.01706037 | 0.422717 | 0.136168 | 18.095932  | 0.66457232 | 0.96079066 | 0.69169315 | 0.15067777 | 2 |
| 2022-01-24-07-30-CSLIBp | C | Dry | 07 | 1.01110488 | 0.320939 | 0.11888  | 6.48655477 | 0.68903759 | 0.95517453 | 0.72137349 | 0.03828775 | 3 |
| 2022-01-25-08-36-CSLIBp | C | Dry | 08 | 1.01070554 | 1.116124 | 0.246085 | 10.057205  | 0.78720236 | 0.98385872 | 0.80011728 | 0.35919144 | 4 |
| 2022-01-25-14-00-CSLIBp | C | Dry | 14 | 1.0087176  | 1.506622 | 0.355207 | 14.6982112 | 0.8280533  | 0.97328549 | 0.85078151 | 0.11414982 | 0 |
| 2022-01-28-16-00-CSLIBp | C | Dry | 16 | 1.02673492 | 0.655035 | 0.154503 | 11.9359429 | 0.63687134 | 0.92413546 | 0.68915367 | 0.01640904 | 0 |

|                         |   |     |    |            |          |          |            |            |            |            |            |   |
|-------------------------|---|-----|----|------------|----------|----------|------------|------------|------------|------------|------------|---|
| 2022-01-29-10-48-CSLIBp | C | Dry | 10 | 1.00456228 | 0.663684 | 0.155311 | 14.8885229 | 0.83009397 | 0.98139036 | 0.84583466 | 0.13674197 | 0 |
| 2022-01-30-17-54-CSLIBp | C | Dry | 17 | 1.02444194 | 0.851502 | 0.187363 | 15.2807508 | 0.81811305 | 0.97290386 | 0.84089815 | 0.04513674 | 0 |
| 2022-01-31-18-00-CSLIBp | C | Dry | 18 | 1.02611808 | 1.935663 | 0.577499 | 14.0067244 | 0.87748561 | 0.9812316  | 0.89426962 | 0.03447087 | 0 |

---

The filename of each *.wav* file based on the YYYY-MM-DD-HH-mm timestamp (WAV), Normalized Acoustic Complexity index (nACI), Acoustic Diversity index (ADI), Inverse Acoustic Evenness index (1-AEI), Bioacoustic index (BI), Acoustic Entropy index (H), Temporal Entropy Index (Ht), Spectral Entropy Index (Hf), Acoustic Richness Index (AR), and Number of species heard (SH).
